# Supplementary material for: Facile synthesis of 4-acetoxyindoles via PhI(OAc)2-mediated dearomatization of 2-alkynylanilines
Source: Royal Society of Chemistry journal article supplement (doi:10.1039/d1qo00358e), 2021-01-01

## Supporting Information

### Facile Synthesis of 4-Acetoxyindoles via $\text{PhI}(\text{OAc})_2$ - Mediated Dearomatization of 2-Alkynylanilines

Yue Wang,<sup>a</sup> Qiuqin He,<sup>\*a</sup> and Renhua Fan<sup>\*a</sup>

*<sup>a</sup>Department of Chemistry, Fudan University, 220 Handan Road,  
Shanghai, 200433, China.*

*\*E-mail: rhfan@fudan.edu.cn*

#### Context

|                                                                     |     |
|---------------------------------------------------------------------|-----|
| General Information.....                                            | S1  |
| Experimental procedures and characterization data.....              | S1  |
| Copies of $^1\text{H}$ and $^{13}\text{C}$ spectra of products..... | S14 |

## General Information

All reactions were performed in round bottom flask or Schlenk tubes. Flash column chromatography was performed using silica gel (60-Å pore size, 32–63 μm, standard grade). Analytical thin-layer chromatography was performed using glass plates pre-coated with 0.25 mm 230–400 mesh silica gel impregnated with a fluorescent indicator (254 nm). Thin layer chromatography plates were visualized by exposure to ultraviolet light. Organic solutions were concentrated on rotary evaporators at ~20 Torr (house vacuum) at 35–40 °C. Commercial reagents and solvents were used as received. Nuclear magnetic resonance (NMR) spectra are recorded in parts per million from internal tetramethylsilane on the δ scale.

## Experimental procedures and characterization data

### Example for the synthesis of **2c**

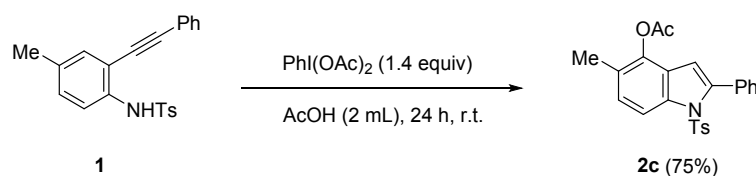

In a dry round bottom flask, a solution of 4-methyl-*N*-(4-methyl-2-(phenylethynyl)phenyl)benzenesulfonamide **1** (36 mg, 0.1 mmol, 1 equiv) in  $\text{AcOH}$  (2 mL) was mixed with  $\text{PhI}(\text{OAc})_2$  (45 mg, 0.14 mmol, 1.4 equiv). After stirring at room temperature for 24 h, the reaction mixture was quenched with saturated  $\text{NaHCO}_3$ , and extracted by ethyl acetate (5 mL  $\times$  3). The organic layers were combined, dried over  $\text{Na}_2\text{SO}_4$ , filtered and concentrated in vacuo. The residue was purified by flash column chromatography on silica gel (eluent: petroleum ether/ethyl acetate = 5/1) to furnish the desired compound **2c** (75%).

In a large-scale experiment, **1** (3.6 g, 10 mmol, 1 equiv) and  $\text{PhI}(\text{OAc})_2$  (4.5 g, 14 mmol, 1.4 equiv) were placed in a round bottom flask (250 mL),  $\text{AcOH}$  (60 mL) was added, and the reaction was stopped after stirring at room temperature for 24 hours. The desired compound **2c** was obtained with a yield of 65% after separation and purification.

### Example for the synthesis of **16**

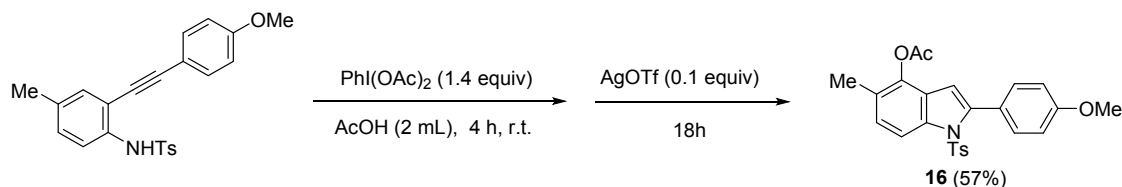

In a dry round bottom flask, a solution of *N*-(2-((4-methoxyphenyl)ethynyl)-4-methylphenyl)-4-methylbenzenesulfonamide (36 mg, 0.1 mmol, 1 equiv) in acetic acid  $\text{AcOH}$  (1 mL) was mixed with  $\text{PhI}(\text{OAc})_2$  (45 mg, 0.14 mmol, 1.4 equiv). The resulting mixture was stirred at room temperature for 4 h, then the catalyst  $\text{AgOTf}$  (3 mg, 0.01 mmol, 0.1 equiv) was added into the mixture. After stirring at room temperature for 18 h, the reaction mixture was quenched with saturated  $\text{NaHCO}_3$ , and extracted by ethyl acetate (5 mL  $\times$  3). The organic layers were combined, dried over  $\text{Na}_2\text{SO}_4$ ,

filtered and concentrated in vacuo. The residue was purified by flash column chromatography on silica gel (eluent: petroleum ether/ethyl acetate = 5/1) to furnish the desired compound **16** (57%).

### Example for the synthesis of **28**

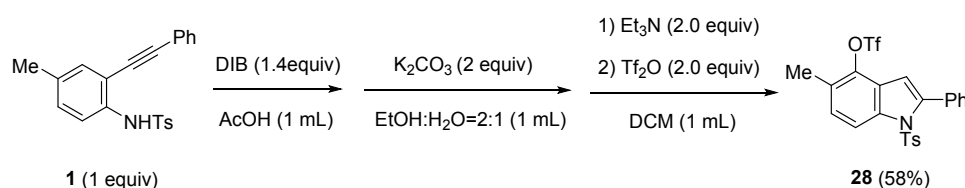

In a dry round bottom flask, a solution of 4-methyl-2-(phenylethynyl)phenyl)benzenesulfonamide **1** (36 mg, 0.1 mmol, 1 equiv) in AcOH (1.0 mL) was mixed with  $\text{PhI}(\text{OAc})_2$  (45 mg, 0.14 mmol, 1.4 equiv). AcOH was removed under reduced pressure and the residue was dissolved in a mixed solvent ( $\text{EtOH}/\text{H}_2\text{O} = 2/1$ , 1 mL). To this solution was added  $\text{K}_2\text{CO}_3$  (28 mg, 0.2 mmol, 2 equiv). The resulting mixture was heated at reflux for 6 h and then concentrated in vacuum. The residue was dissolved in DCM (1 mL) and cooled to 0 °C.  $\text{Et}_3\text{N}$  (20 mg, 0.2 mmol, 2 equiv) was added dropwise to this solution followed by  $\text{Tf}_2\text{O}$  (56 mg, 0.2 mmol, 2 equiv). After stirring at 0°C for 10 min, the reaction was allowed to warm to room temperature and stirred for 8 h, quenched with saturated aqueous  $\text{NaHCO}_3$  solution, and extracted by ethyl acetate (10 mL  $\times$  3). The combined organic layers were washed with brine, dried over  $\text{Na}_2\text{SO}_4$ , filtered and concentrated in vacuo. The residue was purified by flash column chromatography on silica gel (eluent: petroleum ether/ethyl acetate = 10/1) to furnish the desired compound **28** (58%).

### Example for the synthesis of **29**

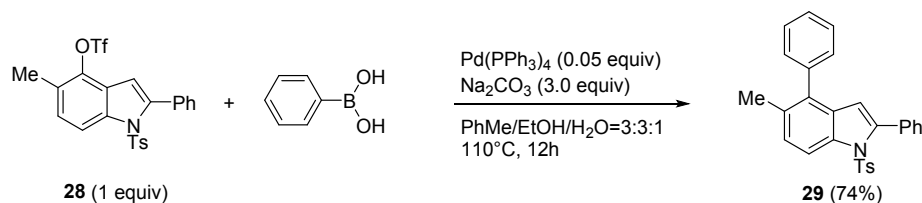

5-methyl-2-phenyl-1-tosyl-1H-indol-4-yl trifluoromethanesulfonate **28** (51 mg, 0.1 mmol, 1 equiv), phenylboronic acid (13 mg, 0.11 mmol, 1.1 equiv), tetrakis(triphenylphosphine)palladium (6 mg, 0.005 mmol, 0.05equiv), sodium carbonate (32 mg, 0.3 mmol, 3.0 equiv), toluene (0.3 mL), ethanol (0.3 mL) and water (0.1 mL) were mixed under nitrogen atmosphere. After stirring at 110 °C for 12 h the mixture was cooled down to the room temperature and treated with 2 M HCl (1 mL) and water (1 mL). The aqueous phase was extracted with ethyl acetate (10 mL  $\times$  3). The combined organic layers were washed with brine, dried over  $\text{Na}_2\text{SO}_4$  filtered and concentrated in vacuo. The residue was purified by flash column chromatography on silica gel (eluent: petroleum ether/ethyl acetate = 10/1) to furnish the desired compound **29** (74%).

### Example for the synthesis of **30**

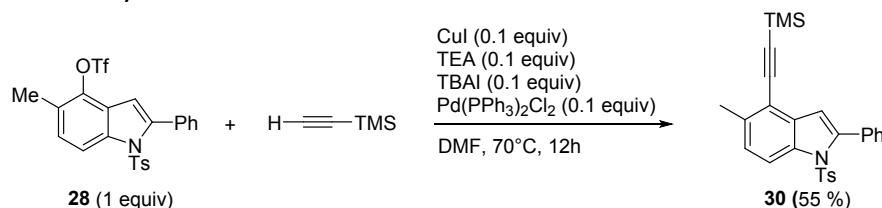

To a stirred solution of 5-methyl-2-phenyl-1-tosyl-1*H*-indol-4-yl trifluoromethanesulfonate **28** (51 mg, 0.1 mmol, 1 equiv), CuI (2 mg, 0.01 mmol, 0.1 equiv), TBAI (4 g, 0.01 mmol, 0.1 equiv) and Pd(PPh<sub>3</sub>)Cl<sub>2</sub> (7 mg, 0.01 mmol, 0.1 equiv) in dry DMF (1 mL) were added trimethylsilylacetylene (20 mg, 0.2 mmol, 2 equiv) and TEA (1 mg, 0.01 mmol, 0.1 equiv) under nitrogen atmosphere. After stirring for 12 h at 70 °C, the reaction mixture was poured into saturated aqueous NH<sub>4</sub>Cl solution and extracted with ethyl acetate (10 mL × 3). The combined organic layers were washed with water, brine, dried over Na<sub>2</sub>SO<sub>4</sub>, filtered and concentrated in vacuo to give a residue, which was purified by flash column chromatography on silica gel (eluent: petroleum ether/ethyl acetate = 10/1) to furnish the desired compound **30** (55%).

#### Example for the synthesis of **31**

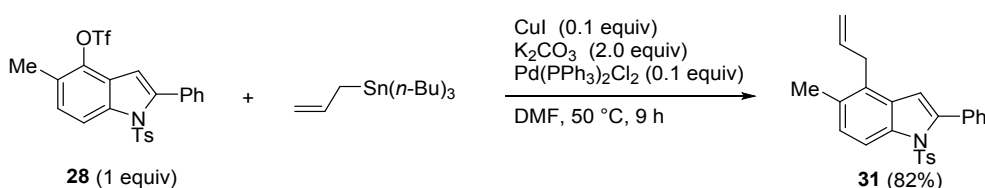

To a suspension of 5-methyl-2-phenyl-1-tosyl-1*H*-indol-4-yl trifluoromethanesulfonate **28** (51 mg, 0.1 mmol, 1 equiv), Pd(PPh<sub>3</sub>)Cl<sub>2</sub> (7 mg, 0.01 mmol, 0.1 equiv), CuI (2 mg, 0.01 mmol, 0.1 equiv) and K<sub>2</sub>CO<sub>3</sub> (0.2 mmol) in dry DMF (1 mL) was added allyltributylstannane (33 mg, 0.1 mmol, 1equiv). The mixture was stirred at 50 °C under nitrogen atmosphere for 9 h. After cooling to room temperature, water was added and the aqueous phase was extracted with ethyl acetate (10 mL × 3). The combined organic layers were washed with brine, dried over Na<sub>2</sub>SO<sub>4</sub>, filtered and concentrated in vacuo. The residue was purified by flash column chromatography on silica gel (eluent: petroleum ether/ethyl acetate = 10/1) to furnish the desired compound **31** (82%).

#### Example for the synthesis of **32**

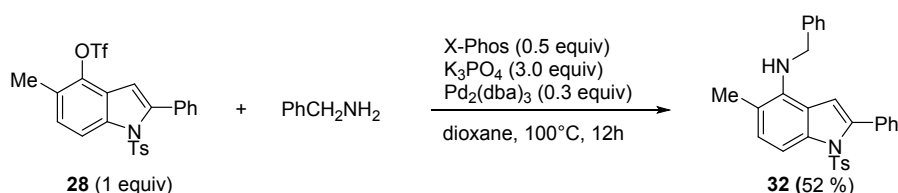

In a dry Schlenk tube, to a solution of 5-methyl-2-phenyl-1-tosyl-1*H*-indol-4-yl trifluoromethanesulfonate **28** (51 mg, 0.1 mmol, 1 equiv), Pd<sub>2</sub>(dba)<sub>3</sub> (14 mg, 0.03 mmol, 0.3 equiv), X-Phos (12 g, 0.05 mmol, 0.5 equiv) and K<sub>3</sub>PO<sub>4</sub> (32 mg, 0.3 mmol, 3 equiv) in dry 1,4-dioxane (1 mL) was added benzylamine (22 mg, 0.2 mmol, 2 equiv). The reaction mixture was stirred at 100 °C under nitrogen atmosphere for 12 h. After cooling to room temperature, water was added and the aqueous phase was extracted with ethyl acetate (10 mL × 3), dried over Na<sub>2</sub>SO<sub>4</sub>, filtered and concentrated in vacuo. The residue was purified by flash column chromatography on silica gel (eluent: petroleum ether/ethyl acetate = 10/1) to furnish the desired compound **32** (52%).

#### Example for the synthesis of **33**

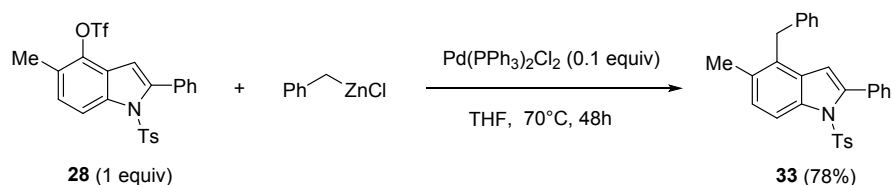

In a dry Schlenk tube, a solution of benzyl chloride (in THF, 19 mg, 0.15 mmol, 1.5 equiv) and ZnCl<sub>2</sub> (1M in THF, 22 mg, 0.16 mmol, 1.6 equiv) were stirred at room temperature for 20 minutes under nitrogen atmosphere. A solution of 5-methyl-2-phenyl-1-tosyl-1H-indol-4-yl trifluoromethanesulfonate **28** (51 mg, 0.1 mmol, 1 equiv) and Pd(PPh<sub>3</sub>)Cl<sub>2</sub> (7 mg, 0.01 mmol, 0.1 equiv) in THF (1 mL) were added. The resulting mixture was stirred at 70°C for 48 h. The solvent was removed under reduced pressure and the residue was purified by flash column chromatography on silica gel (eluent: petroleum ether/ethyl acetate = 5/1) to furnish the desired compound **33** (58%).

#### Example for the synthesis of **34**

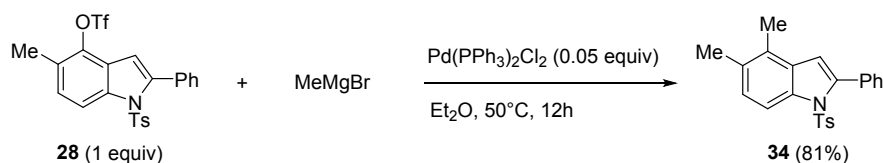

A dry Schlenk tube containing 5-methyl-2-phenyl-1-tosyl-1H-indol-4-yl trifluoromethanesulfonate **28** (51 mg, 0.1 mmol, 1 equiv) and Pd(PPh<sub>3</sub>)Cl<sub>2</sub> (4 mg, 0.005 mmol, 0.05 equiv) was evacuated and refilled three times with N<sub>2</sub>. After addition of Et<sub>2</sub>O (0.5 mL), the solution was stirred with N<sub>2</sub> at 0 °C for 10 minutes, and then treated with MeMgBr (in Et<sub>2</sub>O, 35 mg, 0.3 mmol, 3 equiv) dropwise. The mixture was warmed to 50 °C and stirred for 12 h. The mixture was cooled to 0 °C and treated dropwise with H<sub>2</sub>O (1 mL). After the addition of 1 M HCl (2 mL), the aqueous phase was extracted with ethyl acetate (10 mL × 3). The combined organic layers were washed with saturated aqueous NaHCO<sub>3</sub> solution, dried over Na<sub>2</sub>SO<sub>4</sub>, filtered and concentrated in vacuo. The residue was purified by flash column chromatography on silica gel (eluent: petroleum ether/ethyl acetate = 10/1) to furnish the desired compound **34** (81%).

#### Example for the synthesis of **35**

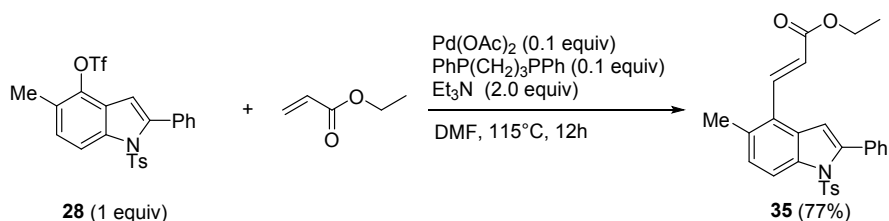

A mixture of 5-methyl-2-phenyl-1-tosyl-1H-indol-4-yl trifluoromethanesulfonate **28** (51 mg, 0.1 mmol, 1 equiv), ethyl acrylate (20 mg, 0.2 mmol, 2 equiv), Et<sub>3</sub>N (20 mg, 0.2 mmol, 2 equiv), 1,3-(diphenylphosphino)propane (2 mg, 0.01 mmol), and palladium(II) acetate (2 mg, 0.01 mmol, 0.1 equiv) in dry DMF (1 mL) was stirred at 115 °C under nitrogen atmosphere for 12 h. The solution was concentrated in vacuo and the residue was dissolved in CH<sub>2</sub>Cl<sub>2</sub>. The dichloromethane solution was washed with water, dried over Na<sub>2</sub>SO<sub>4</sub>, filtered, and then concentrated in vacuo. The residue

was purified by flash column chromatography on silica gel (eluent: petroleum ether/ethyl acetate = 10/1) to furnish the desired compound **35** (77%).

#### Characterization data of products **2-35**

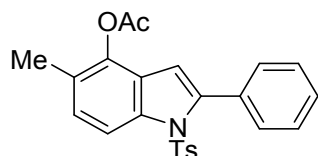

#### **5-methyl-2-phenyl-1-tosyl-1H-indol-4-yl acetate (2c)**

Amorphous yellow solid, yield 75% (31 mg). Mp.55.5 - 56.4 °C. <sup>1</sup>H NMR (400 MHz, Chloroform-*d*) δ 8.08 (d, *J* = 8.5 Hz, 1H), 7.48 - 7.39 (m, 5H), 7.27 (d, *J* = 7.8 Hz, 2H), 7.20 (d, *J* = 8.5 Hz, 1H), 7.05 (d, *J* = 8.1 Hz, 2H), 6.36 (s, 1H), 2.32 (s, 3H), 2.30 (s, 3H), 2.24 (s, 3H); <sup>13</sup>C NMR (101 MHz, Chloroform-*d*) δ 168.6, 144.7, 142.2, 141.1, 137.7, 134.7, 132.0, 130.4, 129.3, 128.8, 127.4, 127.4, 126.8, 125.2, 124.1, 114.2, 109.4, 21.5, 20.5, 15.7. HRMS (ESI) *m/z*: [M + Na]<sup>+</sup> calculated for C<sub>24</sub>H<sub>21</sub>NNaO<sub>4</sub>S 442.1089; Found 442.1084.

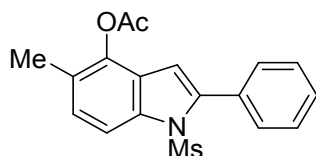

#### **5-methyl-1-(methylsulfonyl)-2-phenyl-1H-indol-4-yl acetate (3)**

Amorphous cyan solid, yield 68% (23 mg). Mp.150.3 - 151.1 °C. <sup>1</sup>H NMR (400 MHz, Chloroform-*d*) δ 7.90 (d, *J* = 8.5 Hz, 1H), 7.57 - 7.51 (m, 2H), 7.45 - 7.38 (m, 3H), 7.23 (d, *J* = 8.6 Hz, 1H), 6.53 (s, 1H), 2.76 (s, 3H), 2.40 (s, 3H), 2.28 (s, 3H); <sup>13</sup>C NMR (101 MHz, Chloroform-*d*) δ 168.7, 142.2, 141.3, 137.5, 131.6, 130.2, 129.0, 127.7, 127.7, 125.6, 124.0, 113.5, 109.0, 39.8, 20.6, 15.6. HRMS (ESI) *m/z*: [M + Na]<sup>+</sup> calculated for C<sub>18</sub>H<sub>17</sub>NNaO<sub>4</sub>S 366.0776; Found 366.0771.

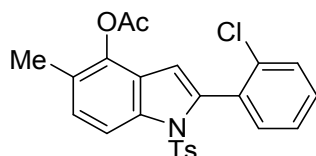

#### **2-(2-chlorophenyl)-5-methyl-1-tosyl-1H-indol-4-yl acetate (6)**

White liquid, yield 75% (34 mg). <sup>1</sup>H NMR (400 MHz, Chloroform-*d*) δ 8.04 (d, *J* = 8.5 Hz, 1H), 7.46 - 7.30 (m, 6H), 7.21 (d, *J* = 8.5 Hz, 1H), 7.11 (d, *J* = 8.1 Hz, 2H), 6.46 (s, 1H), 2.32 (s, 3H), 2.30 (s, 3H), 2.24 (s, 3H); <sup>13</sup>C NMR (101 MHz, Chloroform-*d*) δ 168.6, 144.8, 141.2, 137.4, 136.7, 135.1, 135.1, 132.9, 131.2, 130.2, 129.5, 129.2, 127.6, 126.9, 125.7, 124.8, 123.5, 113.2, 109.5, 21.5, 20.5, 15.6. HRMS (ESI) *m/z*: [M + Na]<sup>+</sup> calculated for C<sub>24</sub>H<sub>20</sub>ClNNaO<sub>4</sub>S 476.0699; Found 476.0694.

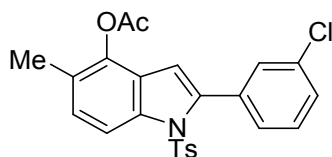

#### **2-(3-chlorophenyl)-5-methyl-1-tosyl-1H-indol-4-yl acetate (7)**

Yellow liquid, yield 73% (33 mg).  $^1\text{H}$  NMR (400 MHz, Chloroform-*d*)  $\delta$  8.07 (d,  $J$  = 8.6 Hz, 1H), 7.40 - 7.32 (m, 4H), 7.27 (d,  $J$  = 8.4 Hz, 2H), 7.22 (d,  $J$  = 8.6 Hz, 1H), 7.08 (d,  $J$  = 8.2 Hz, 2H), 6.39 (s, 1H), 2.33 (s, 3H), 2.31 (s, 3H), 2.24 (s, 3H);  $^{13}\text{C}$  NMR (101 MHz, Chloroform-*d*)  $\delta$  168.5, 144.9, 141.1, 140.4, 137.7, 134.5, 133.7, 133.3, 129.9, 129.4, 128.8, 128.7, 128.6, 127.8, 126.7, 125.4, 123.9, 114.1, 110.0, 21.5, 20.5, 15.6. HRMS (ESI)  $m/z$ :  $[\text{M} + \text{Na}]^+$  calculated for  $\text{C}_{24}\text{H}_{20}\text{ClNNaO}_4\text{S}$  476.0699; Found 476.0694.

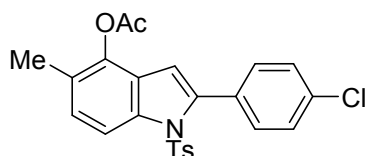

**2-(4-chlorophenyl)-5-methyl-1-tosyl-1H-indol-4-yl acetate (8)**

Amorphous white solid, yield 70% (32 mg). Mp.124.4 - 125.2 °C.  $^1\text{H}$  NMR (400 MHz, Chloroform-*d*)  $\delta$  8.08 (d,  $J$  = 8.5 Hz, 1H), 7.43 - 7.35 (m, 4H), 7.26 (d,  $J$  = 8.0 Hz, 2H), 7.21 (d,  $J$  = 8.6 Hz, 1H), 7.06 (d,  $J$  = 8.0 Hz, 2H), 6.36 (s, 1H), 2.33 (s, 3H), 2.30 (s, 3H), 2.24 (s, 3H);  $^{13}\text{C}$  NMR (101 MHz, Chloroform-*d*)  $\delta$  168.6, 144.9, 141.1, 140.9, 137.8, 134.9, 134.5, 131.6, 130.5, 129.4, 127.7, 127.7, 126.7, 125.4, 124.0, 114.2, 109.8, 21.5, 20.5, 15.7. HRMS (ESI)  $m/z$ :  $[\text{M} + \text{Na}]^+$  calculated for  $\text{C}_{24}\text{H}_{20}\text{ClNNaO}_4\text{S}$  476.0699; Found 476.0694.

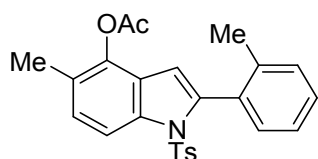

**5-methyl-2-(*o*-tolyl)-1-tosyl-1H-indol-4-yl acetate (9)**

Amorphous white solid, yield 78% (34 mg). Mp.115.7 - 116.5 °C.  $^1\text{H}$  NMR (400 MHz, Chloroform-*d*)  $\delta$  8.10 (d,  $J$  = 8.5 Hz, 1H), 7.38 - 7.33 (m, 3H), 7.25-7.15 (m, 3H), 7.11 (d,  $J$  = 8.0 Hz, 2H), 7.06 (d,  $J$  = 7.6 Hz, 1H), 6.30 (s, 1H), 2.33 (s, 6H), 2.26 (s, 3H), 2.19 (s, 3H);  $^{13}\text{C}$  NMR (101 MHz, Chloroform-*d*)  $\delta$  168.6, 144.8, 141.0, 140.5, 139.4, 136.8, 135.5, 131.7, 130.9, 129.5, 129.4, 129.2, 127.2, 123.0, 124.7, 124.6, 123.7, 113.3, 108.1, 21.5, 20.5, 20.4, 15.7. HRMS (ESI)  $m/z$ :  $[\text{M} + \text{Na}]^+$  calculated for  $\text{C}_{25}\text{H}_{23}\text{NNaO}_4\text{S}$  456.1245; Found 456.1240.

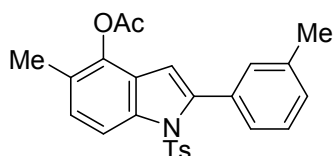

**5-methyl-2-(*m*-tolyl)-1-tosyl-1H-indol-4-yl acetate (10)**

Amorphous yellow solid, yield 66% (29 mg). Mp.55.7 - 56.3 °C.  $^1\text{H}$  NMR (400 MHz, Chloroform-*d*)  $\delta$  8.08 (d,  $J$  = 8.5 Hz, 1H), 7.30 - 7.23 (m, 6H), 7.20 (d,  $J$  = 8.9 Hz, 1H), 7.06 (d,  $J$  = 8.0 Hz, 2H), 6.35 (s, 1H), 2.40 (s, 3H), 2.33 (s, 3H), 2.31 (s, 3H), 2.24 (s, 3H);  $^{13}\text{C}$  NMR (101 MHz, Chloroform-*d*)  $\delta$  168.6, 144.6, 142.4, 141.0, 137.7, 136.9, 134.8, 131.9, 131.1, 129.5, 129.2, 127.6, 127.3, 126.8, 125.1, 124.1, 114.1, 109.1, 21.5, 21.3, 20.5, 15.7. HRMS (ESI)  $m/z$ :  $[\text{M} + \text{Na}]^+$  calculated for  $\text{C}_{25}\text{H}_{23}\text{NNaO}_4\text{S}$  456.1245; Found 456.1240.

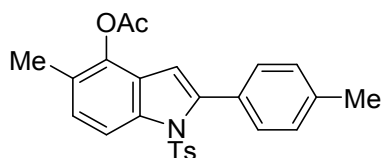

**5-methyl-2-(*p*-tolyl)-1-tosyl-1*H*-indol-4-yl acetate (11)**

Amorphous yellow solid, yield 65% (28 mg). Mp.57.4 - 58.2 °C. <sup>1</sup>H NMR (400 MHz, Chloroform-*d*) δ 8.07 (d, *J* = 8.5 Hz, 1H), 7.35 (d, *J* = 8.1 Hz, 2H), 7.27 (d, *J* = 8.4 Hz, 2H), 7.22 - 7.16 (m, 3H), 7.05 (d, *J* = 8.1 Hz, 2H), 6.33 (s, 1H), 2.42 (s, 3H), 2.33 (s, 3H), 2.29 (s, 3H), 2.23 (s, 3H); <sup>13</sup>C NMR (101 MHz, Chloroform-*d*) δ 168.6, 144.6, 142.4, 141.0, 138.8, 137.7, 134.7, 130.3, 129.3, 129.1, 128.2, 127.2, 126.8, 125.2, 124.2, 114.2, 109.1, 21.5, 21.4, 20.5, 15.7. HRMS (ESI) *m/z*: [M + Na]<sup>+</sup> calculated for C<sub>25</sub>H<sub>23</sub>NNaO<sub>4</sub>S 456.1245; Found 456.1240.

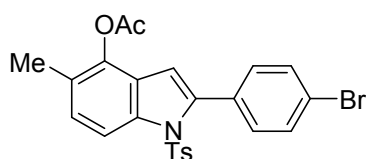

**2-(4-bromophenyl)-5-methyl-1-tosyl-1*H*-indol-4-yl acetate (12)**

Amorphous red solid, yield 68% (34 mg). Mp.169.7 – 170.5 °C. <sup>1</sup>H NMR (400 MHz, Chloroform-*d*) δ 8.07 (d, *J* = 8.5 Hz, 1H), 7.53 (d, *J* = 8.4 Hz, 2H), 7.33 (d, *J* = 8.3 Hz, 2H), 7.25 (d, *J* = 8.1 Hz, 2H), 7.21 (d, *J* = 8.6 Hz, 1H), 7.06 (d, *J* = 8.0 Hz, 2H), 6.37 (s, 1H), 2.32 (s, 3H), 2.29 (s, 3H), 2.23 (s, 3H); <sup>13</sup>C NMR (101 MHz, Chloroform-*d*) δ 168.5, 144.9, 141.1, 140.9, 137.7, 134.4, 131.8, 130.9, 130.7, 129.4, 127.7, 126.7, 125.4, 124.0, 123.2, 114.2, 109.8, 21.5, 20.5, 15.7. HRMS (ESI) *m/z*: [M + Na]<sup>+</sup> calculated for C<sub>24</sub>H<sub>20</sub>BrNO<sub>4</sub>SNa 520.0194; Found 520.0186.

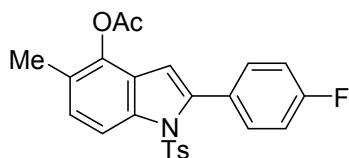

**2-(4-fluorophenyl)-5-methyl-1-tosyl-1*H*-indol-4-yl acetate (13)**

Amorphous white solid, yield 80% (35 mg). Mp.155.0 - 155.8 °C. <sup>1</sup>H NMR (400 MHz, Chloroform-*d*) δ 8.08 (d, *J* = 8.6 Hz, 1H), 7.44 - 7.39 (m, 2H), 7.26 - 7.24 (m, 2H), 7.21 (dd, *J* = 8.5, 0.7 Hz, 1H), 7.11 - 7.05 (m, 4H), 6.34 (s, 1H), 2.33 (s, 3H), 2.30 (s, 3H), 2.24 (s, 3H). <sup>13</sup>C NMR (101 MHz, Chloroform-*d*) δ 168.6, 163.1 (d, *J* = 249.0 Hz), 144.8, 141.1, 141.0, 137.7, 134.7, 132.3 (d, *J* = 8.2 Hz), 129.4, 128.0, 127.6, 126.7, 125.3, 124.0, 114.5 (d, *J* = 21.6 Hz), 114.1, 109.4, 21.5, 20.5, 15.7. HRMS (ESI) *m/z*: [M + Na]<sup>+</sup> calculated for C<sub>24</sub>H<sub>20</sub>FNNaO<sub>4</sub>S 460.0995; Found 460.0990.

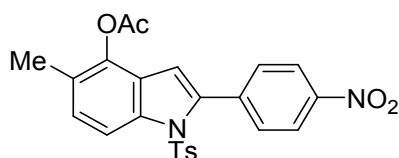

**5-methyl-2-(4-nitrophenyl)-1-tosyl-1*H*-indol-4-yl acetate (14)**

Amorphous yellow solid, yield 55% (26 mg). Mp.195.2 - 196.0 °C. <sup>1</sup>H NMR (400 MHz, Chloroform-*d*) δ 8.28 (d, *J* = 8.7 Hz, 2H), 8.08 (d, *J* = 8.5 Hz, 1H), 7.768 (d, *J* = 8.7 Hz, 2H), 7.28 - 7.23 (m, 3H), 7.08 (d, *J* = 8.0 Hz, 2H), 6.51 (s, 1H), 2.35 (s, 3H), 2.31 (s, 3H), 2.25 (s, 3H). <sup>13</sup>C NMR (101 MHz,



Chloroform-*d*)  $\delta$  168.5, 147.7, 145.2, 141.4, 139.7, 138.5, 138.2, 134.0, 130.9, 129.5, 128.6, 126.6, 125.9, 124.0, 122.8, 114.3, 111.8, 21.5, 20.5, 15.7. HRMS (ESI)  $m/z$ :  $[M + Na]^+$  calculated for  $C_{24}H_{20}N_2NaO_6S$  487.0940; Found 487.0935.

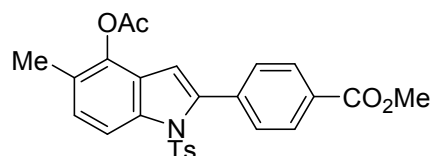

**Methyl 4-(4-acetoxy-5-methyl-1-tosyl-1H-indol-2-yl)benzoate (15)**

Amorphous White solid, yield 50% (24 mg). Mp.211.6 - 212.1 °C.  $^1H$  NMR (400 MHz, Chloroform-*d*)  $\delta$  8.09-8.07 (m, 3H), 7.56 (d,  $J = 8.0$  Hz, 2H), 7.27 - 7.21 (m, 3H), 7.06 (d,  $J = 8.1$  Hz, 2H), 6.44 (s, 1H), 3.96 (s, 3H), 2.33 (s, 3H), 2.29 (s, 3H), 2.24 (s, 3H);  $^{13}C$  NMR (101 MHz, Chloroform-*d*)  $\delta$  168.5, 166.7, 144.9, 141.2, 141.1, 138.0, 136.5, 134.3, 130.2, 130.1, 129.4, 128.7, 128.0, 126.7, 125.5, 124.1, 114.2, 110.6, 52.2, 21.5, 20.5, 15.7. HRMS (ESI)  $m/z$ :  $[M + Na]^+$  calculated for  $C_{26}H_{23}NNaO_6S$  500.1144; Found 500.1139.

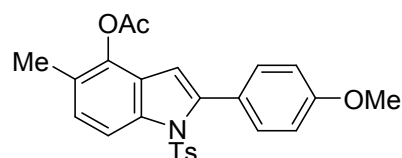

**2-(4-methoxyphenyl)-5-methyl-1-tosyl-1H-indol-4-yl acetate (16)**

Amorphous yellow solid, yield 57% (26 mg). Mp.99.1 - 100.0 °C.  $^1H$  NMR (400 MHz, Chloroform-*d*)  $\delta$  8.08 (d,  $J = 8.5$  Hz, 1H), 7.37 (d,  $J = 8.8$  Hz, 2H), 7.26 (d,  $J = 8.1$  Hz, 2H), 7.18 (d,  $J = 8.6$  Hz, 1H), 7.05 (d,  $J = 8.1$  Hz, 2H), 6.93 (d,  $J = 8.8$  Hz, 2H), 6.30 (s, 1H), 3.87 (s, 3H), 2.32 (s, 3H), 2.29 (s, 3H), 2.23 (s, 3H);  $^{13}C$  NMR (101 MHz, Chloroform-*d*)  $\delta$  168.6, 160.1, 144.6, 142.2, 140.9, 137.6, 134.8, 131.8, 129.3, 127.1, 126.8, 125.2, 124.3, 124.2, 114.2, 112.9, 108.7, 55.3, 21.5, 20.5, 15.7. HRMS (ESI)  $m/z$ :  $[M + Na]^+$  calculated for  $C_{25}H_{23}NNaO_5S$  472.1195; Found 472.1190.

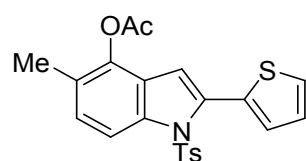

**5-methyl-2-(thiophen-2-yl)-1-tosyl-1H-indol-4-yl acetate (17)**

Green liquid, yield 58% (25 mg).  $^1H$  NMR (400 MHz, Chloroform-*d*)  $\delta$  8.10 (d,  $J = 8.5$  Hz, 1H), 7.39 (d,  $J = 5.0$  Hz, 1H), 7.32 (d,  $J = 8.0$  Hz, 2H), 7.29 (d,  $J = 3.4$  Hz, 1H), 7.21 (d,  $J = 8.6$  Hz, 1H), 7.11 - 7.05 (m, 3H), 6.46 (s, 1H), 2.34 (s, 3H), 2.30 (s, 3H), 2.24 (s, 3H);  $^{13}C$  NMR (101 MHz, Chloroform-*d*)  $\delta$  168.6, 144.8, 141.0, 137.7, 134.9, 134.1, 131.8, 130.9, 129.4, 127.8, 127.2, 126.9, 126.8, 125.1, 123.5, 114.0, 110.2, 21.5, 20.5, 15.6. HRMS (ESI)  $m/z$ :  $[M + Na]^+$  calculated for  $C_{22}H_{19}NNaO_4S_2$  448.0653; Found 448.0648.

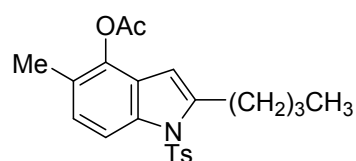

**2-butyl-5-methyl-1-tosyl-1H-indol-4-yl acetate (18)**

Amorphous brown solid, yield 60% (24 mg). Mp.164.0 - 164.7 °C. <sup>1</sup>H NMR (400 MHz, Chloroform-*d*) δ 7.94 (d, *J* = 8.5 Hz, 1H), 7.62 (d, *J* = 8.4 Hz, 2H), 7.19 (d, *J* = 8.1 Hz, 2H), 7.09 (d, *J* = 8.6 Hz, 1H), 6.19 (d, *J* = 1.0 Hz, 1H), 2.94 (t, *J* = 7.2 Hz, 2H), 2.37 (s, 3H), 2.34 (s, 3H), 2.21 (s, 3H), 1.70 (m, 2H), 1.43 (m, 2H), 0.95 (t, *J* = 7.4 Hz, 3H); <sup>13</sup>C NMR (101 MHz, Chloroform-*d*) δ 168.7, 144.7, 142.9, 140.6, 136.8, 136.1, 129.8, 126.3, 126.3, 124.3, 123.4, 112.5, 104.3, 30.8, 28.7, 22.5, 21.5, 20.6, 15.6, 13.9. HRMS (ESI) *m/z*: [M + Na]<sup>+</sup> calculated for C<sub>22</sub>H<sub>25</sub>NNaO<sub>4</sub>S 422.1402; Found 422.1397.

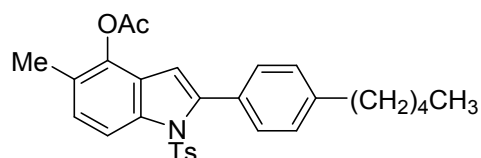**5-methyl-2-(4-pentylphenyl)-1-tosyl-1H-indol-4-yl acetate (19)**

Yellow liquid, yield 67% (28 mg). <sup>1</sup>H NMR (400 MHz, Chloroform-*d*) δ 8.07 (d, *J* = 8.5 Hz, 1H), 7.36 (d, *J* = 8.1 Hz, 2H), 7.26 (d, *J* = 7.8 Hz, 2H), 7.23 - 7.15 (m, 3H), 7.04 (d, *J* = 8.0 Hz, 2H), 6.33 (s, 1H), 2.67 (t, *J* = 7.7 Hz, 2H), 2.32 (s, 3H), 2.29 (s, 3H), 2.23 (s, 3H), 1.68 (m, 2H), 1.40 - 1.33 (m, 4H), 0.92 (t, *J* = 6.6 Hz, 3H). <sup>13</sup>C NMR (101 MHz, Chloroform-*d*) δ 168.6, 144.6, 143.8, 142.5, 141.0, 137.7, 134.8, 130.3, 129.2, 129.2, 127.5, 127.2, 126.8, 125.1, 124.2, 114.2, 109.0, 35.8, 31.5, 31.0, 22.5, 21.5, 20.5, 15.7, 14.0. HRMS (ESI) *m/z*: [M + Na]<sup>+</sup> calculated for C<sub>24</sub>H<sub>20</sub>NNaO<sub>4</sub>S 441.1011; Found 441.1006.

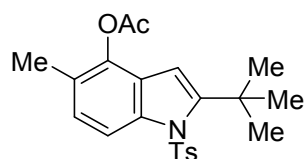**2-(tert-butyl)-5-methyl-1-tosyl-1H-indol-4-yl acetate (20)**

Amorphous green solid, yield 67% (27 mg). Mp.45.7 - 46.5 °C. <sup>1</sup>H NMR (400 MHz, Chloroform-*d*) δ 7.79 (d, *J* = 8.6 Hz, 1H), 7.42 (d, *J* = 8.4 Hz, 2H), 7.12 (d, *J* = 8.3 Hz, 2H), 7.02 (d, *J* = 8.6 Hz, 1H), 6.40 (s, 1H), 2.38 (s, 3H), 2.30 (s, 3H), 2.17 (s, 3H), 1.56 (s, 9H); <sup>13</sup>C NMR (101 MHz, Chloroform-*d*) δ 168.7, 153.1, 144.2, 140.8, 138.6, 136.9, 129.6, 126.7, 125.9, 124.4, 122.7, 113.7, 106.2, 35.0, 31.2, 21.4, 20.6, 15.6. HRMS (ESI) *m/z*: [M + Na]<sup>+</sup> calculated for C<sub>22</sub>H<sub>25</sub>NNaO<sub>4</sub>S 422.1402; Found 422.1397.

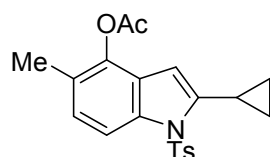**2-cyclopropyl-5-methyl-1-tosyl-1H-indol-4-yl acetate (21)**

Amorphous brown solid, yield 52% (20 mg). Mp.42.0 - 42.7 °C. <sup>1</sup>H NMR (400 MHz, Chloroform-*d*) δ 7.98 (d, *J* = 8.6 Hz, 1H), 7.71 (d, *J* = 8.4 Hz, 2H), 7.21 (d, *J* = 8.1 Hz, 2H), 7.10 (d, *J* = 8.6 Hz, 1H), 5.99 (s, 1H), 2.44 - 2.37 (m, 1H), 2.35 (s, 3H), 2.35 (s, 3H), 2.21 (s, 3H), 0.98 - 0.91 (m, 2H), 0.61 - 0.55 (m, 2H); <sup>13</sup>C NMR (101 MHz, Chloroform-*d*) δ 168.7, 144.7, 144.4, 140.7, 137.0, 136.4, 129.7, 126.7, 126.4, 124.2, 122.9, 112.2, 101.9, 21.5, 20.6, 15.6, 9.4, 8.3. HRMS (ESI) *m/z*: [M + Na]<sup>+</sup> calculated for C<sub>21</sub>H<sub>21</sub>NNaO<sub>4</sub>S 406.1089; Found 406.1084.

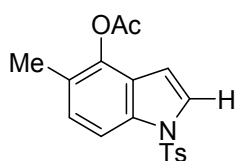

**5-methyl-1-tosyl-1H-indol-4-yl acetate (22)**

Amorphous white solid, yield 56% (19 mg). Mp.114.7 - 115.2 °C. <sup>1</sup>H NMR (400 MHz, Chloroform-*d*) δ 7.79 - 7.72 (m, 3H), 7.50 (d, *J* = 3.7 Hz, 1H), 7.21 (d, *J* = 8.0 Hz, 2H), 7.15 (d, *J* = 8.4 Hz, 1H), 6.47 (d, *J* = 3.7 Hz, 1H), 2.36 (s, 3H), 2.32 (s, 3H), 2.21 (s, 3H); <sup>13</sup>C NMR (101 MHz, Chloroform-*d*) δ 168.6, 145.1, 141.5, 135.1, 134.4, 129.9, 127.4, 126.8, 126.5, 124.4, 124.2, 111.2, 105.1, 21.5, 20.5, 15.6. HRMS (ESI) *m/z*: [M + Na]<sup>+</sup> calculated for C<sub>18</sub>H<sub>17</sub>NNaO<sub>4</sub>S 366.0776; Found 366.0771.

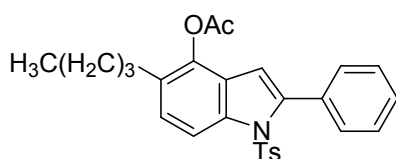

**5-butyl-2-phenyl-1-tosyl-1H-indol-4-yl acetate (23)**

Amorphous white solid, yield 63% (29 mg). Mp.117.2 - 118.0 °C. <sup>1</sup>H NMR (400 MHz, Chloroform-*d*) δ 8.11 (d, *J* = 8.5 Hz, 1H), 7.47 - 7.36 (m, 5H), 7.27 (d, *J* = 8.1 Hz, 2H), 7.21 (d, *J* = 8.6 Hz, 1H), 7.06 (d, *J* = 8.0 Hz, 2H), 6.33 (s, 1H), 2.57 (t, *J* = 7.7 Hz, 2H), 2.33 (s, 3H), 2.30 (s, 3H), 1.56 (m, 2H), 1.35 (m, 2H), 0.93 (t, *J* = 7.3 Hz, 3H); <sup>13</sup>C NMR (101 MHz, Chloroform-*d*) <sup>13</sup>C NMR (101 MHz, CDCl<sub>3</sub>) δ 168.9, 144.7, 142.1, 140.7, 137.6, 134.8, 132.0, 130.5, 129.8, 129.3, 128.8, 127.4, 126.8, 126.6, 124.1, 114.2, 109.5, 32.5, 29.4, 22.5, 21.5, 20.6, 13.9. HRMS (ESI) *m/z*: [M + Na]<sup>+</sup> calculated for C<sub>27</sub>H<sub>27</sub>NNaO<sub>4</sub>S 484.1558; Found 484.1553.

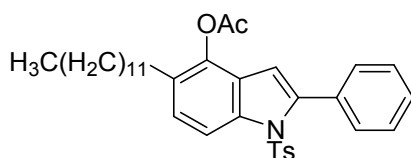

**5-dodecyl-2-phenyl-1-tosyl-1H-indol-4-yl acetate (24)**

White liquid, yield 55% (22 mg). <sup>1</sup>H NMR (400 MHz, Chloroform-*d*) δ 8.11 (d, *J* = 8.5 Hz, 1H), 7.47 - 7.35 (m, 5H), 7.27 (d, *J* = 8.0 Hz, 2H), 7.21 (d, *J* = 8.6 Hz, 1H), 7.05 (d, *J* = 8.0 Hz, 2H), 6.33 (s, 1H), 2.56 (t, *J* = 7.7 Hz, 2H), 2.32 (s, 3H), 2.29 (s, 3H), 1.63 - 1.52 (m, 2H), 1.31 - 1.24 (m, 18H), 0.88 (t, *J* = 6.7 Hz, 3H). <sup>13</sup>C NMR (101 MHz, Chloroform-*d*) δ 168.8, 144.7, 142.1, 140.7, 137.6, 134.8, 132.0, 130.5, 129.8, 129.3, 128.7, 127.4, 126.8, 126.6, 124.1, 114.2, 109.5, 31.9, 30.3, 29.8, 29.6, 29.6, 29.6, 29.4, 29.4, 29.3, 22.7, 21.5, 20.6, 14.1. HRMS (ESI) *m/z*: [M + Na]<sup>+</sup> calculated for C<sub>35</sub>H<sub>43</sub>NNaO<sub>4</sub>S 596.2810; Found 596.2805.

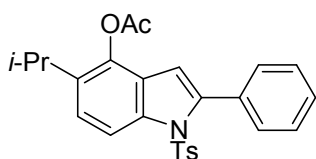

**5-isopropyl-2-phenyl-1-tosyl-1H-indol-4-yl acetate (25)**

Amorphous yellow solid, yield 84% (36 mg). Mp.137.5 - 138.2 °C. <sup>1</sup>H NMR (400 MHz, Chloroform-*d*) δ 8.15 (d, *J* = 8.8 Hz, 1H), 7.44 - 7.35 (m, 5H), 7.31 - 7.26 (m, 3H), 7.06 (d, *J* = 8.1 Hz, 2H), 6.32 (d, *J* = 0.7 Hz, 1H), 3.08 (hept, *J* = 6.9 Hz, 1H), 2.33 (s, 3H), 2.30 (s, 3H), 1.25 (d, *J* = 6.9 Hz, 6H); <sup>13</sup>C NMR (101 MHz, Chloroform-*d*) δ 169.0, 144.7, 142.0, 139.8, 137.3, 135.4, 135.0, 132.0, 130.5, 129.3, 128.7, 127.4, 126.9, 123.9, 123.1, 114.5, 109.4, 27.2, 23.3, 21.5, 20.6. HRMS (ESI) *m/z*: [M + Na]<sup>+</sup> calculated for C<sub>26</sub>H<sub>25</sub>NNaO<sub>4</sub>S 470.1402; Found 470.1396.

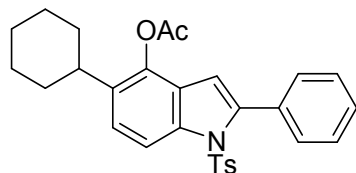

#### 5-cyclohexyl-2-phenyl-1-tosyl-1H-indol-4-yl acetate (26)

Amorphous white solid, yield 56% (19 mg). Mp.114.7 - 115.2 °C. <sup>1</sup>H NMR (400 MHz, Chloroform-*d*) δ 8.14 (d, *J* = 8.0 Hz, 1H), 7.43 - 7.37 (m, 5H), 7.29-7.26 (m, 3H), 7.06 (d, *J* = 8.0 Hz, 2H), 6.32 (s, 1H), 2.68-2.62 (m, 1H), 2.34 (s, 3H), 2.31 (s, 3H), 1.87-1.75 (m, 4H), 1.55-1.23 (m, 6H); <sup>13</sup>C NMR (101 MHz, Chloroform-*d*) δ 169.09, 144.66, 141.93, 139.90, 137.24, 134.98, 134.54, 132.00, 130.52, 129.32, 128.74, 127.38, 126.88, 123.88, 123.68, 114.39, 109.47, 37.78, 33.60, 27.02, 26.15, 21.53, 20.63. HRMS (ESI) *m/z*: [M + Na]<sup>+</sup> calculated for C<sub>29</sub>H<sub>29</sub>NNaO<sub>4</sub>S 510.1715; Found 510.1710.

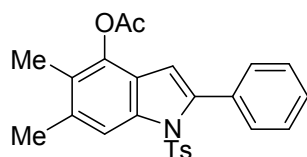

#### 5,6-dimethyl-2-phenyl-1-tosyl-1H-indol-4-yl acetate (27)

Amorphous yellow solid, yield 75% (33 mg). Mp.181.7 - 182.2 °C. <sup>1</sup>H NMR (400 MHz, Chloroform-*d*) δ 8.02 (s, 1H), 7.47 - 7.35 (m, 5H), 7.26 (d, *J* = 8.4 Hz, 2H), 7.05 (d, *J* = 7.9 Hz, 2H), 6.32 (s, 1H), 2.45 (s, 3H), 2.33 (s, 3H), 2.29 (s, 3H), 2.12 (s, 3H); <sup>13</sup>C NMR (101 MHz, Chloroform-*d*) δ 168.8, 144.6, 141.3, 140.9, 137.2, 135.1, 134.8, 132.1, 130.4, 129.3, 128.6, 127.4, 126.8, 124.4, 122.0, 115.1, 109.5, 21.5, 21.1, 20.6, 12.4. HRMS (ESI) *m/z*: [M + Na]<sup>+</sup> calculated for C<sub>25</sub>H<sub>23</sub>NNaO<sub>4</sub>S 456.1245; Found 456.1240.

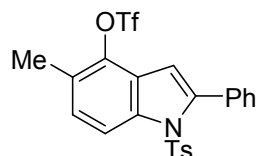

#### 5-methyl-2-phenyl-1-tosyl-1H-indol-4-yl trifluoromethanesulfonate (28)

Amorphous white solid, yield 58% (30 mg). Mp.113.9 - 114.7 °C. <sup>1</sup>H NMR (400 MHz, Chloroform-*d*) δ 8.23 (d, *J* = 8.5 Hz, 1H), 7.50 - 7.38 (m, 5H), 7.27 - 7.20 (m, 3H), 7.07 (d, *J* = 8.0 Hz, 2H), 6.60 (s, 1H), 2.44 (s, 3H), 2.31 (s, 3H); <sup>13</sup>C NMR (101 MHz, Chloroform-*d*) δ 145.1, 143.5, 139.0, 138.1, 134.4, 131.3, 130.6, 129.4, 129.2, 127.8, 127.5, 126.8, 126.4, 124.3, 118.6 (q, *J* = 319.8 Hz), 116.4, 108.7, 21.5, 16.1. HRMS (ESI) *m/z*: [M + Na]<sup>+</sup> calculated for C<sub>23</sub>H<sub>18</sub>F<sub>3</sub>NNaO<sub>5</sub>S<sub>2</sub> 532.0476; Found 532.0471.

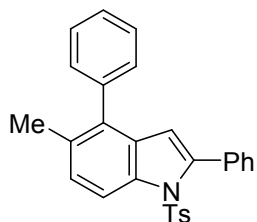

**5-methyl-2,4-diphenyl-1-tosyl-1H-indole (29)**

Amorphous white solid, yield 74% (32 mg). Mp.165.3 - 166.0 °C.  $^1\text{H}$  NMR (400 MHz, Chloroform-*d*)  $\delta$  8.18 (d,  $J$  = 8.5 Hz, 1H), 7.44 - 7.23 (m, 13H), 7.05 (d,  $J$  = 8.0 Hz, 2H), 6.24 (s, 1H), 2.29 (s, 3H), 2.26 (s, 3H);  $^{13}\text{C}$  NMR (101 MHz, Chloroform-*d*)  $\delta$  144.4, 141.8, 138.7, 136.4, 134.8, 133.6, 132.4, 131.1, 130.4, 130.2, 129.7, 129.2, 128.5, 128.2, 127.3, 127.2, 127.0, 126.8, 115.2, 113.3, 21.5, 19.7. HRMS (ESI)  $m/z$ :  $[\text{M} + \text{Na}]^+$  calculated for  $\text{C}_{28}\text{H}_{23}\text{NNaO}_2\text{S}$  460.1347; Found 460.1342.

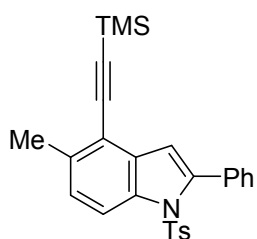

**5-methyl-2-phenyl-1-tosyl-4-((trimethylsilyl)ethynyl)-1H-indole (30)**

Amorphous white solid, yield 55% (25 mg). Mp.136.5 - 137.2 °C.  $^1\text{H}$  NMR (400 MHz, Chloroform-*d*)  $\delta$  8.15 (d,  $J$  = 8.5 Hz, 1H), 7.56 - 7.42 (m, 5H), 7.24 (d,  $J$  = 8.0 Hz, 2H), 7.17 (d,  $J$  = 8.5 Hz, 1H), 7.03 (d,  $J$  = 8.0 Hz, 2H), 6.68 (s, 1H), 2.50 (s, 3H), 2.28 (s, 3H), 0.24 (s, 9H);  $^{13}\text{C}$  NMR (101 MHz, Chloroform-*d*)  $\delta$  144.6, 142.6, 137.0, 136.0, 134.5, 132.7, 132.3, 130.4, 129.2, 128.7, 127.5, 126.8, 126.2, 116.7, 114.3, 113.2, 101.8, 101.3, 21.5, 20.1, 0.1. HRMS (ESI)  $m/z$ :  $[\text{M} + \text{Na}]^+$  calculated for  $\text{C}_{27}\text{H}_{27}\text{NNaO}_2\text{SSi}$  480.1429; Found 480.1424.

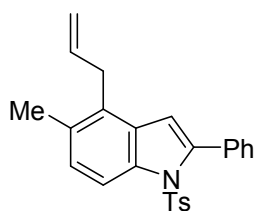

**4-allyl-5-methyl-2-phenyl-1-tosyl-1H-indole (31)**

Amorphous yellow solid, yield 82% (33 mg). Mp.126.9 - 127.8 °C.  $^1\text{H}$  NMR (400 MHz, Chloroform-*d*)  $\delta$  8.05 (d,  $J$  = 8.5 Hz, 1H), 7.53 - 7.39 (m, 5H), 7.27 (d,  $J$  = 8.0 Hz, 2H), 7.15 (d,  $J$  = 8.4 Hz, 1H), 7.03 (d,  $J$  = 8.0 Hz, 2H), 6.54 (s, 1H), 5.85 (ddt,  $J$  = 16.3, 11.0, 5.8 Hz, 1H), 4.92 (d,  $J$  = 10.1 Hz, 1H), 4.76 (d,  $J$  = 17.1 Hz, 1H), 3.48 (d,  $J$  = 5.8 Hz, 2H), 2.34 (s, 3H), 2.27 (s, 3H);  $^{13}\text{C}$  NMR (101 MHz, Chloroform-*d*)  $\delta$  144.3, 141.8, 136.8, 135.4, 134.6, 132.6, 131.9, 130.6, 130.2, 129.3, 129.1, 128.5, 127.4, 127.4, 126.8, 115.2, 114.5, 112.3, 33.8, 21.5, 18.7. HRMS (ESI)  $m/z$ :  $[\text{M} + \text{Na}]^+$  calculated for  $\text{C}_{25}\text{H}_{23}\text{NNaO}_2\text{S}$  424.1347; Found 424.1342.

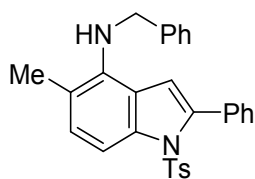

**N-benzyl-5-methyl-2-phenyl-1-tosyl-1H-indol-4-amine (32)**

Amorphous green solid, yield 52% (24 mg). Mp.149.3 - 150.2 °C.  $^1\text{H}$  NMR (400 MHz, Chloroform-*d*)  $\delta$  7.74 (d,  $J$  = 8.4 Hz, 1H), 7.51 - 7.39 (m, 5H), 7.31 - 7.21 (m, 7H), 7.09 - 7.02 (m, 3H), 6.65 (s, 1H), 4.45 (s, 2H), 2.29 (s, 3H), 2.16 (s, 3H);  $^{13}\text{C}$  NMR (101 MHz, Chloroform-*d*)  $\delta$  144.2, 140.2, 139.9, 139.4, 138.8, 134.5, 132.9, 130.1, 129.1, 128.6, 128.3, 127.8, 127.6, 127.4, 127.4, 126.9, 120.8, 119.9, 112.4, 108.3, 52.5, 21.5, 17.5. HRMS (ESI)  $m/z$ :  $[\text{M} + \text{Na}]^+$  calculated for  $\text{C}_{29}\text{H}_{26}\text{N}_2\text{NaO}_2\text{S}$  489.1613; Found 489.1608.

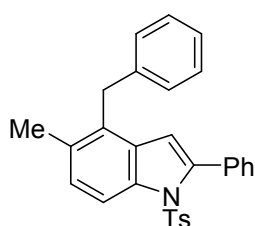

**4-benzyl-5-methyl-2-phenyl-1-tosyl-1H-indole (33)**

Amorphous yellow solid, yield 78% (35 mg). Mp.142.6 - 143.5 °C.  $^1\text{H}$  NMR (400 MHz, Chloroform-*d*)  $\delta$  8.10 (d,  $J$  = 8.5 Hz, 1H), 7.51 - 7.38 (m, 5H), 7.26 (d,  $J$  = 8.0 Hz, 2H), 7.20 - 7.10 (m, 4H), 7.03 (d,  $J$  = 8.0 Hz, 2H), 6.90 (d,  $J$  = 8.0 Hz, 2H), 6.52 (s, 1H), 4.11 (s, 2H), 2.30 (s, 3H), 2.27 (s, 3H);  $^{13}\text{C}$  NMR (101 MHz, Chloroform-*d*)  $\delta$  144.3, 142.3, 139.8, 137.0, 134.4, 132.6, 132.6, 131.4, 130.1, 130.1, 129.0, 128.5, 128.3, 128.0, 127.6, 127.4, 126.8, 125.8, 114.9, 112.7, 35.2, 21.5, 19.1. HRMS (ESI)  $m/z$ :  $[\text{M} + \text{Na}]^+$  calculated for  $\text{C}_{29}\text{H}_{25}\text{NNaO}_2\text{S}$  474.1504; Found 474.1499.

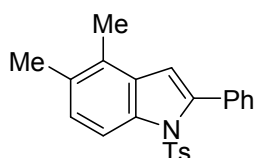

**4,5-dimethyl-2-phenyl-1-tosyl-1H-indole (34)**

Amorphous white solid, yield 81% (30 mg). Mp.146.8 - 147.5 °C.  $^1\text{H}$  NMR (400 MHz, Chloroform-*d*)  $\delta$  8.02 (d,  $J$  = 8.4 Hz, 1H), 7.52 - 7.40 (m, 5H), 7.28 (d,  $J$  = 8.2 Hz, 2H), 7.13 (d,  $J$  = 8.5 Hz, 1H), 7.03 (d,  $J$  = 8.1 Hz, 2H), 6.56 (s, 1H), 2.32 (s, 3H), 2.30 (s, 3H), 2.27 (s, 3H);  $^{13}\text{C}$  NMR (101 MHz, Chloroform-*d*)  $\delta$  144.3, 141.4, 136.4, 134.7, 132.7, 131.8, 130.5, 130.2, 129.1, 128.4, 127.9, 127.4, 127.0, 126.8, 113.6, 112.5, 21.5, 19.3, 15.2. HRMS (ESI)  $m/z$ :  $[\text{M} + \text{Na}]^+$  calculated for  $\text{C}_{23}\text{H}_{21}\text{NNaO}_2\text{S}$  398.1191; Found 398.1185.

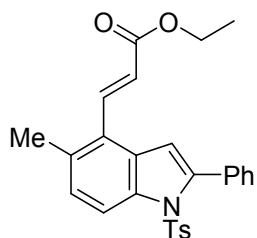

**1-(5-methyl-2-phenyl-1-tosyl-1H-indol-4-yl)pent-1-en-3-one (35)**

Amorphous yellow solid, yield 77% (35 mg). Mp. 136.7 - 137.2 °C.  $^1\text{H}$  NMR (400 MHz, Chloroform-*d*)  $\delta$  8.21 (d,  $J = 8.5$  Hz, 1H), 7.98 (d,  $J = 16.2$  Hz, 1H), 7.51 - 7.41 (m, 5H), 7.26 (d,  $J = 8.1$  Hz, 2H), 7.20 (d,  $J = 8.5$  Hz, 1H), 7.05 (d,  $J = 8.0$  Hz, 2H), 6.77 (s, 1H), 6.30 (d,  $J = 16.2$  Hz, 1H), 4.25 (q,  $J = 7.1$  Hz, 2H), 2.47 (s, 3H), 2.29 (s, 3H), 1.32 (t,  $J = 7.1$  Hz, 3H);  $^{13}\text{C}$  NMR (101 MHz, Chloroform-*d*)  $\delta$  166.9, 144.7, 143.1, 141.3, 137.1, 134.5, 133.7, 132.1, 130.3, 129.3, 129.3, 128.8, 127.5, 127.4, 126.8, 125.9, 122.5, 117.4, 112.5, 60.6, 21.5, 20.1, 14.3. HRMS (ESI)  $m/z$ :  $[\text{M} + \text{Na}]^+$  calculated for  $\text{C}_{28}\text{H}_{27}\text{NNaO}_4$  496.1558; Found 496.1553.

Copies of  $^1\text{H}$  and  $^{13}\text{C}$  spectra of products **2-35**

**5-methyl-2-phenyl-1-tosyl-1H-indol-4-yl acetate (2c)**

$^1\text{H}$  NMR (400 MHz,  $\text{CDCl}_3$ )

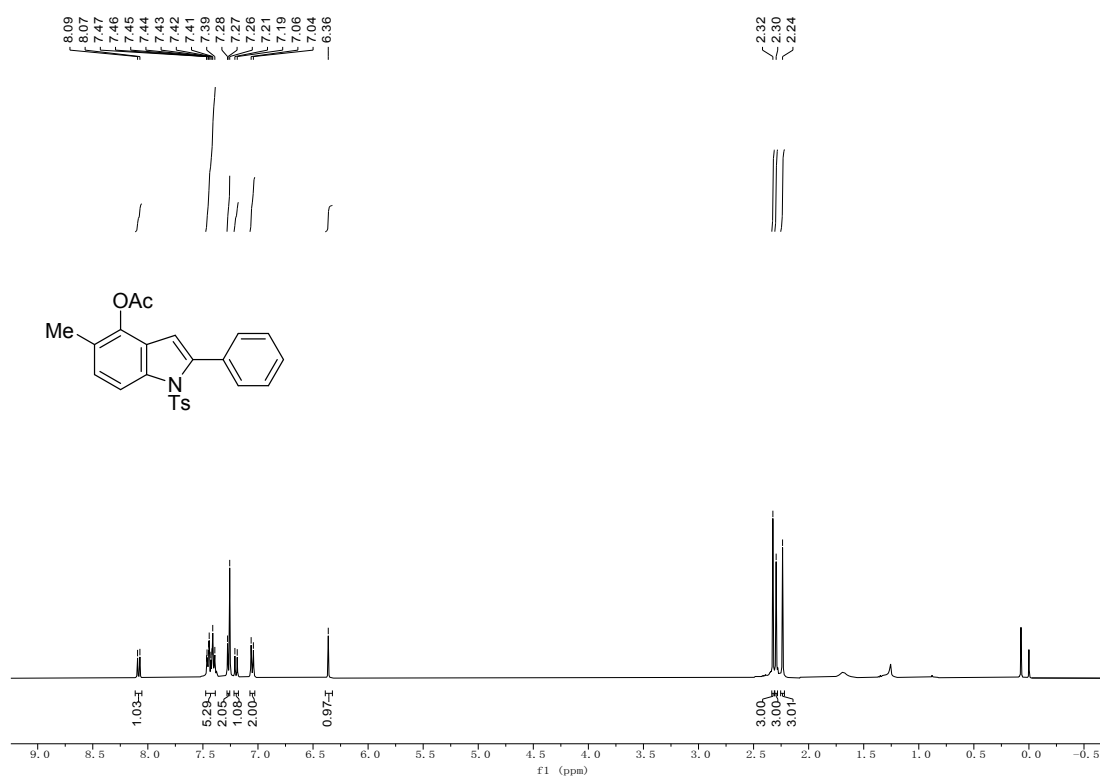

$^{13}\text{C}$  NMR (101 MHz,  $\text{CDCl}_3$ )

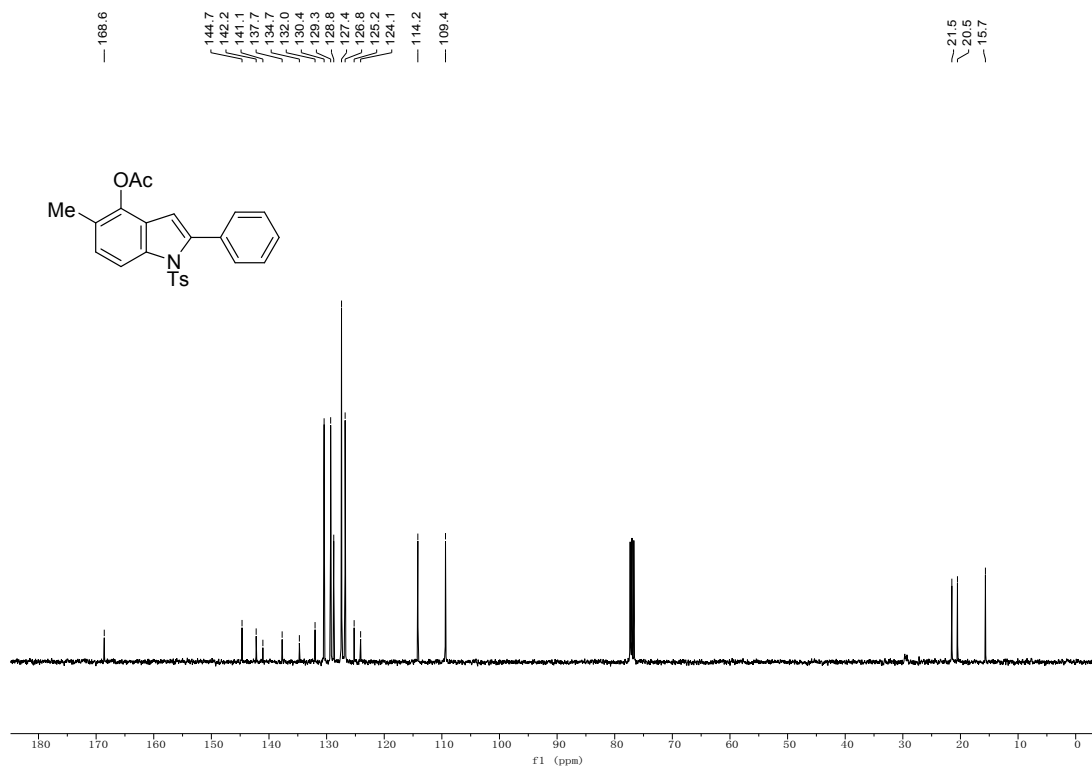

**5-methyl-1-(methylsulfonyl)-2-phenyl-1H-indol-4-yl acetate (3)**

$^1\text{H}$  NMR (400 MHz,  $\text{CDCl}_3$ )

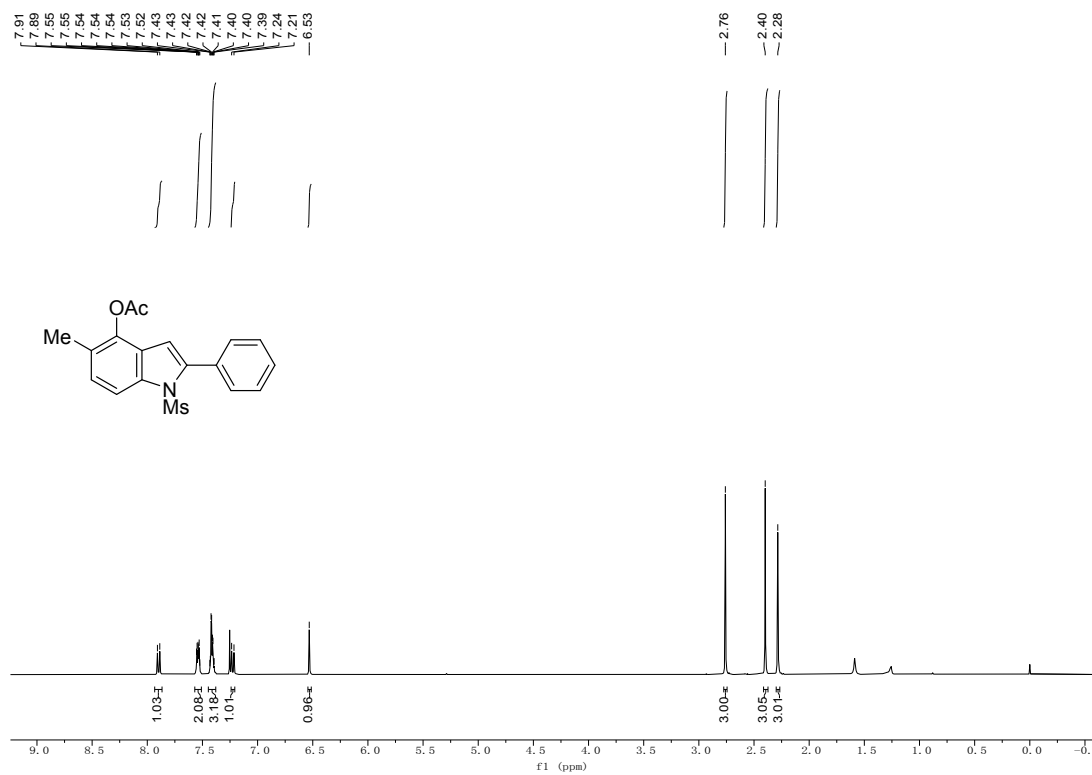

$^{13}\text{C}$  NMR (101 MHz,  $\text{CDCl}_3$ )



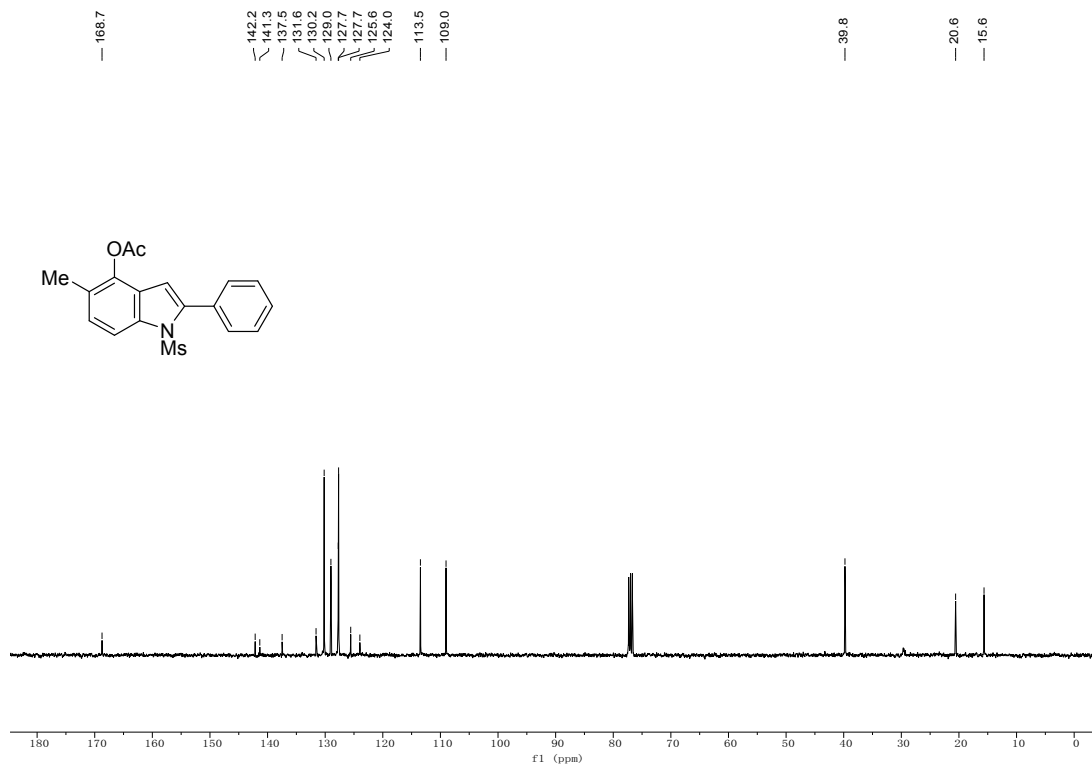

**2-(2-chlorophenyl)-5-methyl-1-tosyl-1H-indol-4-yl acetate (6)**

<sup>1</sup>H NMR (400 MHz, CDCl<sub>3</sub>)

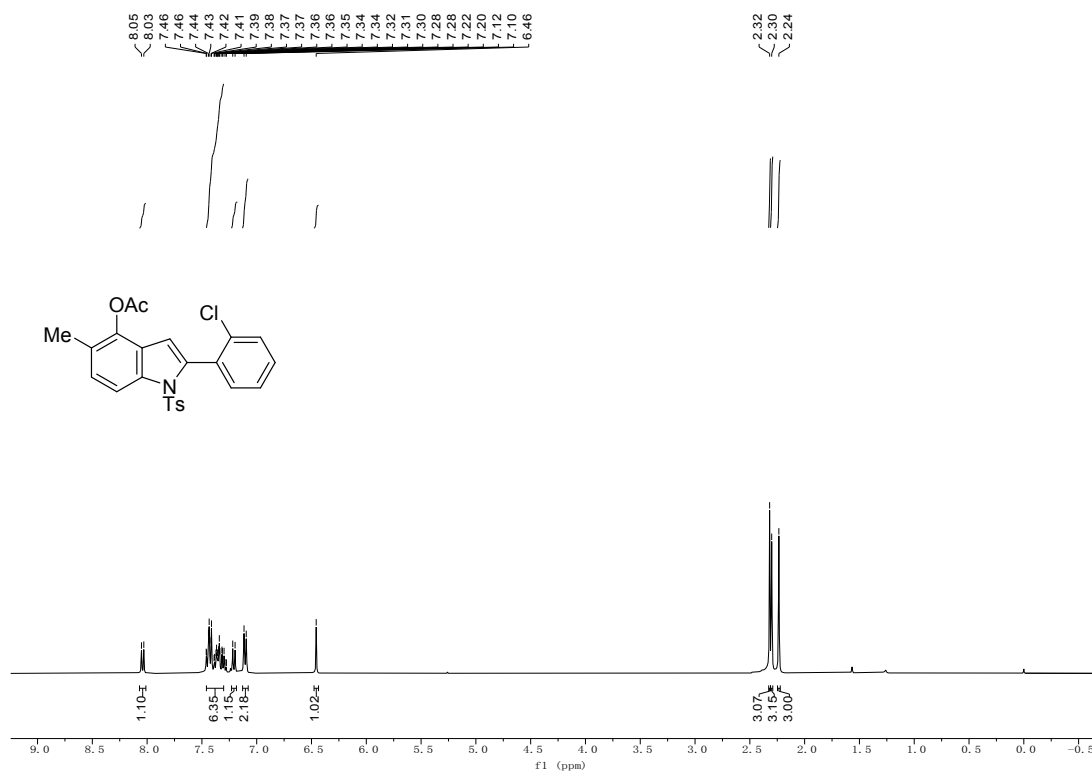

<sup>13</sup>C NMR (101 MHz, CDCl<sub>3</sub>)

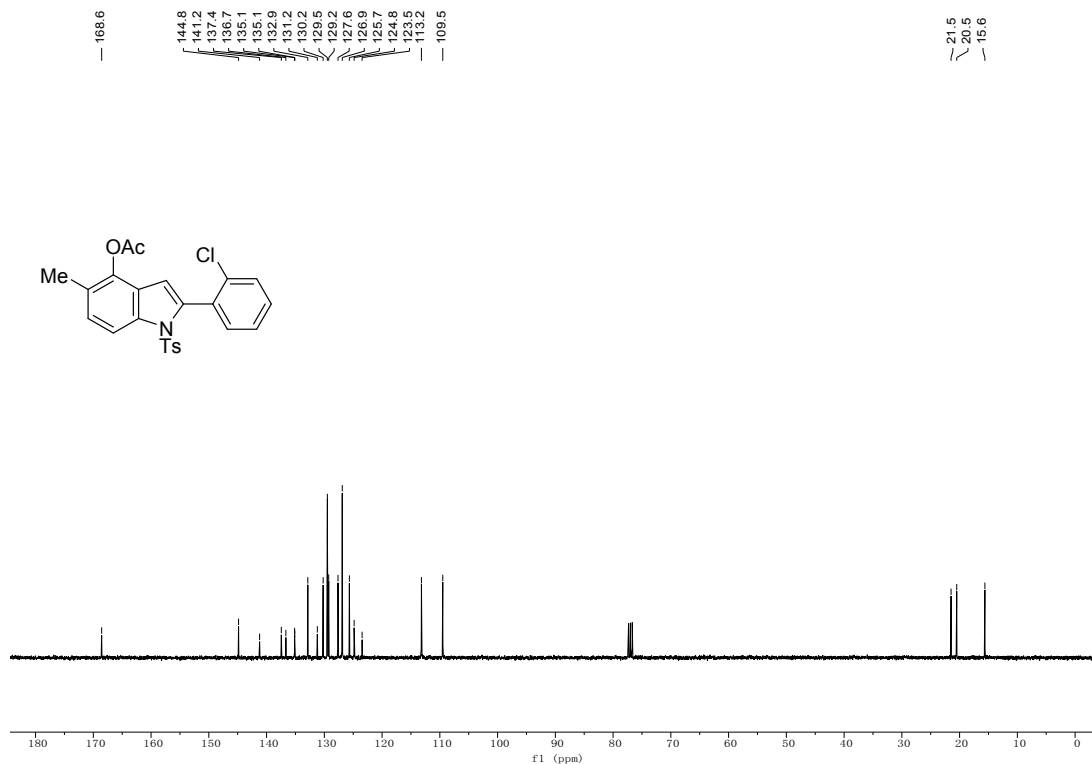

**2-(3-chlorophenyl)-5-methyl-1-tosyl-1H-indol-4-yl acetate (7)**

$^1\text{H}$  NMR (400 MHz,  $\text{CDCl}_3$ )

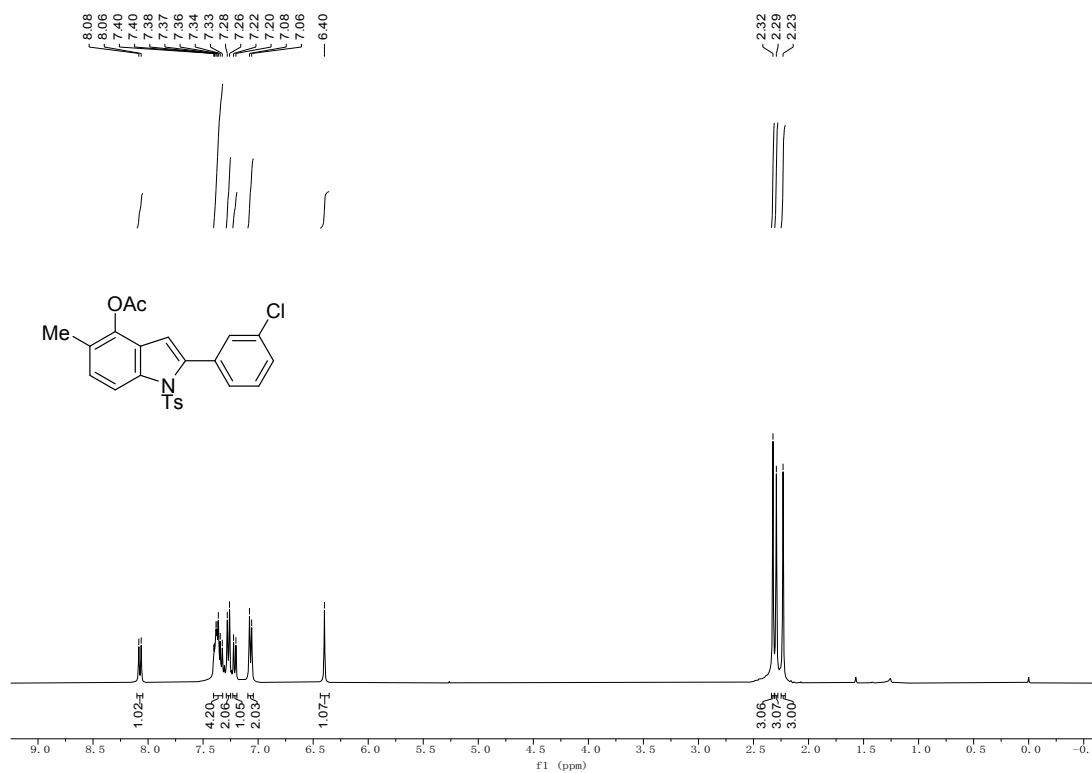

$^{13}\text{C}$  NMR (101 MHz,  $\text{CDCl}_3$ )

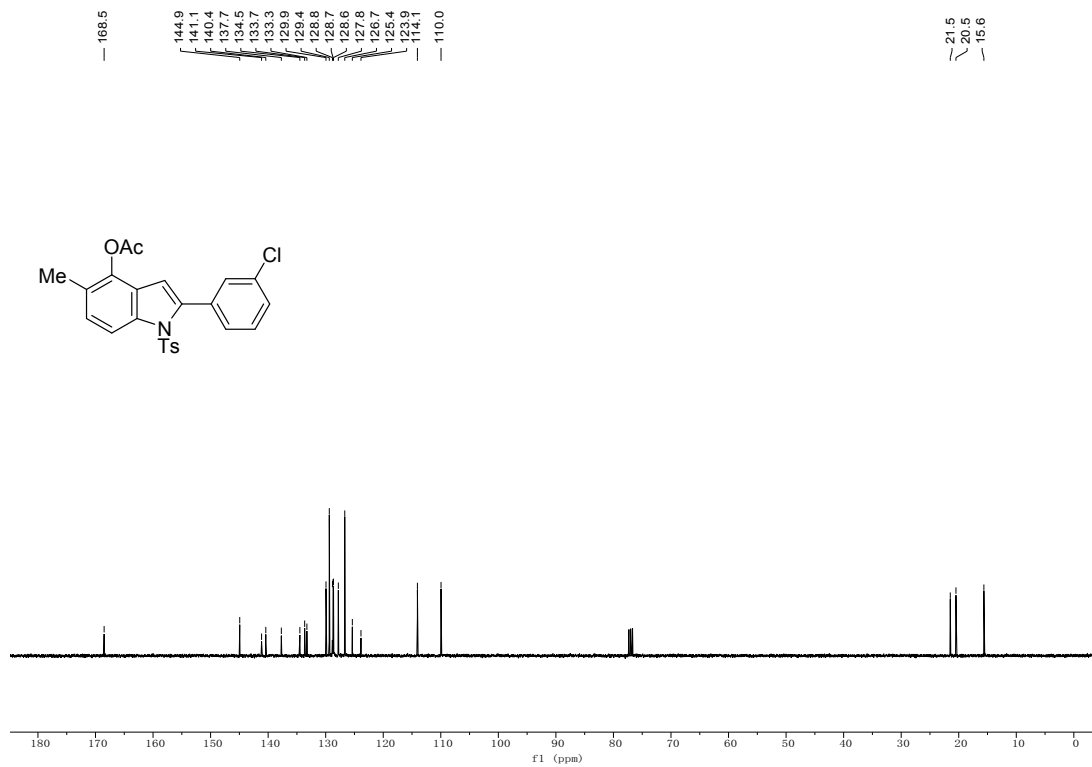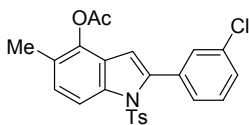

**2-(4-chlorophenyl)-5-methyl-1-tosyl-1H-indol-4-yl acetate (8)**

<sup>1</sup>H NMR (400 MHz, CDCl<sub>3</sub>)

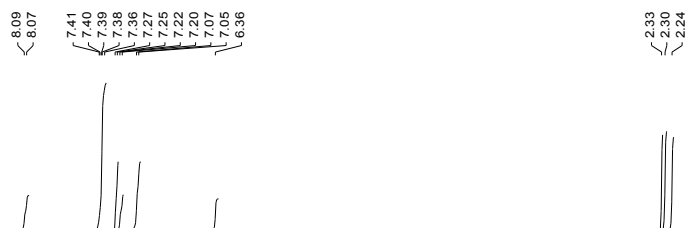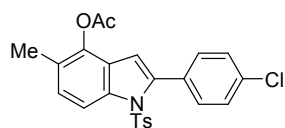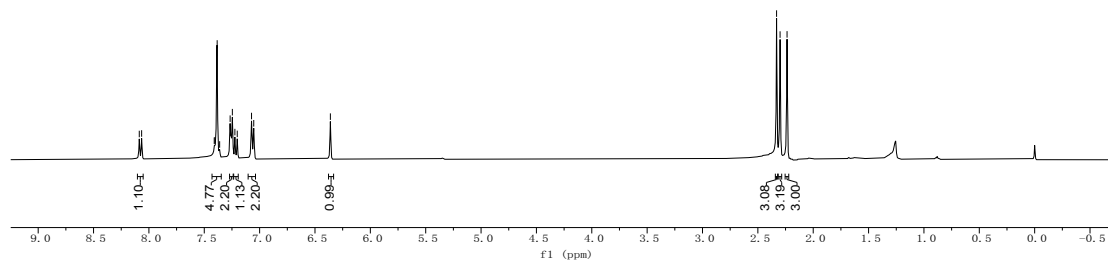

<sup>13</sup>C NMR (101 MHz, CDCl<sub>3</sub>)

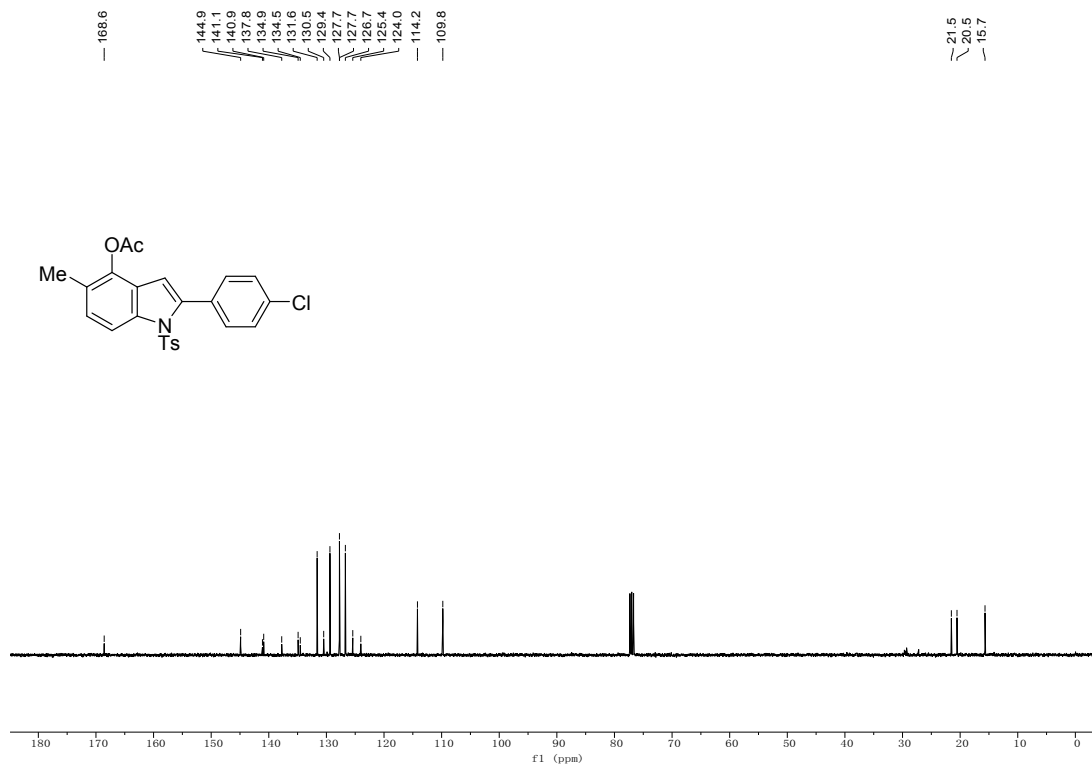

**5-methyl-2-(*o*-tolyl)-1-tosyl-1H-indol-4-yl acetate (9)**

<sup>1</sup>H NMR (400 MHz, CDCl<sub>3</sub>)

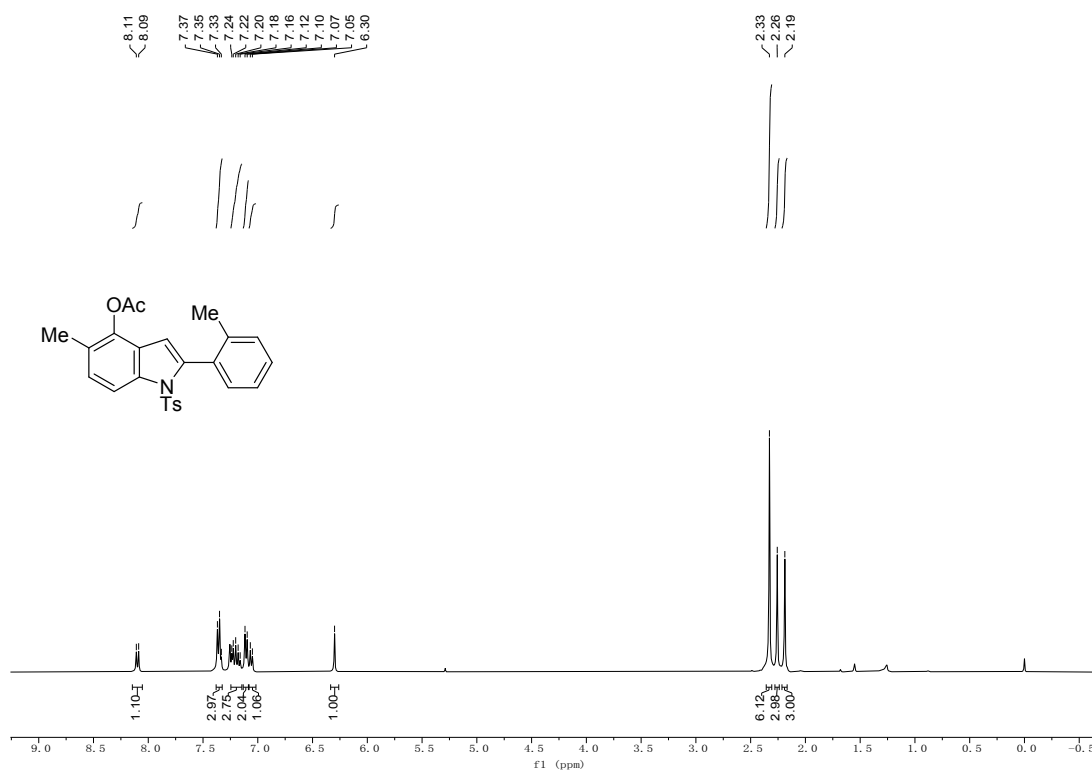

<sup>13</sup>C NMR (101 MHz, CDCl<sub>3</sub>)

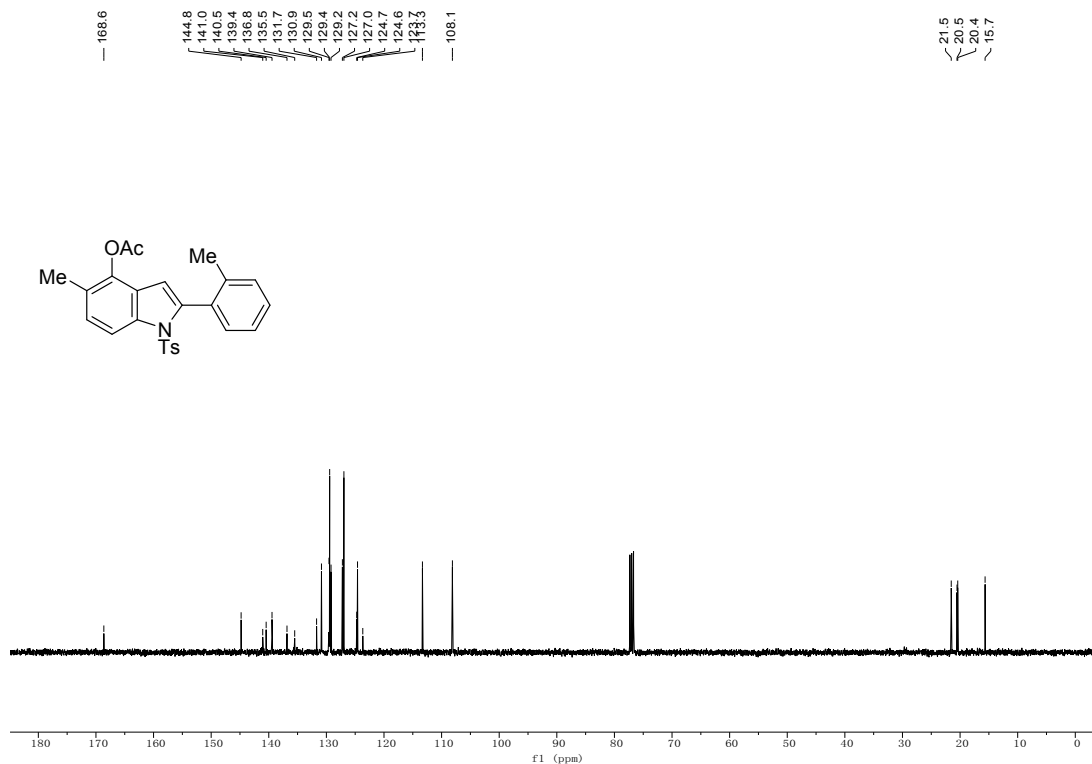

**5-methyl-2-(*m*-tolyl)-1-tosyl-1H-indol-4-yl acetate (10)**

<sup>1</sup>H NMR (400 MHz, CDCl<sub>3</sub>)

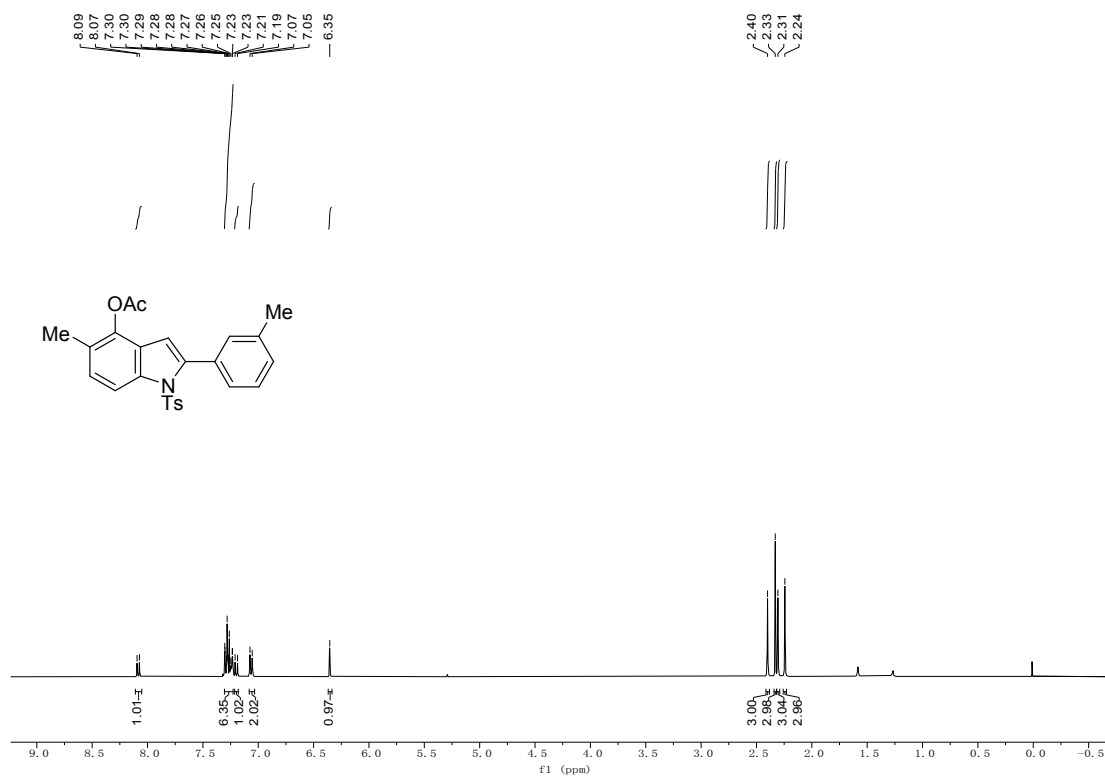

<sup>13</sup>C NMR (101 MHz, CDCl<sub>3</sub>)

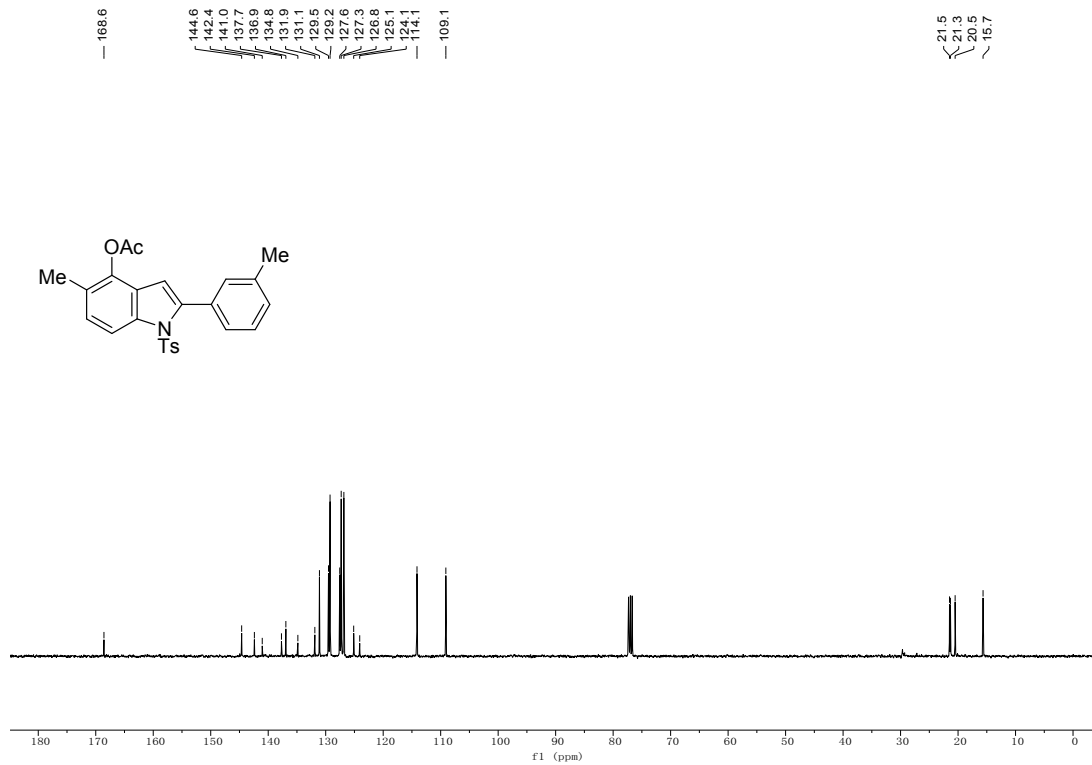

**5-methyl-2-(*p*-tolyl)-1-tosyl-1H-indol-4-yl acetate (11)**

<sup>1</sup>H NMR (400 MHz, CDCl<sub>3</sub>)

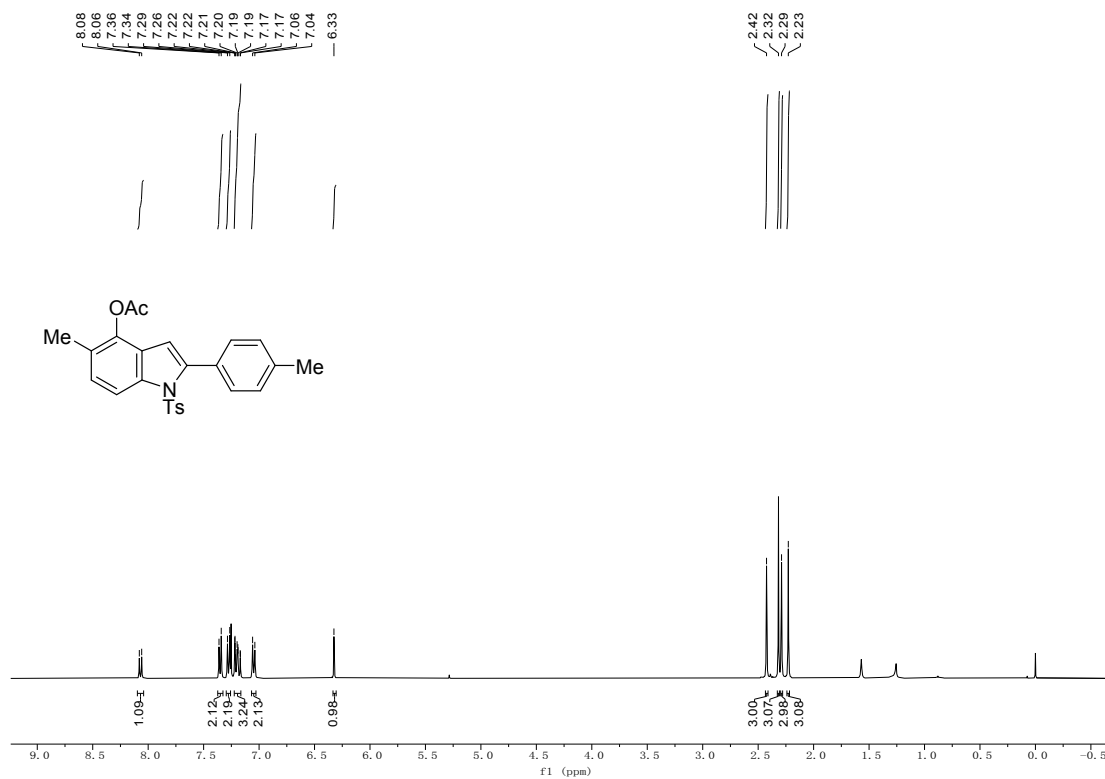

<sup>13</sup>C NMR (101 MHz, CDCl<sub>3</sub>)

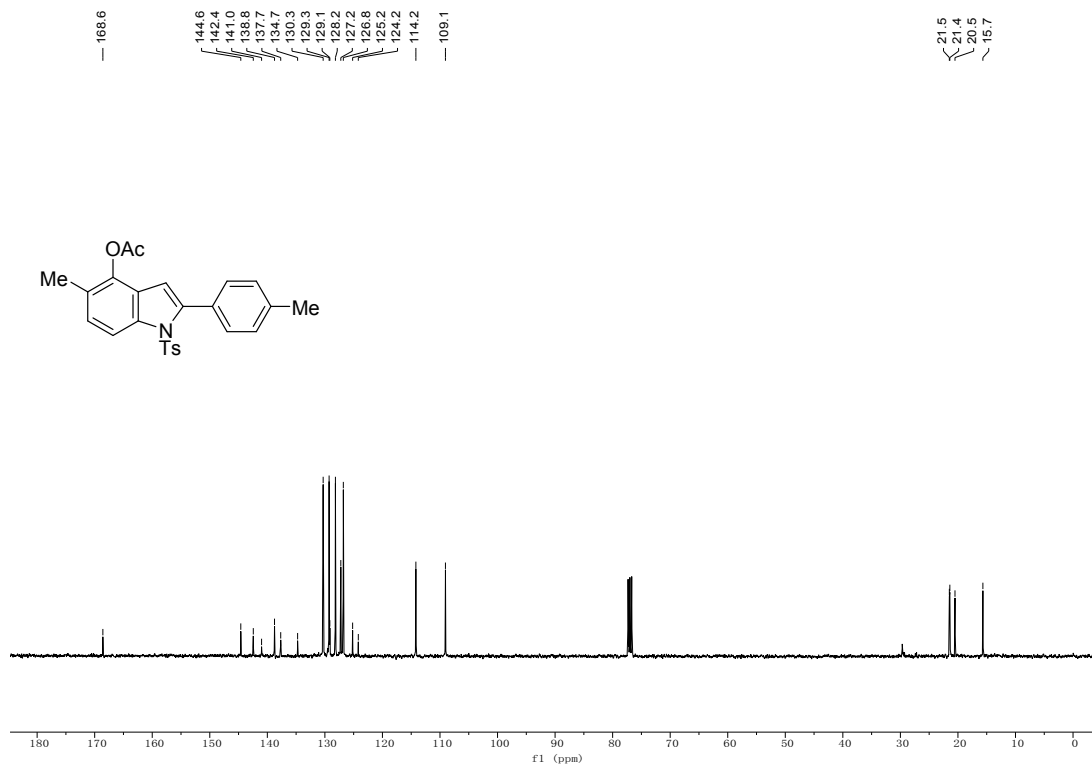

**2-(4-bromophenyl)-5-methyl-1-tosyl-1H-indol-4-yl acetate (12)**

$^1\text{H}$  NMR (400 MHz,  $\text{CDCl}_3$ )

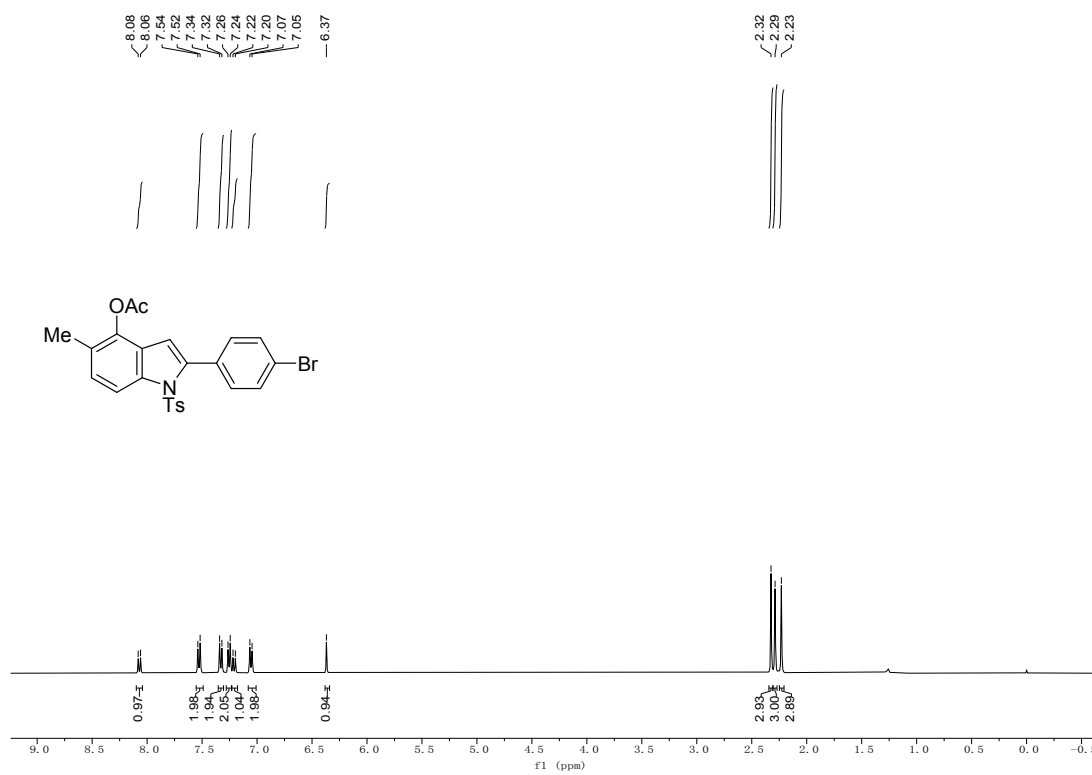

$^{13}\text{C}$  NMR (101 MHz,  $\text{CDCl}_3$ )

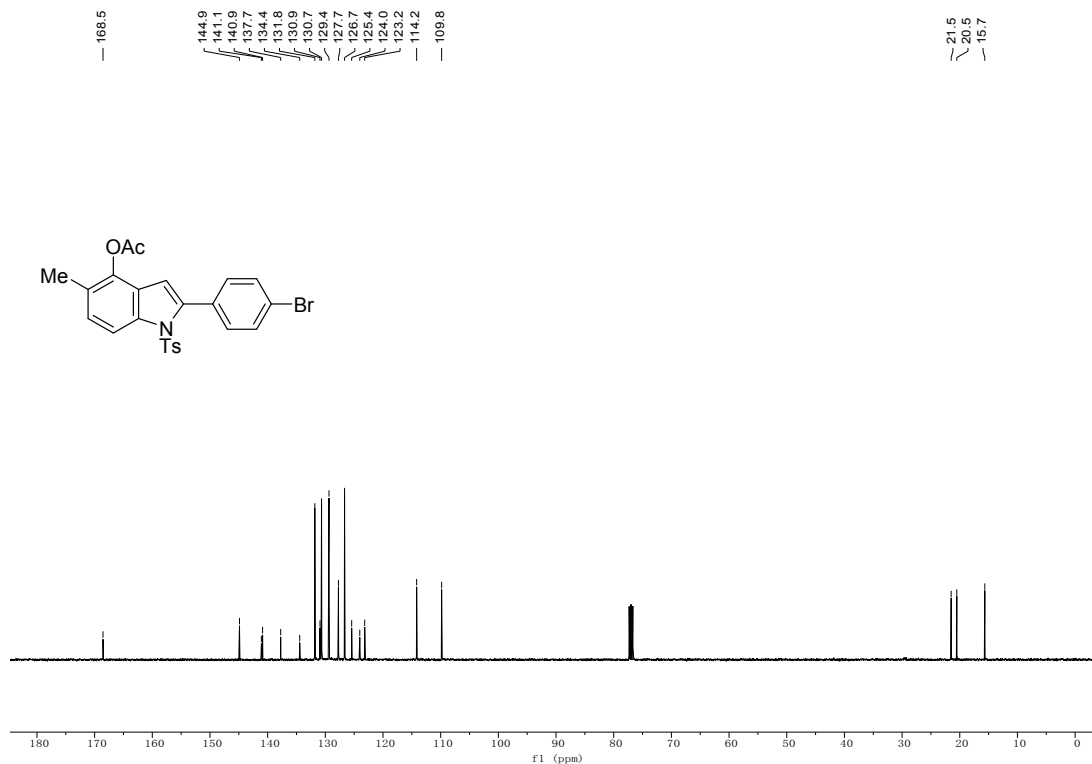

**2-(4-fluorophenyl)-5-methyl-1-tosyl-1H-indol-4-yl acetate (13)**

<sup>1</sup>H NMR (400 MHz, CDCl<sub>3</sub>)

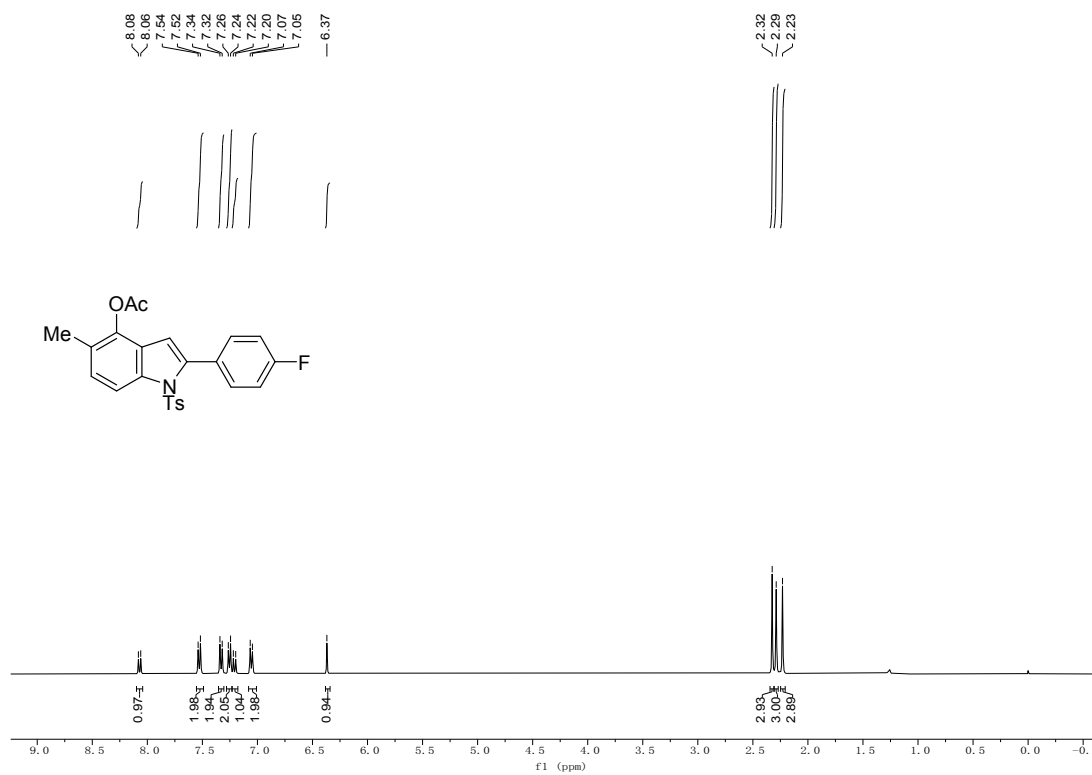

<sup>13</sup>C NMR (101 MHz, CDCl<sub>3</sub>)



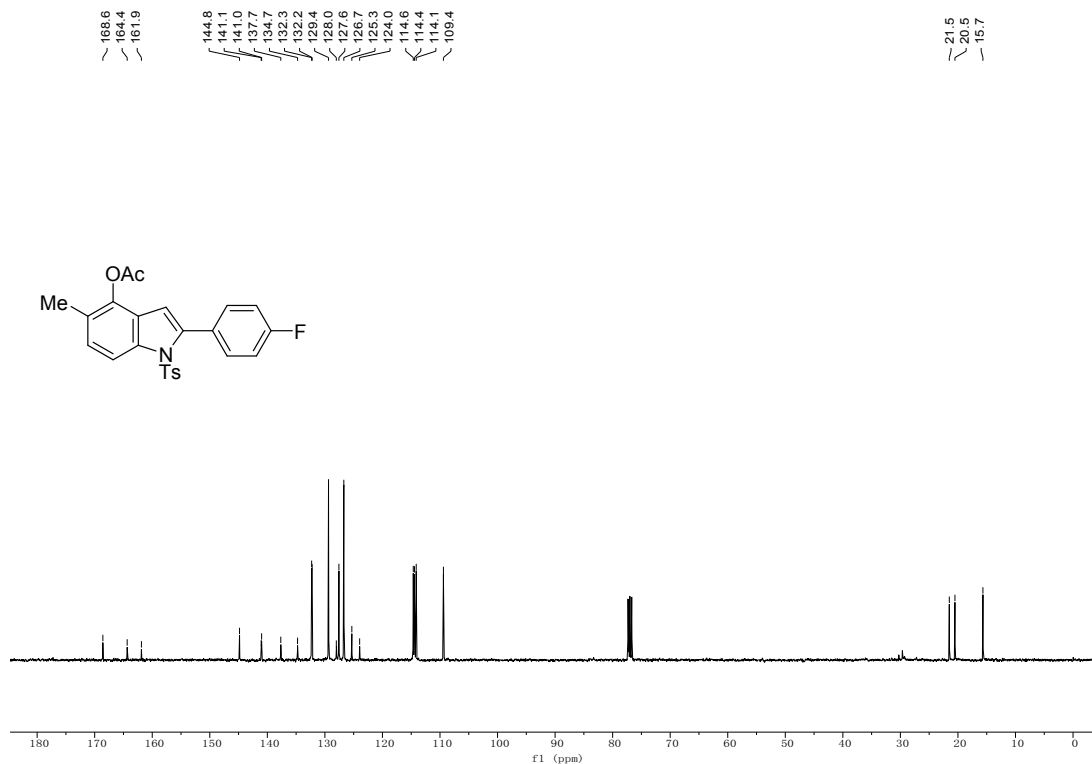

**5-methyl-2-(4-nitrophenyl)-1-tosyl-1H-indol-4-yl acetate (14)**

<sup>1</sup>H NMR (400 MHz, CDCl<sub>3</sub>)

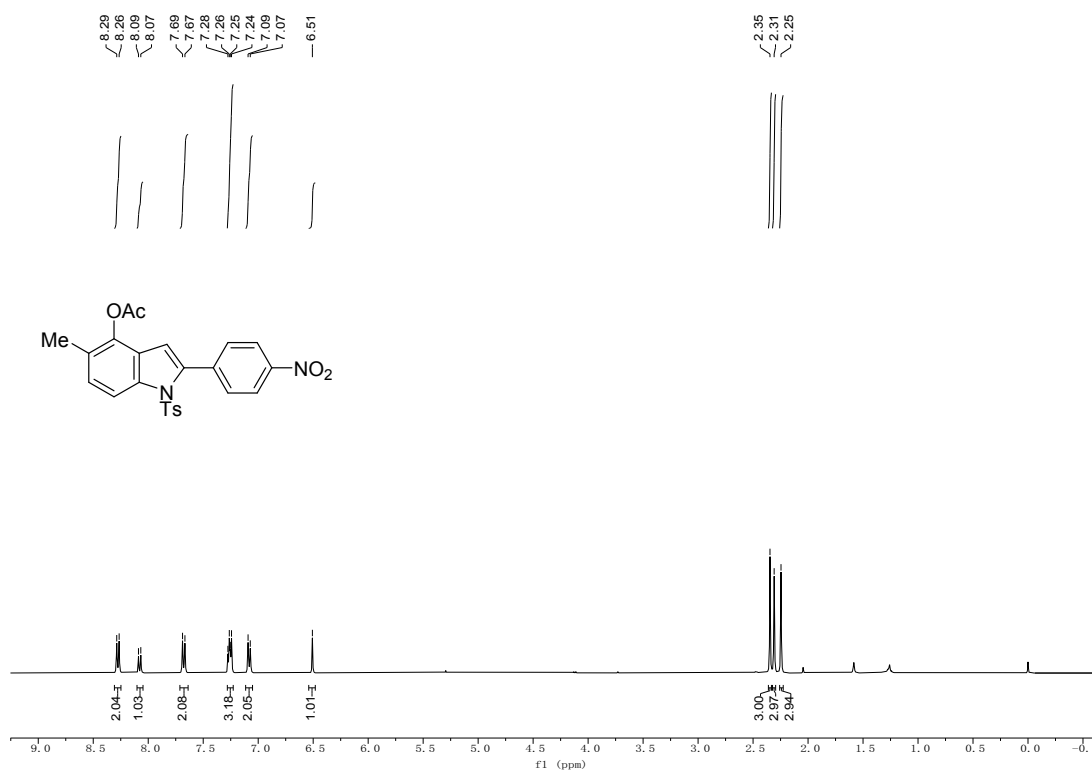

<sup>13</sup>C NMR (101 MHz, CDCl<sub>3</sub>)

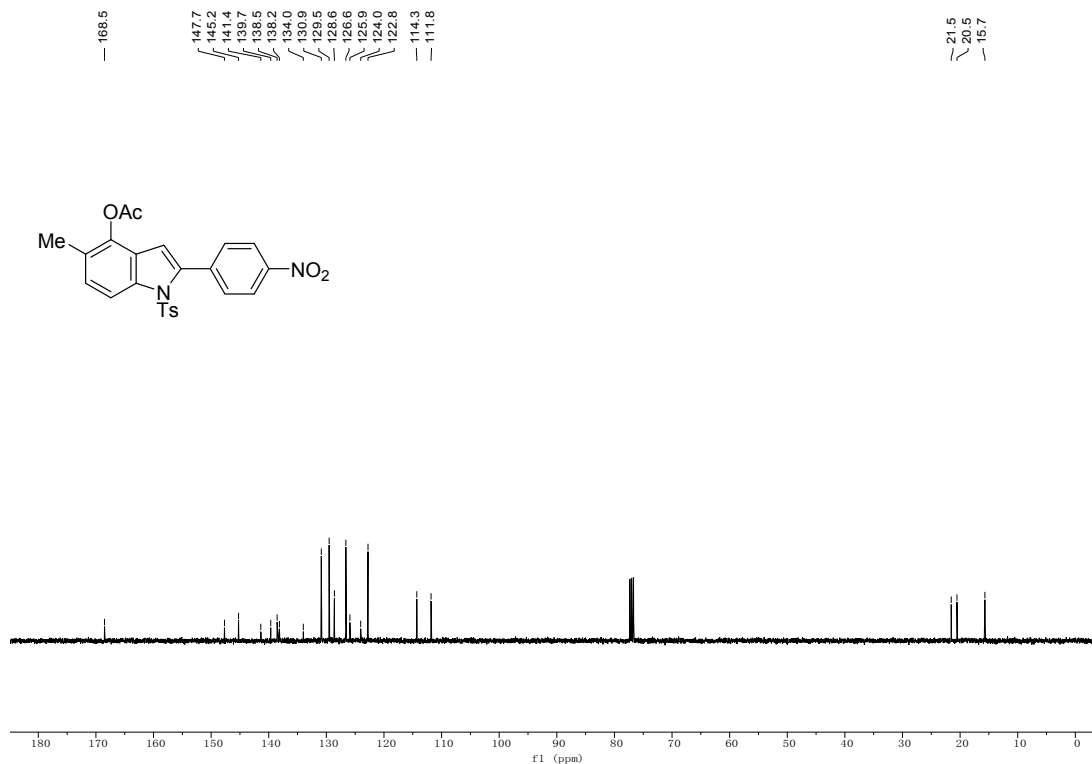

**Methyl 4-(4-acetoxy-5-methyl-1-tosyl-1H-indol-2-yl)benzoate (15)**

<sup>1</sup>H NMR (400 MHz, CDCl<sub>3</sub>)

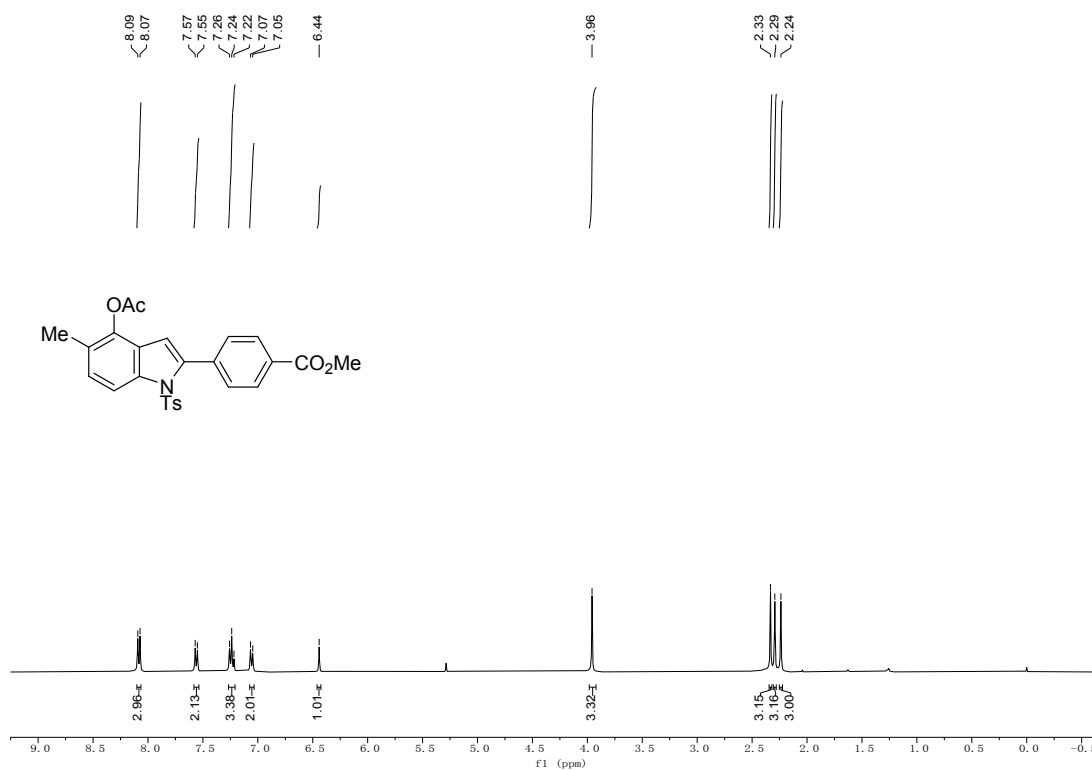

<sup>13</sup>C NMR (101 MHz, CDCl<sub>3</sub>)

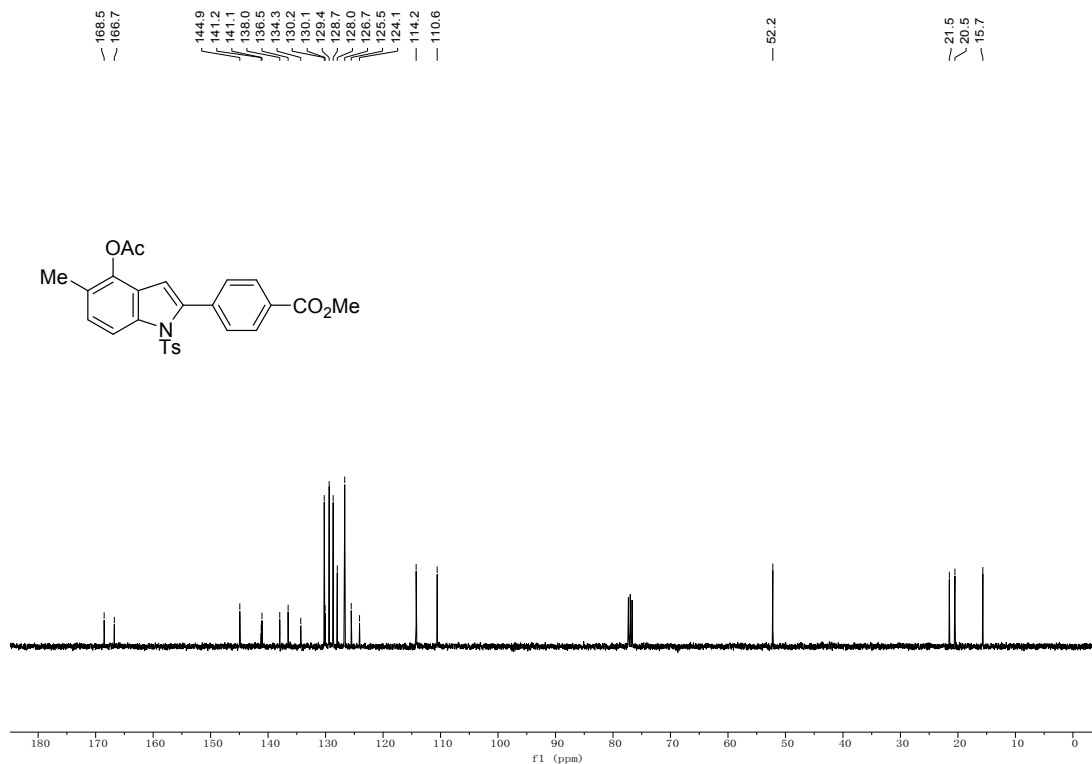

**2-(4-methoxyphenyl)-5-methyl-1-tosyl-1H-indol-4-yl acetate (16)**

<sup>1</sup>H NMR (400 MHz, CDCl<sub>3</sub>)

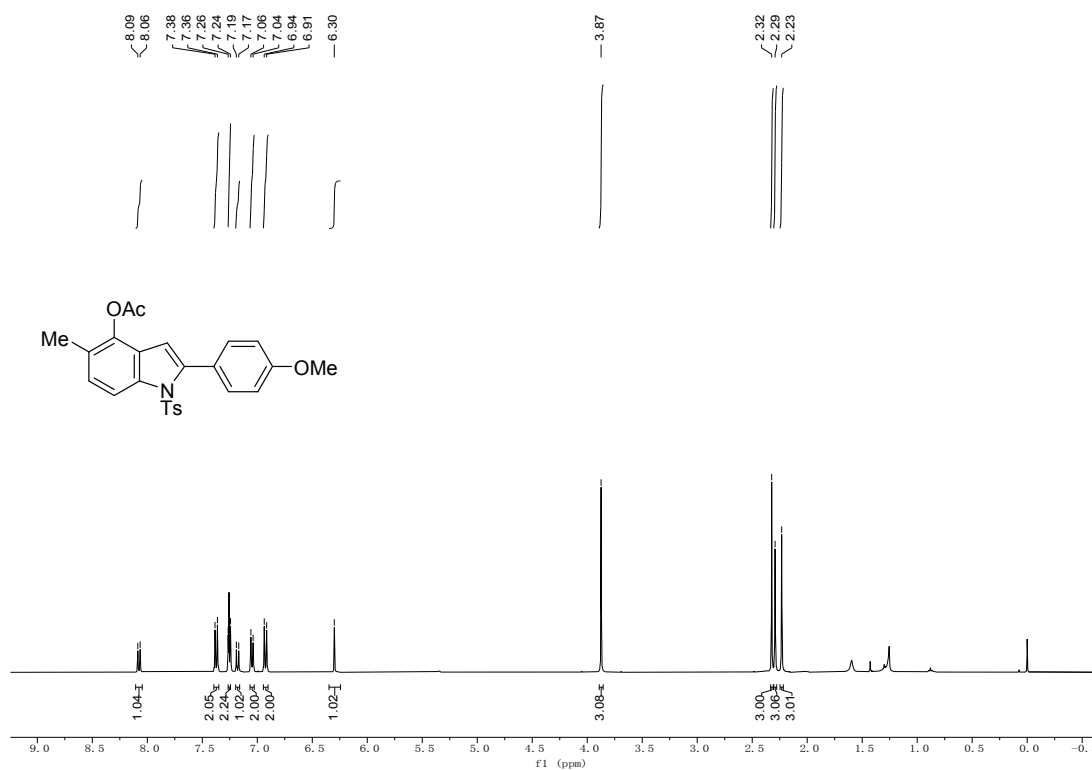

<sup>13</sup>C NMR (101 MHz, CDCl<sub>3</sub>)

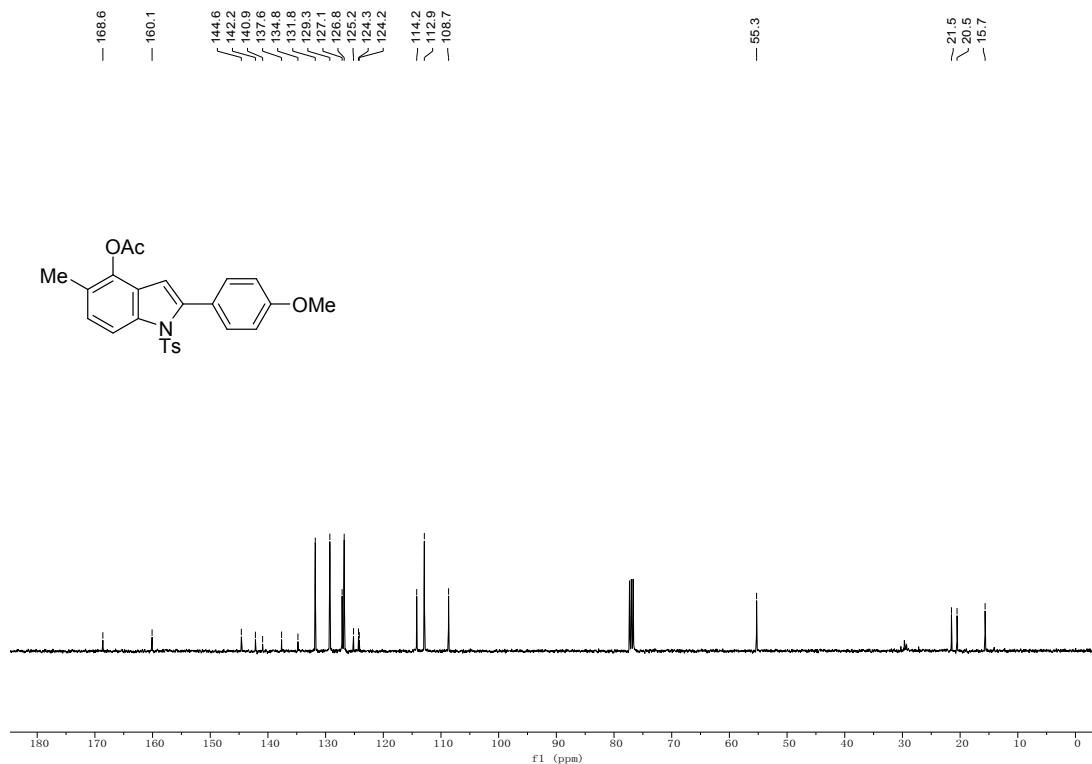

### 5-methyl-2-(thiophen-2-yl)-1-tosyl-1H-indol-4-yl acetate (17)

<sup>1</sup>H NMR (400 MHz, CDCl<sub>3</sub>)

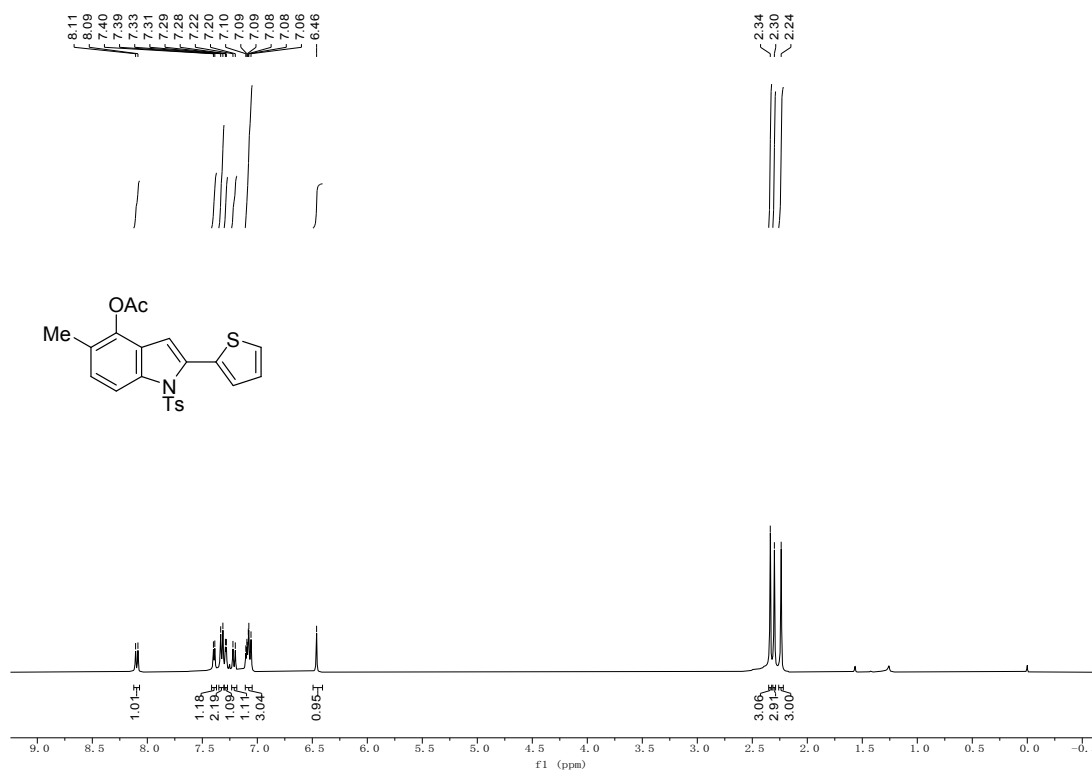

<sup>13</sup>C NMR (101 MHz, CDCl<sub>3</sub>)

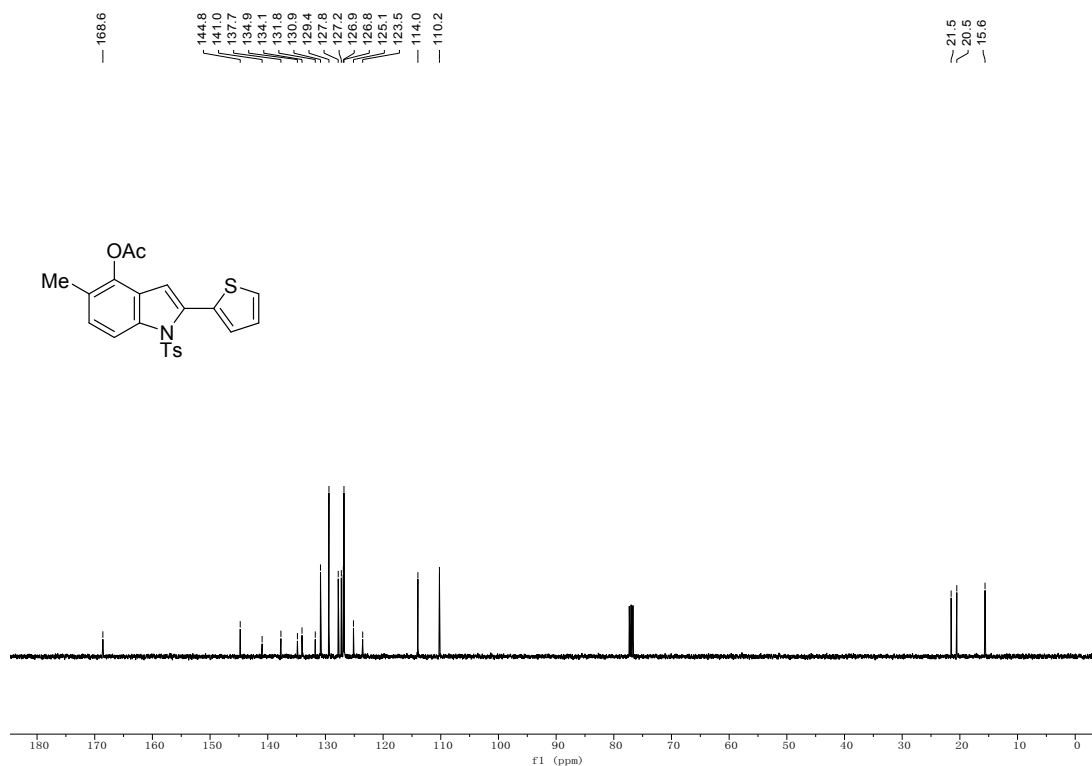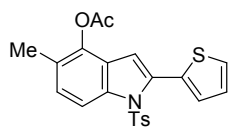

**2-butyl-5-methyl-1-tosyl-1H-indol-4-yl acetate (18)**

<sup>1</sup>H NMR (400 MHz, CDCl<sub>3</sub>)

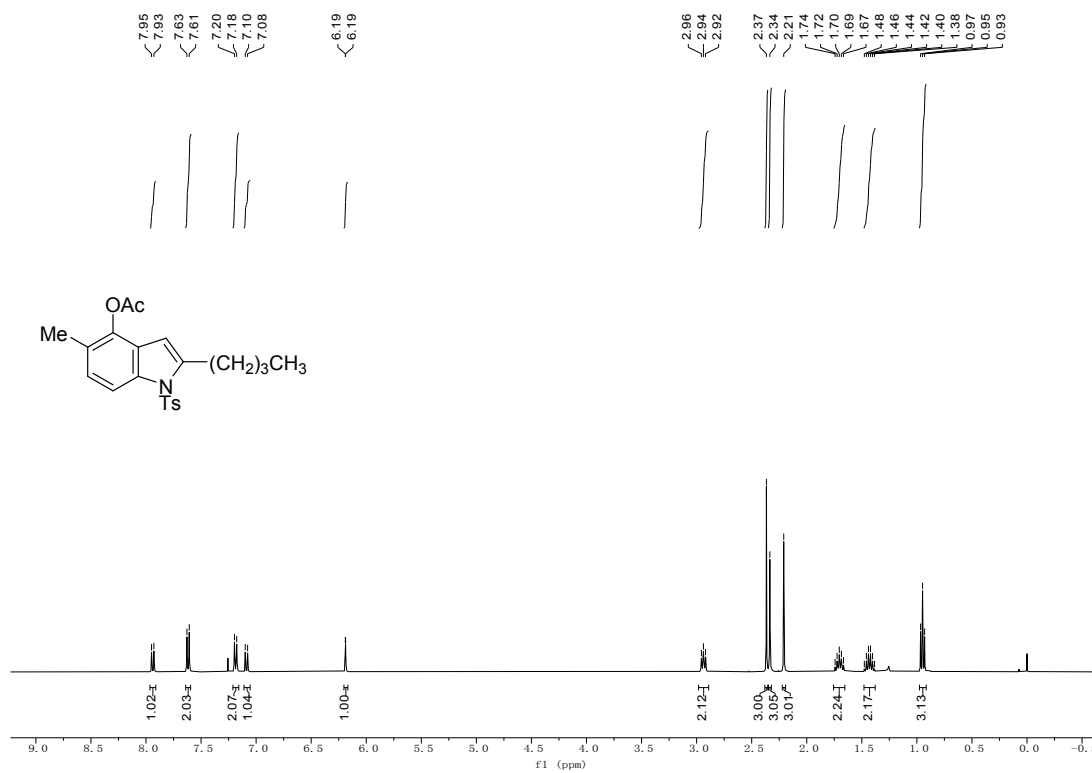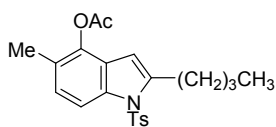

<sup>13</sup>C NMR (101 MHz, CDCl<sub>3</sub>)

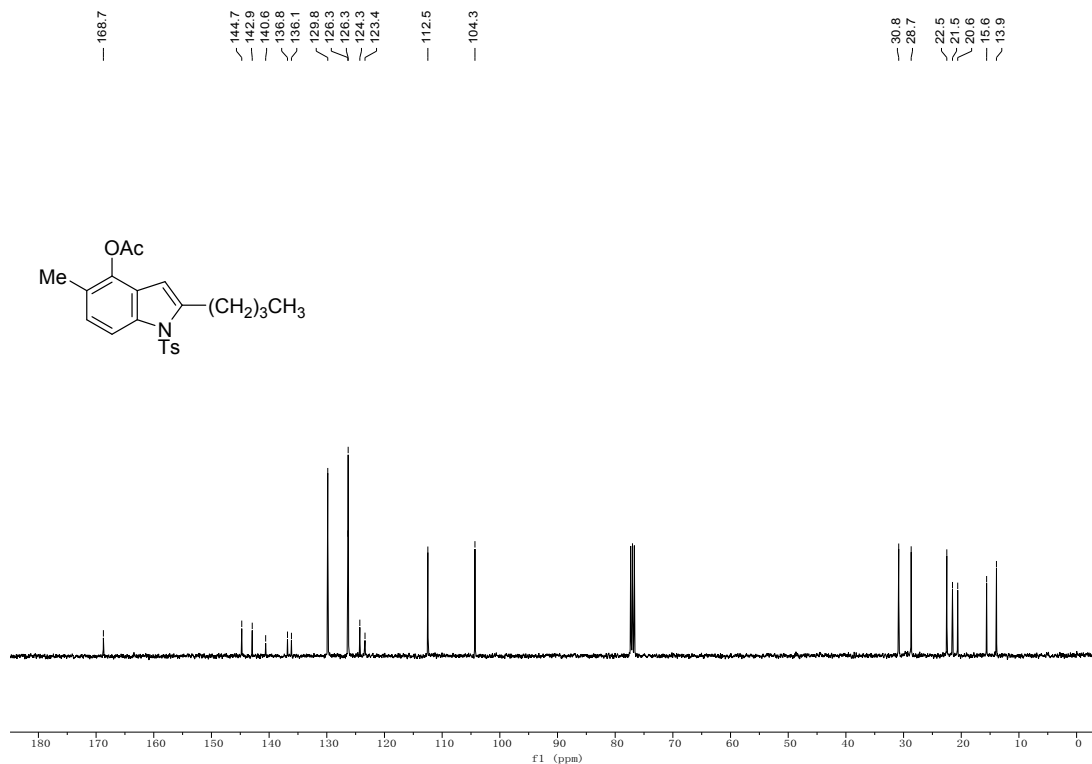

**5-methyl-2-(4-pentylphenyl)-1-tosyl-1H-indol-4-yl acetate (19)**

<sup>1</sup>H NMR (400 MHz, CDCl<sub>3</sub>)

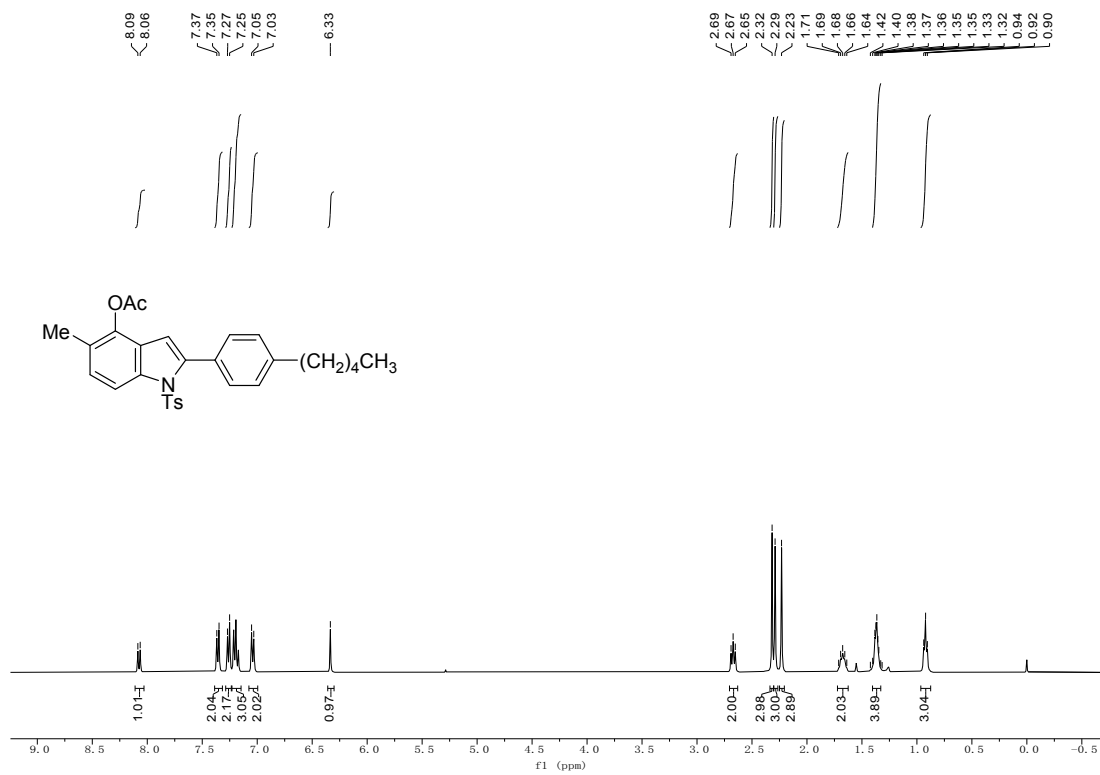

<sup>13</sup>C NMR (101 MHz, CDCl<sub>3</sub>)

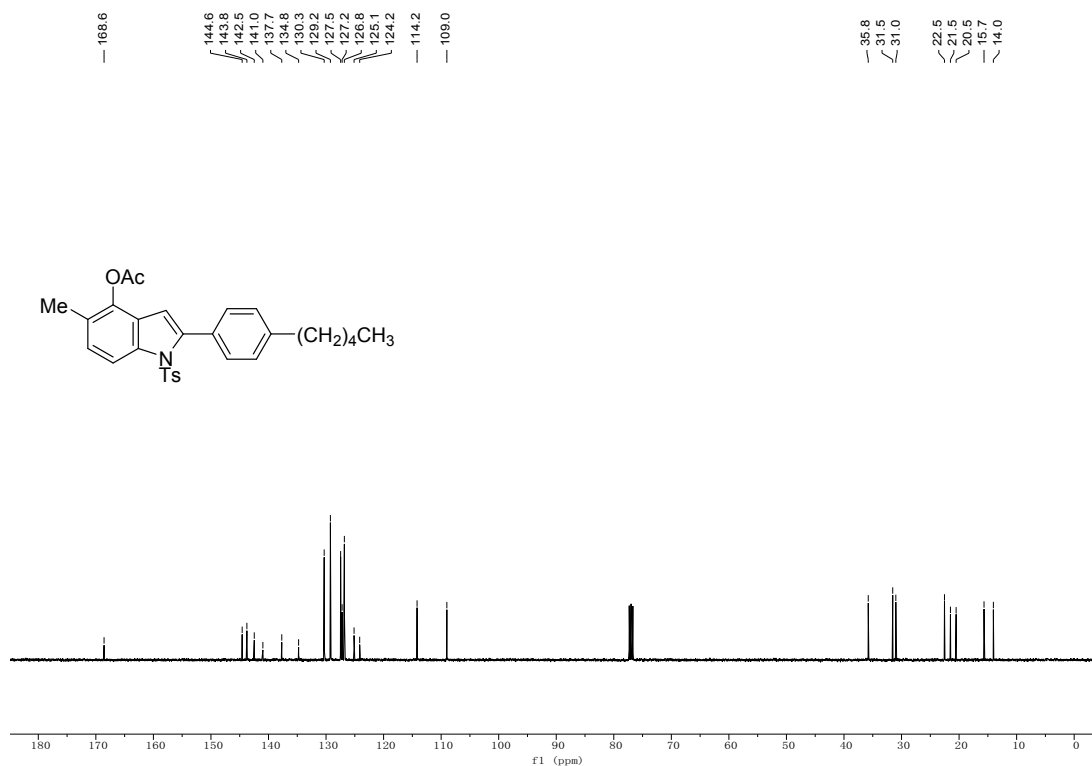

**2-(*tert*-butyl)-5-methyl-1-tosyl-1H-indol-4-yl acetate (20)**

<sup>1</sup>H NMR (400 MHz, CDCl<sub>3</sub>)

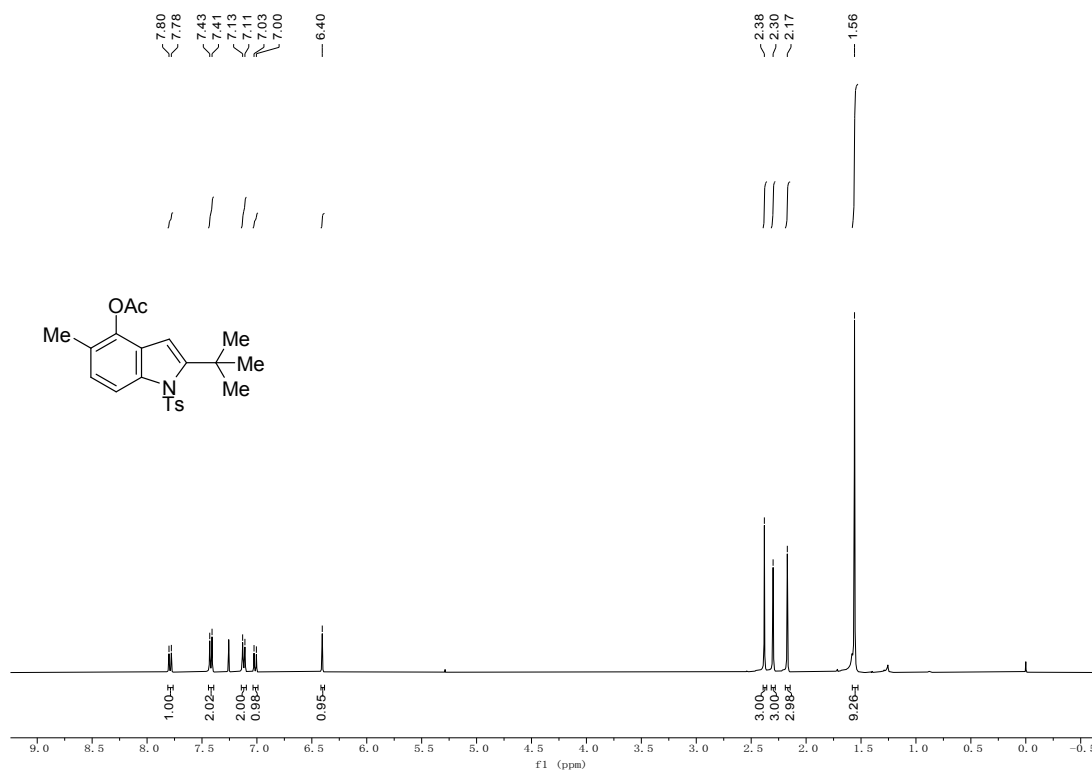

<sup>13</sup>C NMR (101 MHz, CDCl<sub>3</sub>)

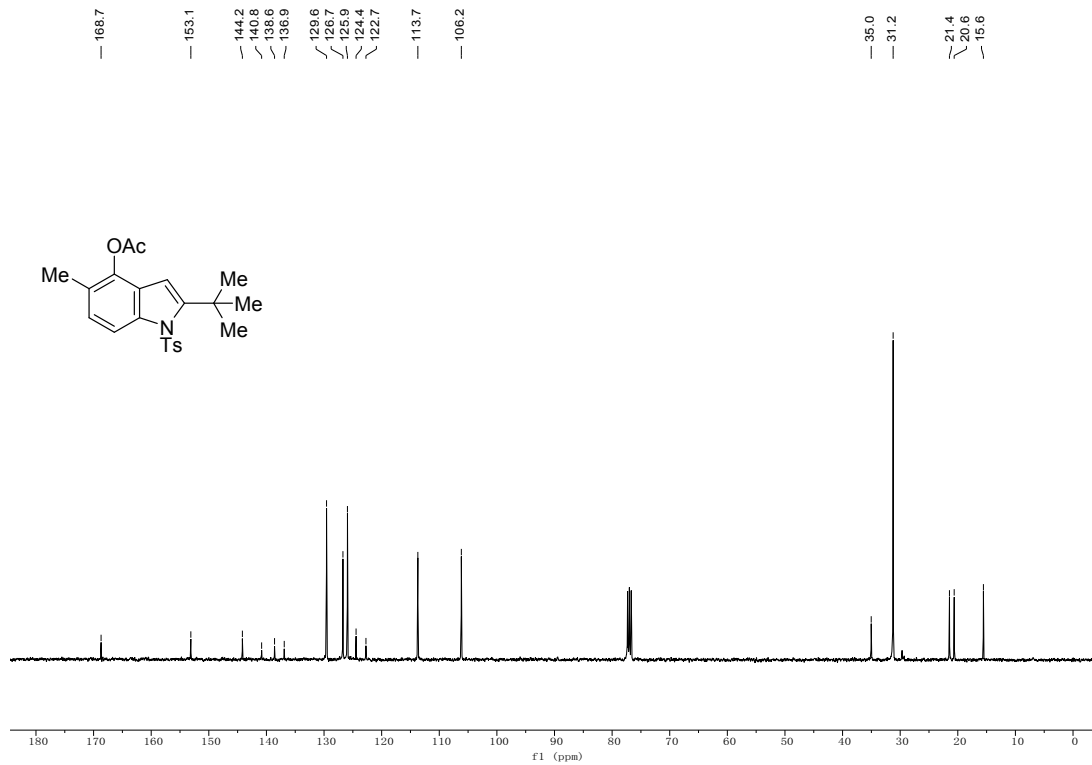

**2-cyclopropyl-5-methyl-1-tosyl-1H-indol-4-yl acetate (21)**

<sup>1</sup>H NMR (400 MHz, CDCl<sub>3</sub>)

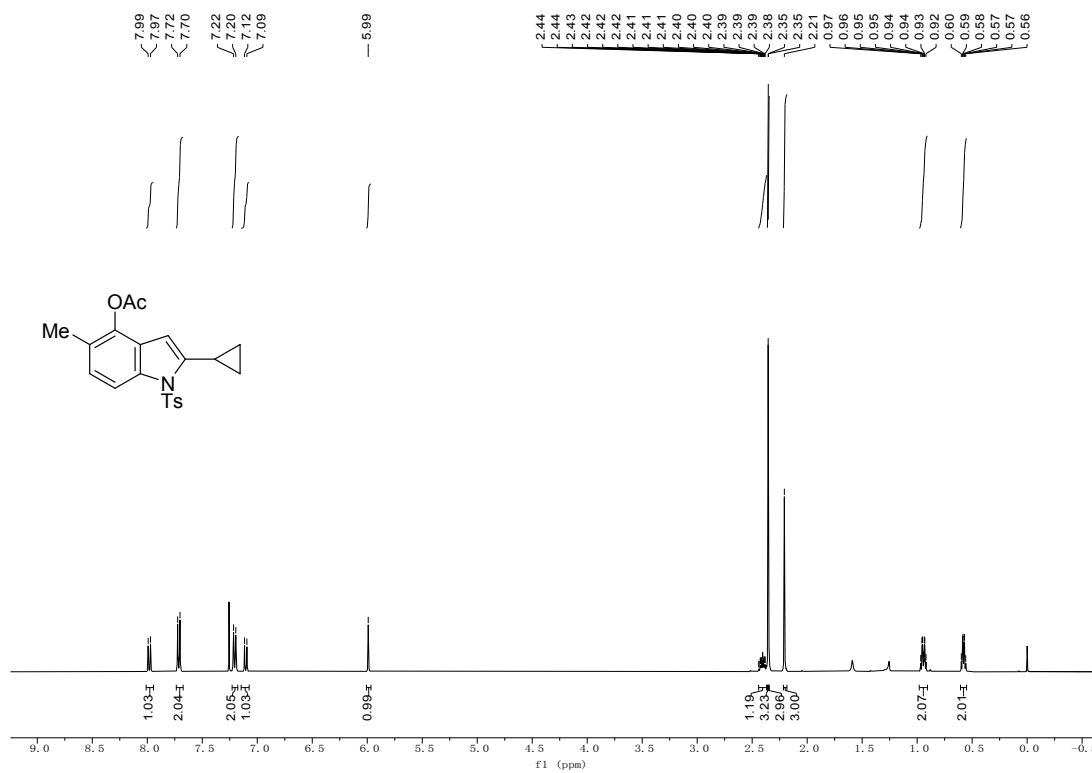

<sup>13</sup>C NMR (101 MHz, CDCl<sub>3</sub>)



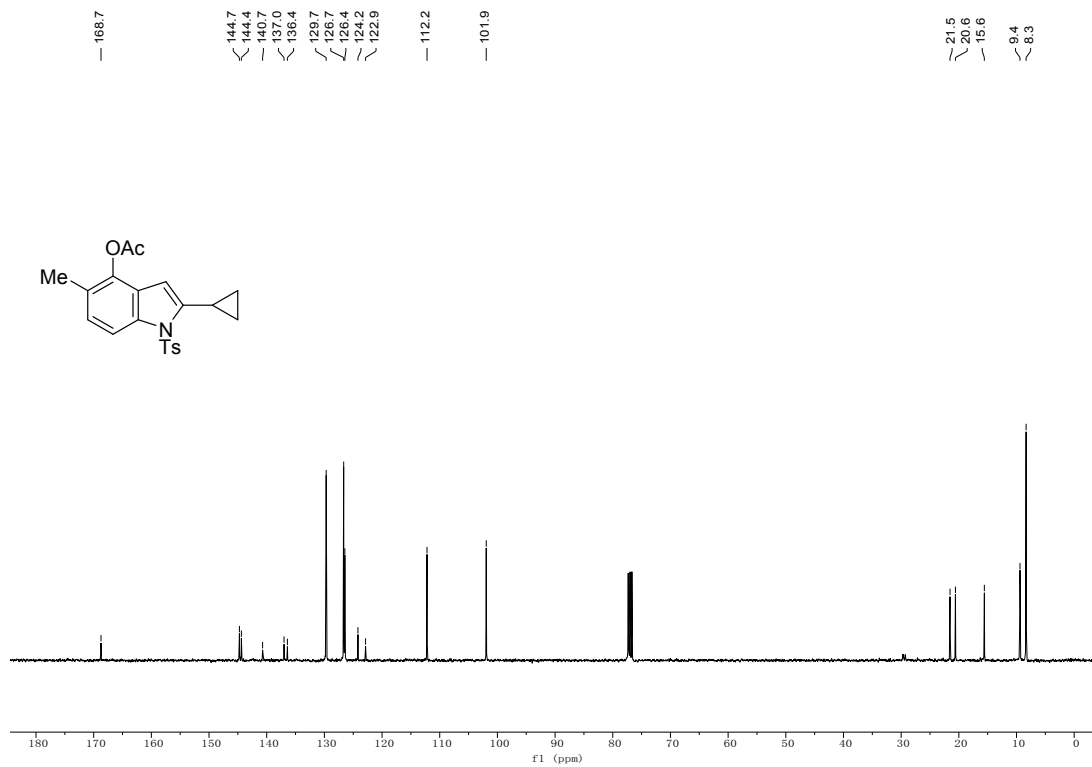

**5-methyl-1-tosyl-1H-indol-4-yl acetate (22)**

<sup>1</sup>H NMR (400 MHz, CDCl<sub>3</sub>)

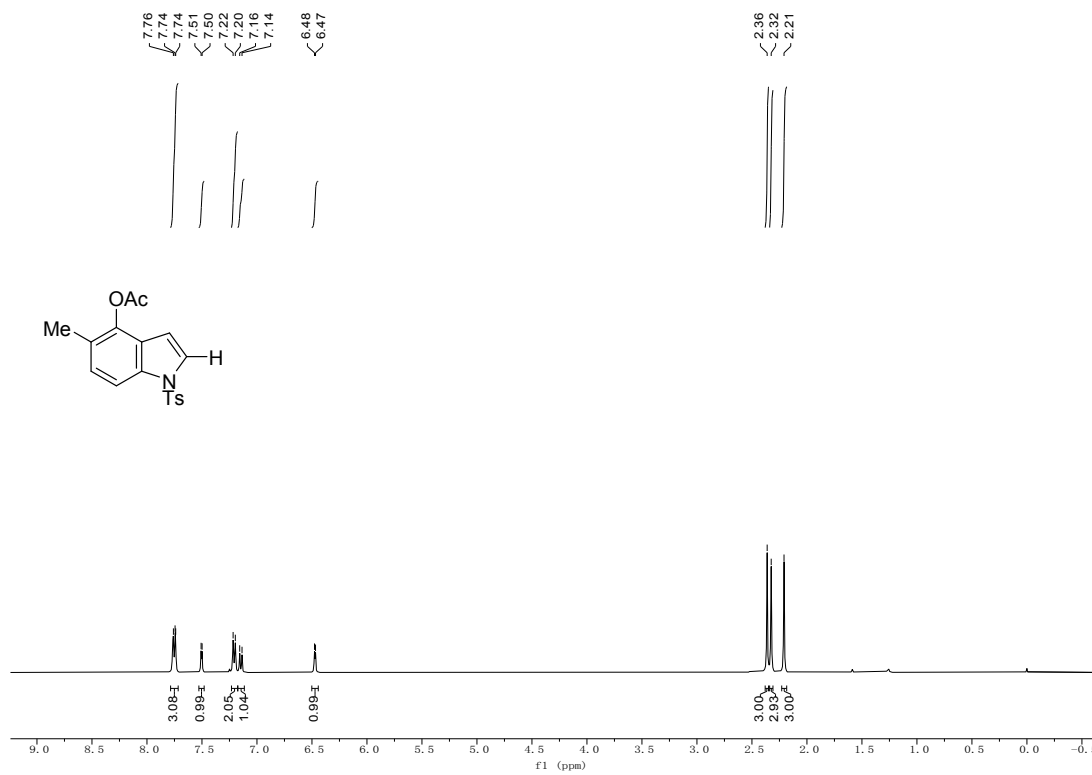

<sup>13</sup>C NMR (101 MHz, CDCl<sub>3</sub>)

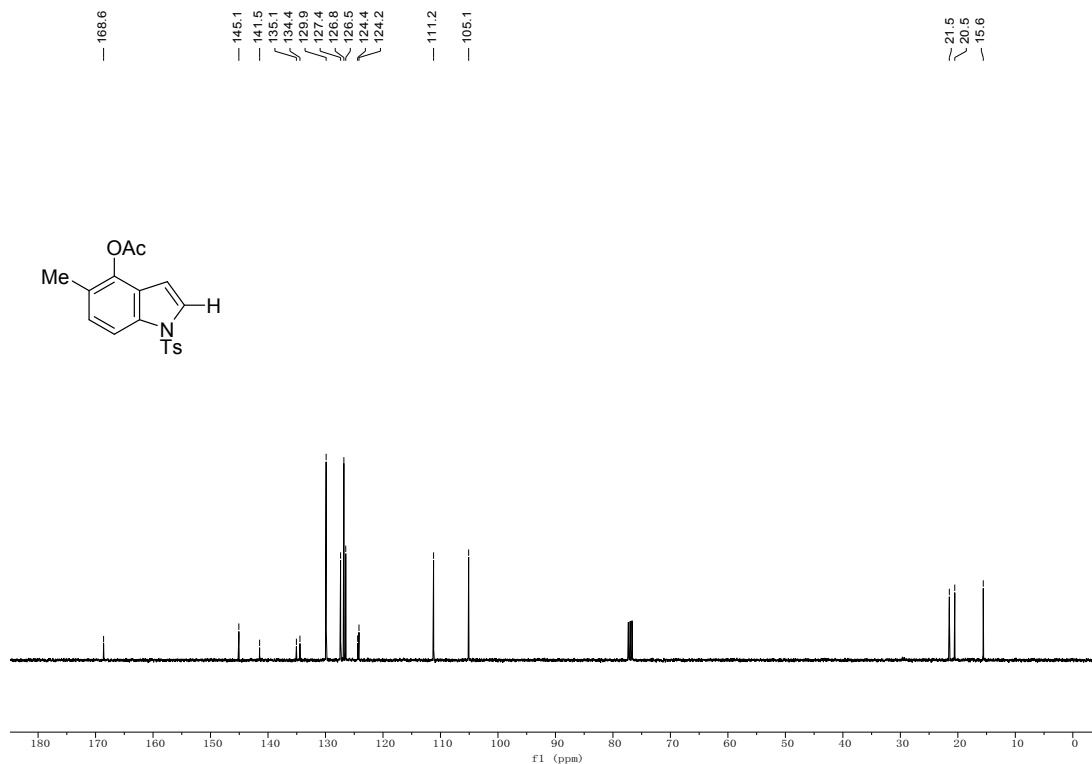

### 5-butyl-2-phenyl-1-tosyl-1H-indol-4-yl acetate (23)

<sup>1</sup>H NMR (400 MHz, CDCl<sub>3</sub>)

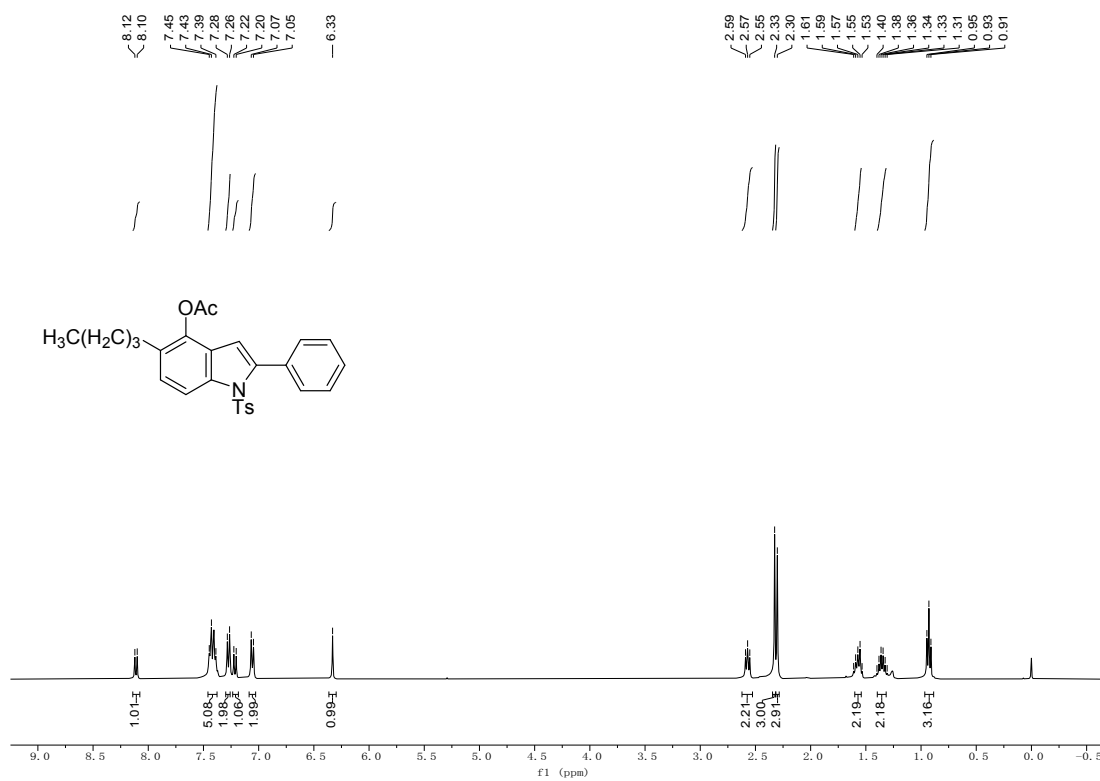

<sup>13</sup>C NMR (101 MHz, CDCl<sub>3</sub>)

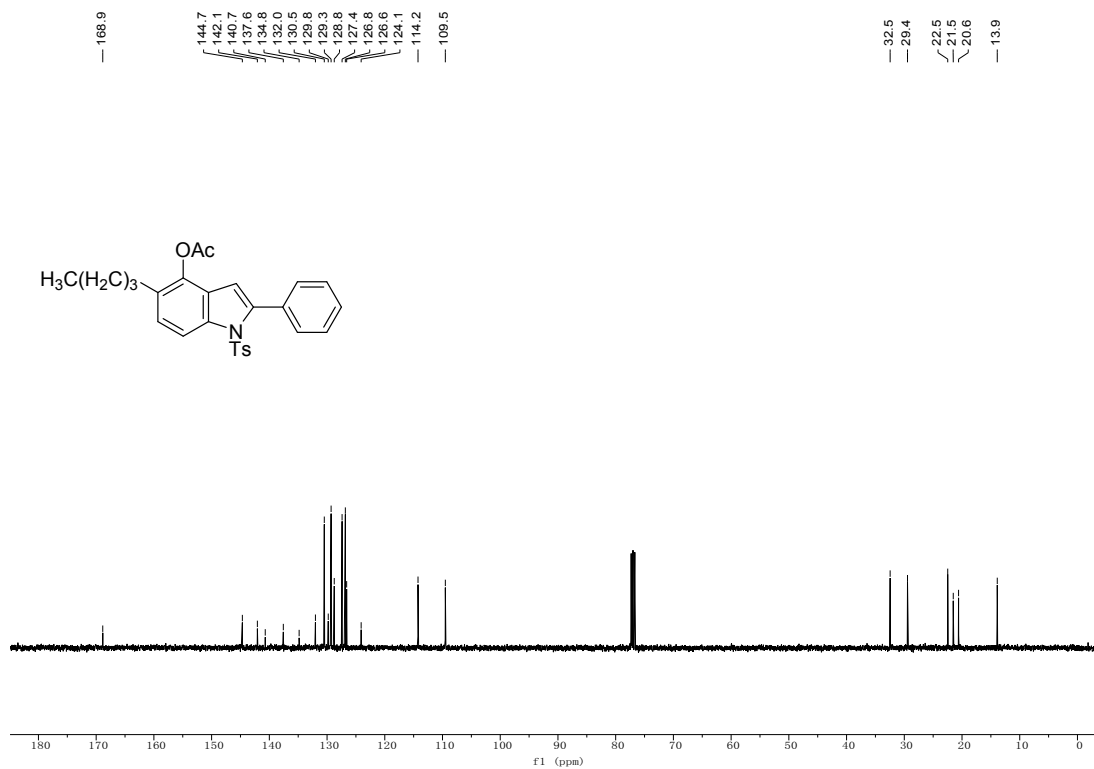

**5-dodecyl-2-phenyl-1-tosyl-1H-indol-4-yl acetate (24)**

<sup>1</sup>H NMR (400 MHz, CDCl<sub>3</sub>)

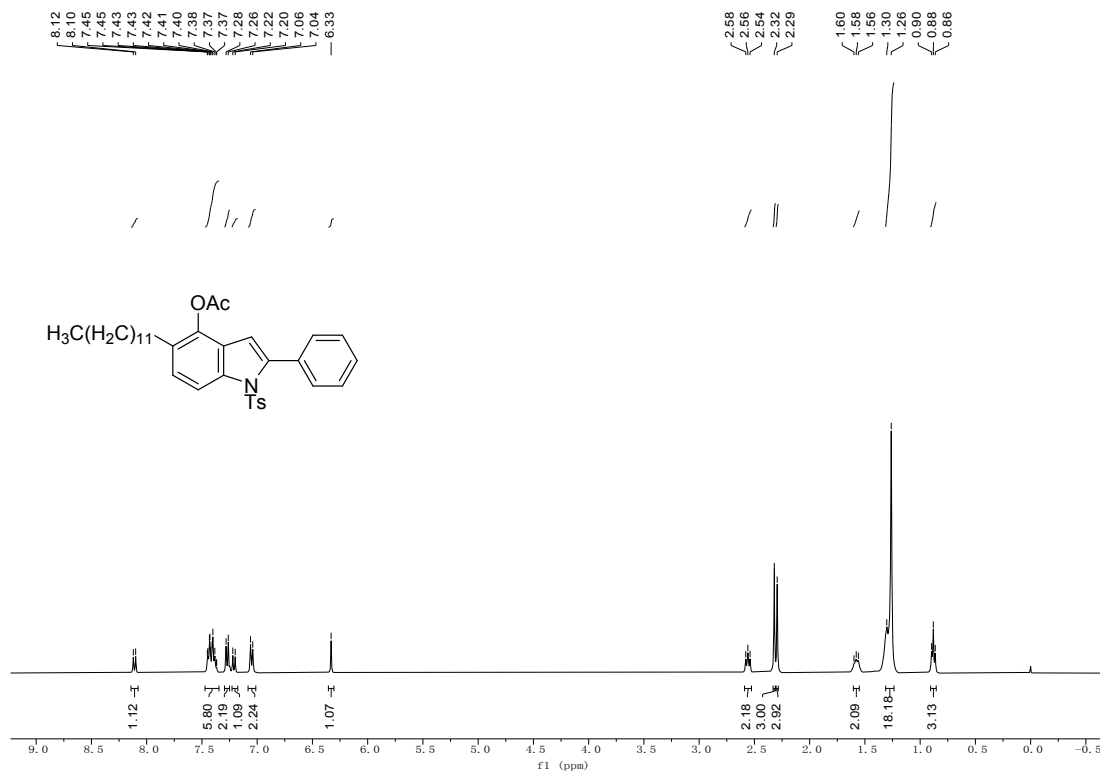

<sup>13</sup>C NMR (101 MHz, CDCl<sub>3</sub>)

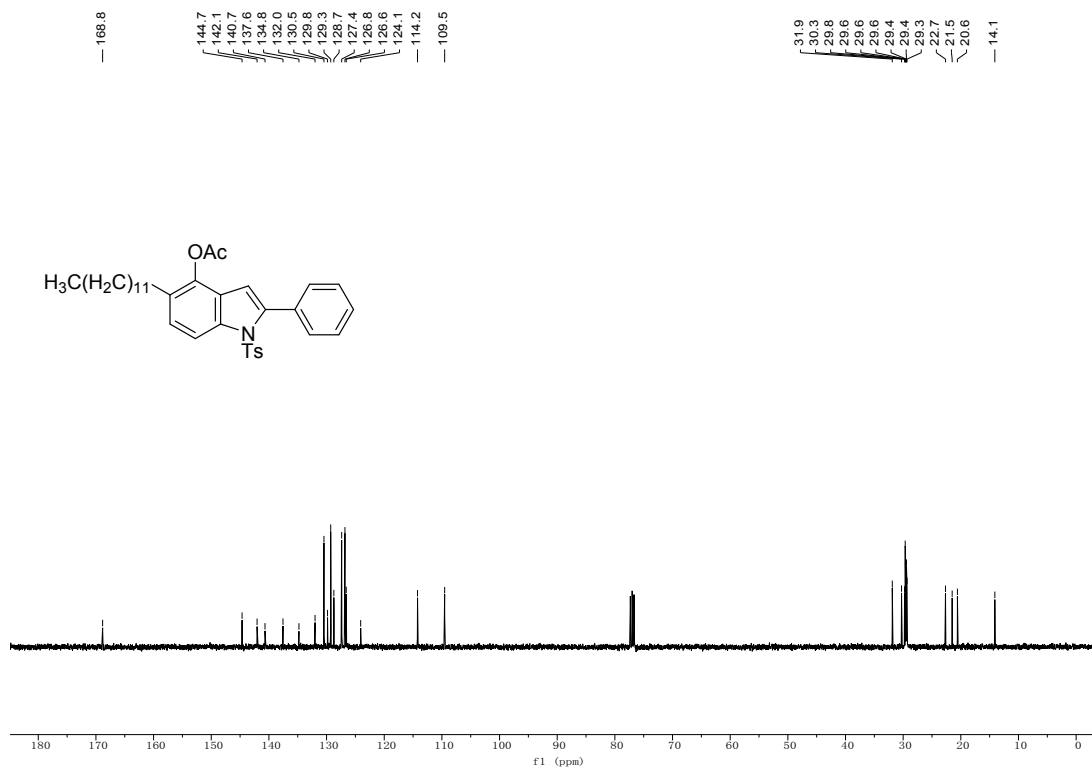

**5-isopropyl-2-phenyl-1H-indol-4-yl acetate (25)**

<sup>1</sup>H NMR (400 MHz, CDCl<sub>3</sub>)

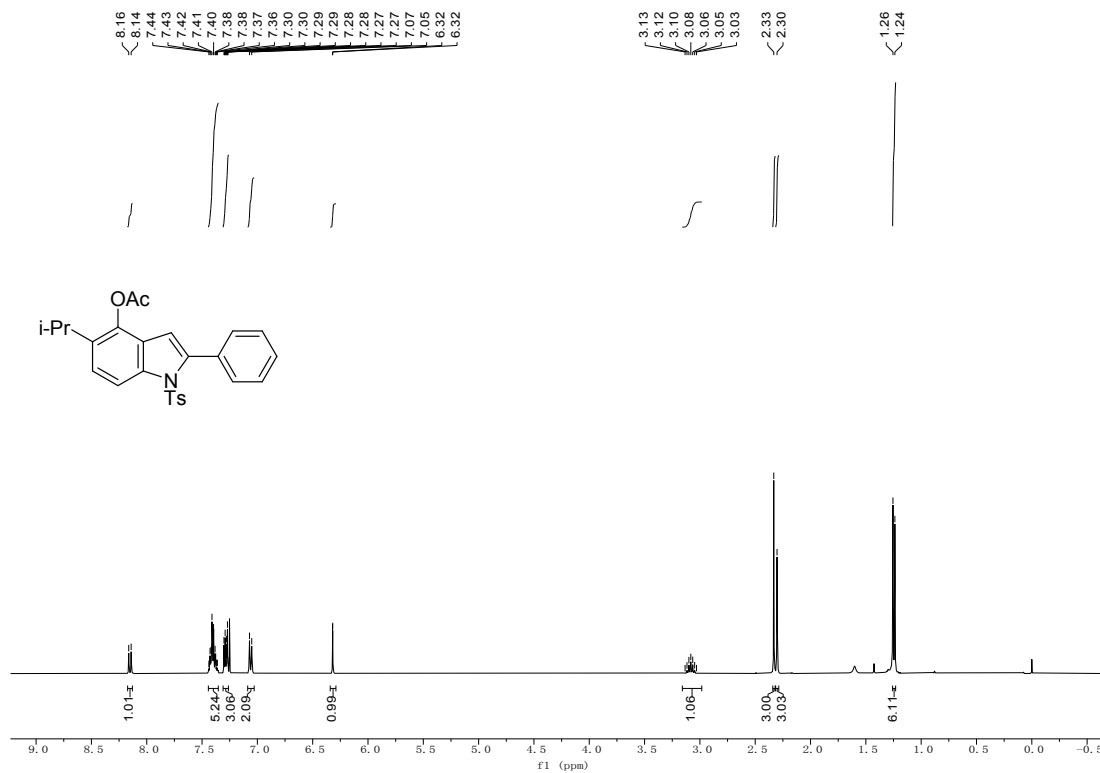

<sup>13</sup>C NMR (101 MHz, CDCl<sub>3</sub>)

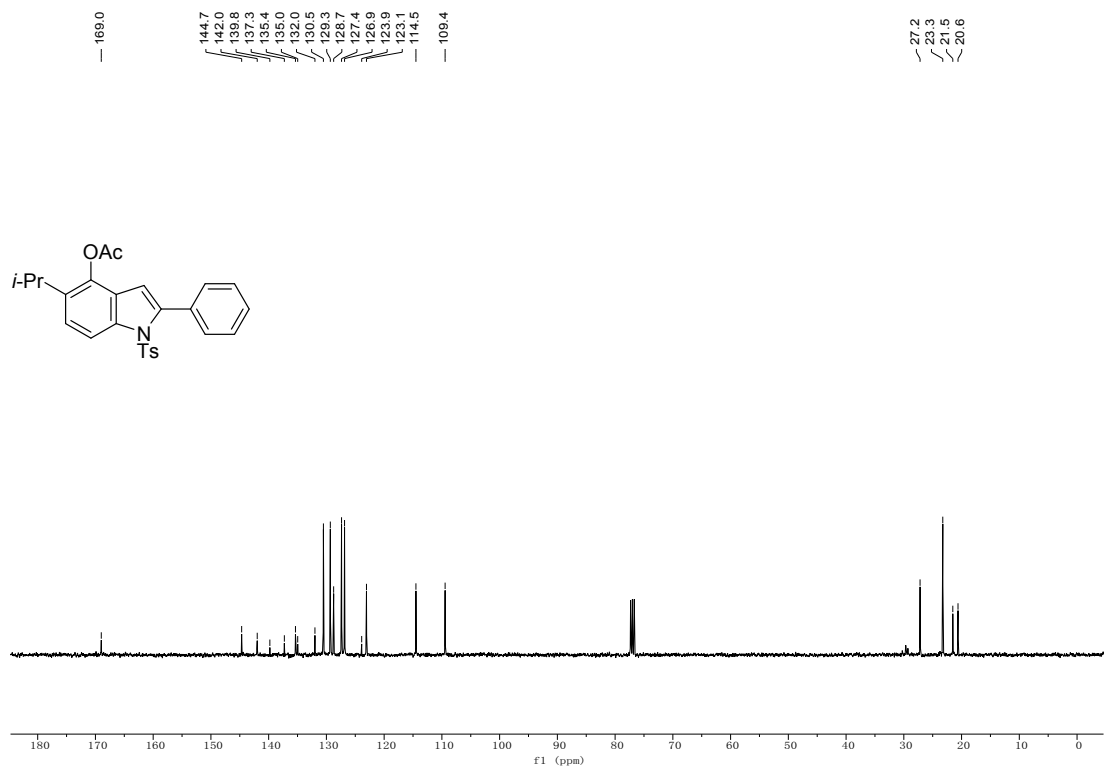

**5-cyclohexyl-2-phenyl-1-tosyl-1H-indol-4-yl acetate (26)**

<sup>1</sup>H NMR (400 MHz, CDCl<sub>3</sub>)

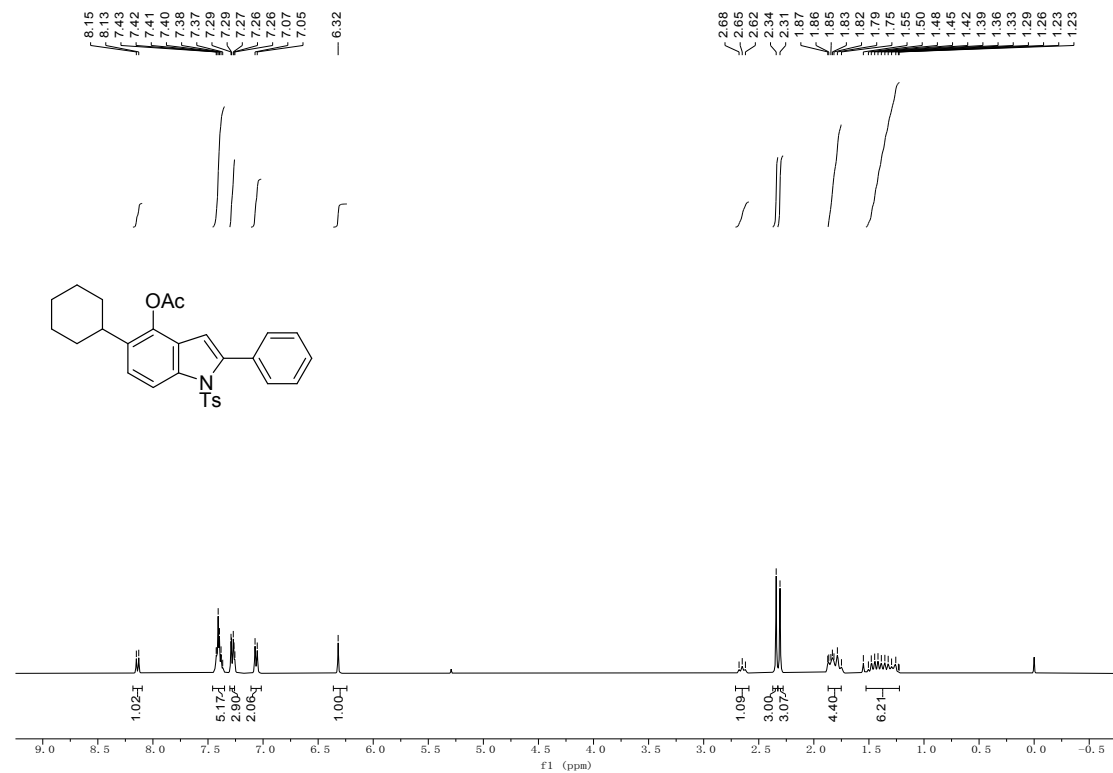

<sup>13</sup>C NMR (101 MHz, CDCl<sub>3</sub>)

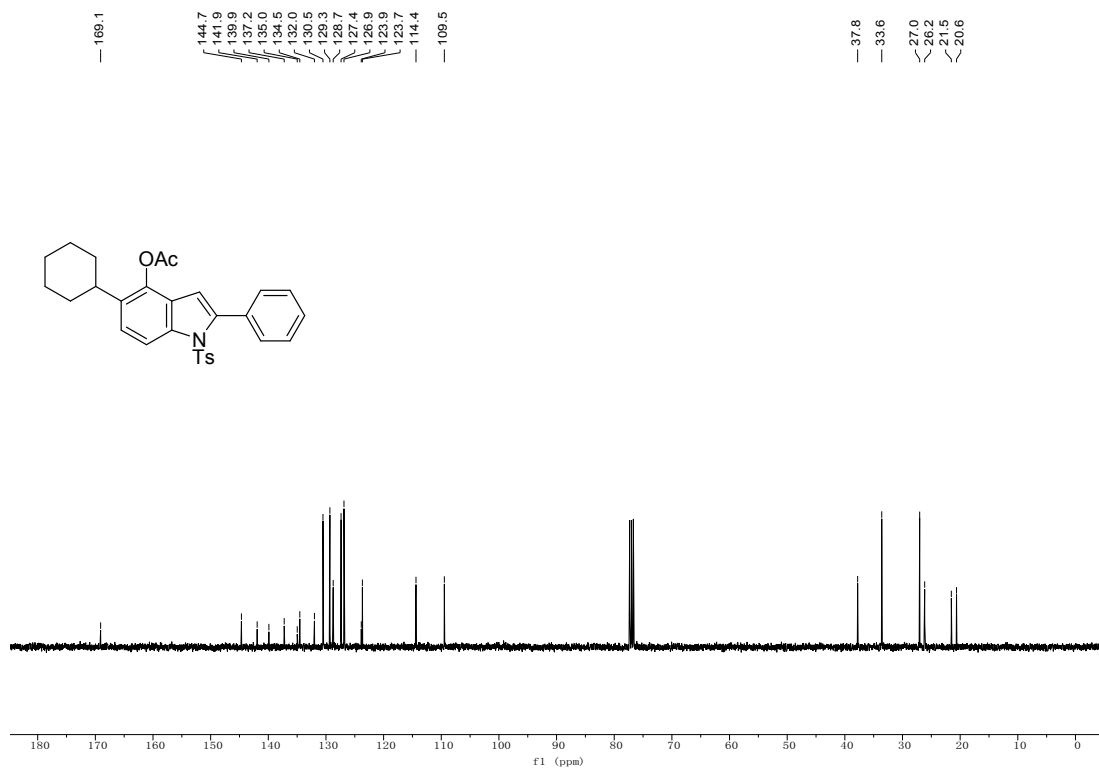

**5,6-dimethyl-2-phenyl-1-tosyl-1H-indol-4-yl acetate (27)**

<sup>1</sup>H NMR (400 MHz, CDCl<sub>3</sub>)

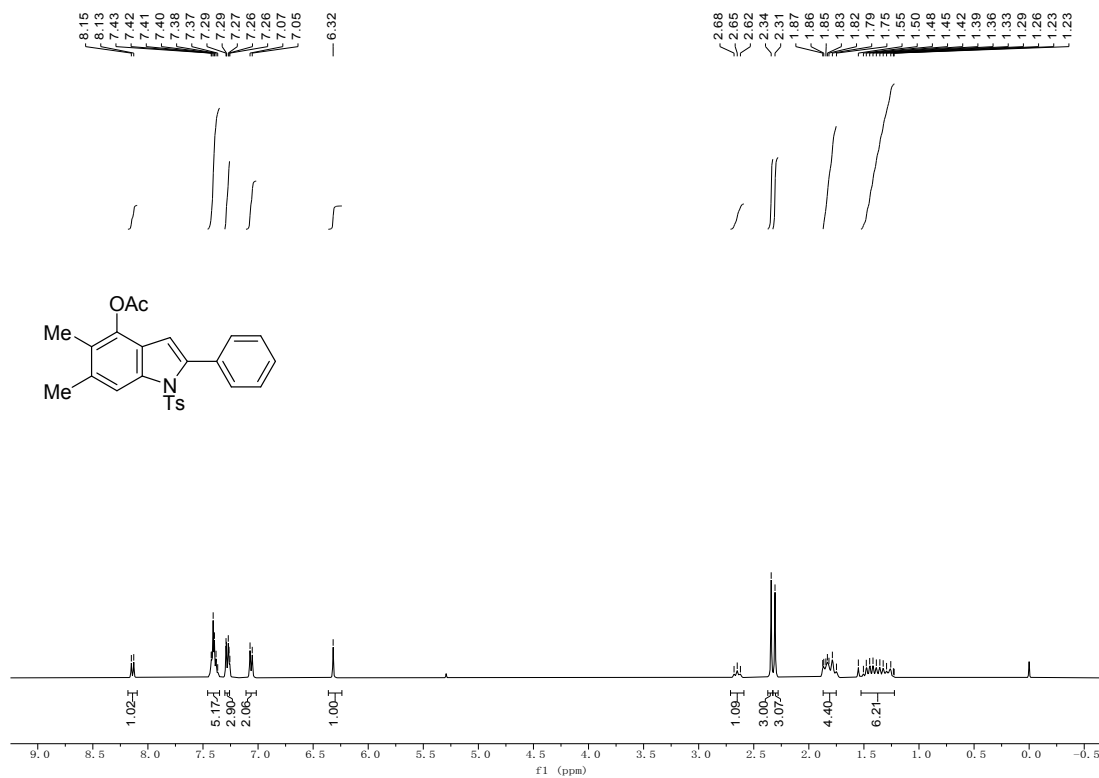

<sup>13</sup>C NMR (101 MHz, CDCl<sub>3</sub>)

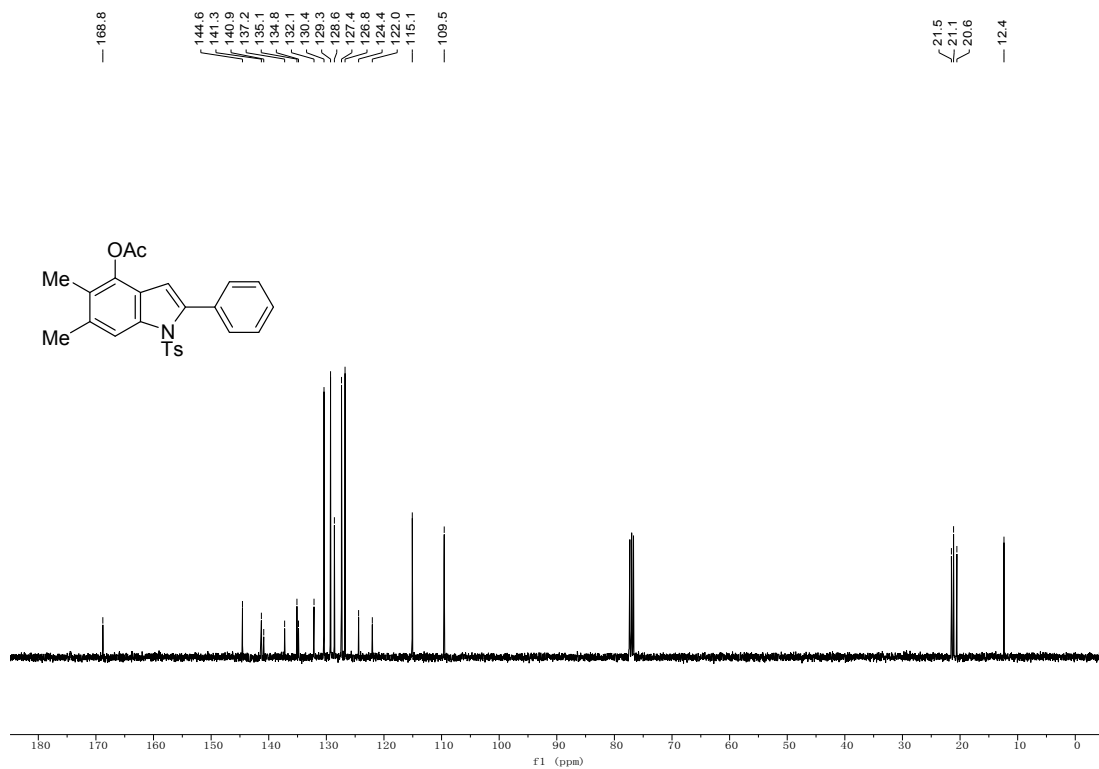

**5-methyl-2-phenyl-1-tosyl-1H-indol-4-yl trifluoromethanesulfonate (28)**

<sup>1</sup>H NMR (400 MHz, CDCl<sub>3</sub>)

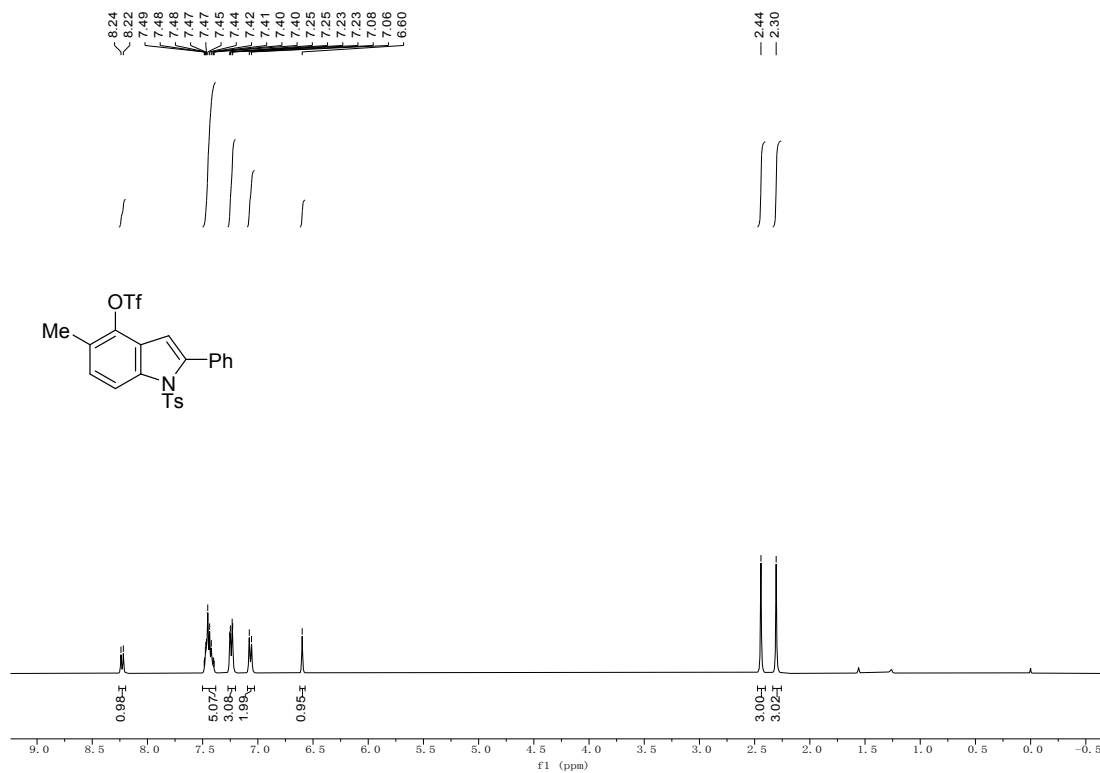

<sup>13</sup>C NMR (101 MHz, CDCl<sub>3</sub>)

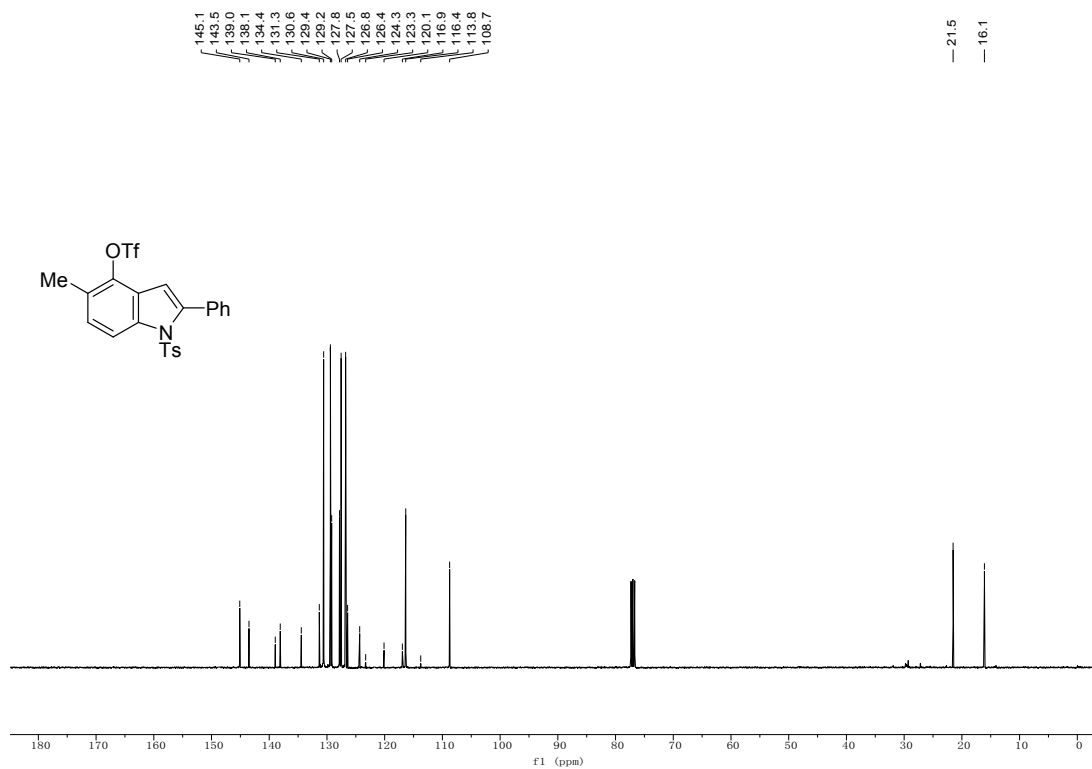

**5-methyl-2,4-diphenyl-1-tosyl-1H-indole (29)**

<sup>1</sup>H NMR (400 MHz, CDCl<sub>3</sub>)

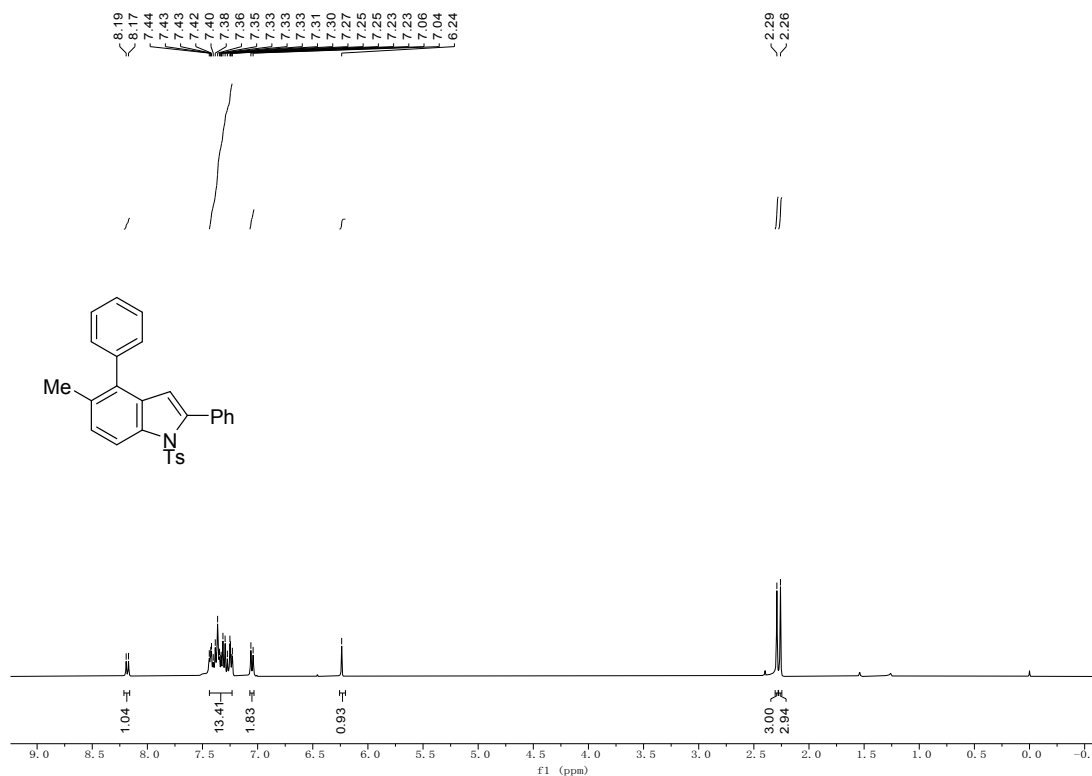

<sup>13</sup>C NMR (101 MHz, CDCl<sub>3</sub>)



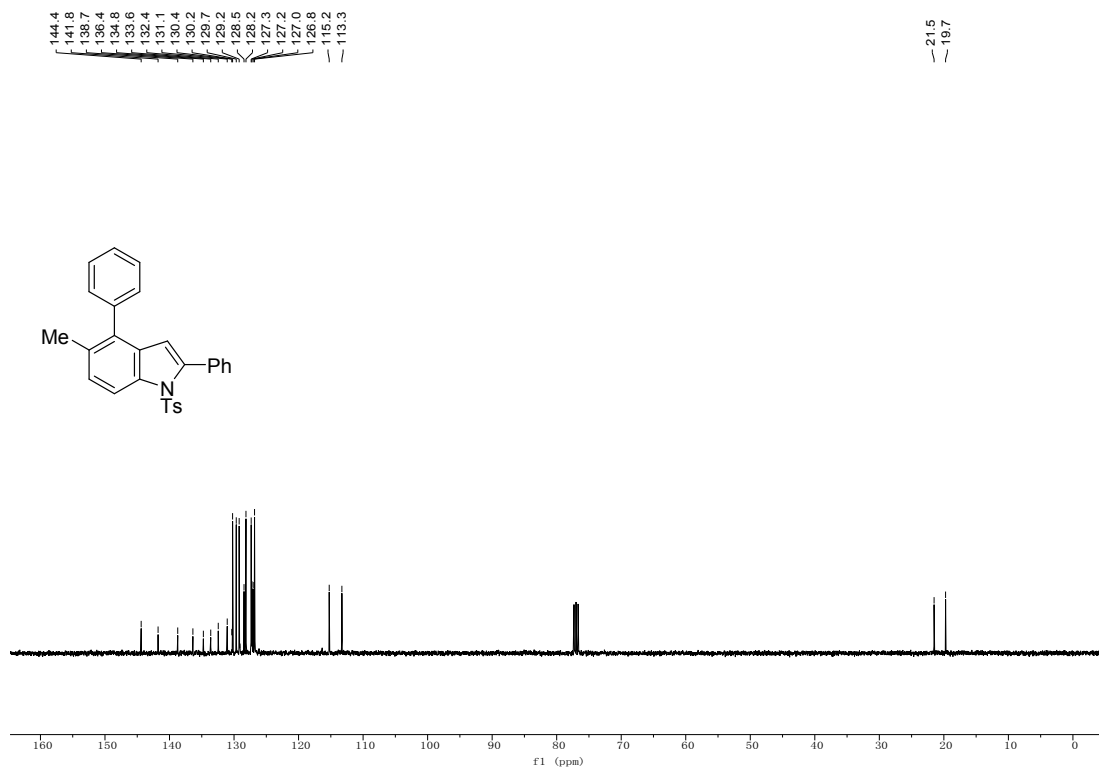

**5-methyl-2-phenyl-1-tosyl-4-((trimethylsilyl)ethynyl)-1H-indole (30)**

<sup>1</sup>H NMR (400 MHz, CDCl<sub>3</sub>)

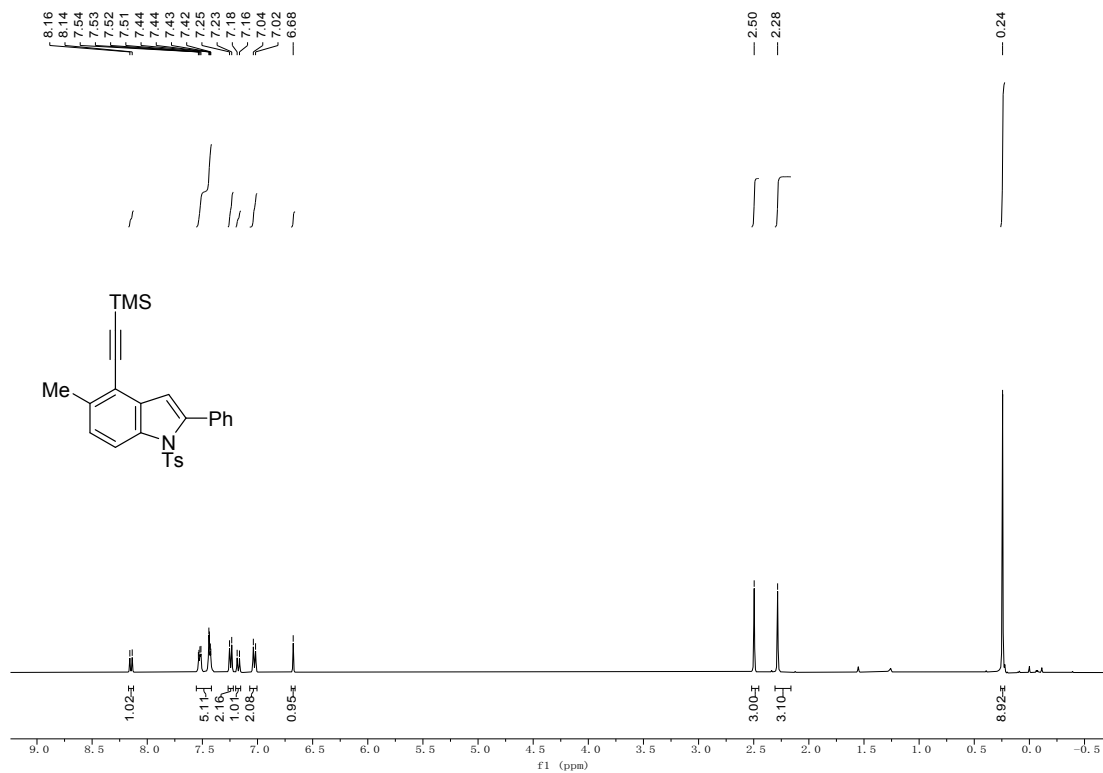

<sup>13</sup>C NMR (101 MHz, CDCl<sub>3</sub>)

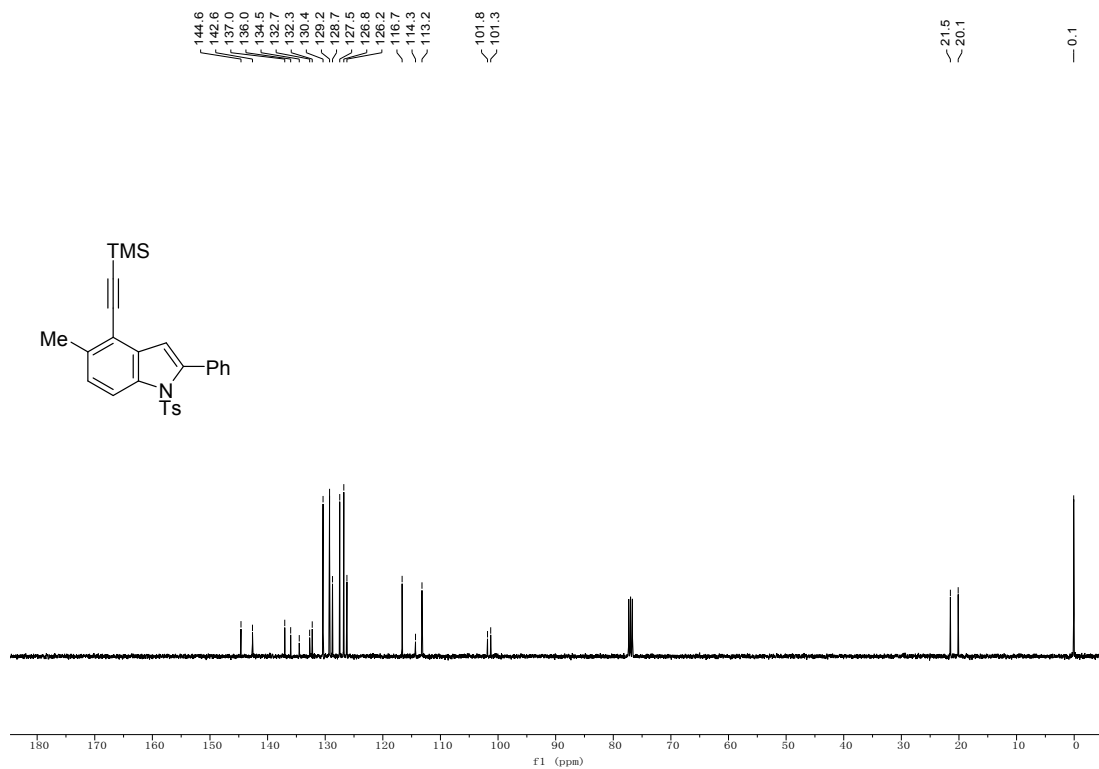

**4-allyl-5-methyl-2-phenyl-1-tosyl-1H-indole (31)**

<sup>1</sup>H NMR (400 MHz, CDCl<sub>3</sub>)

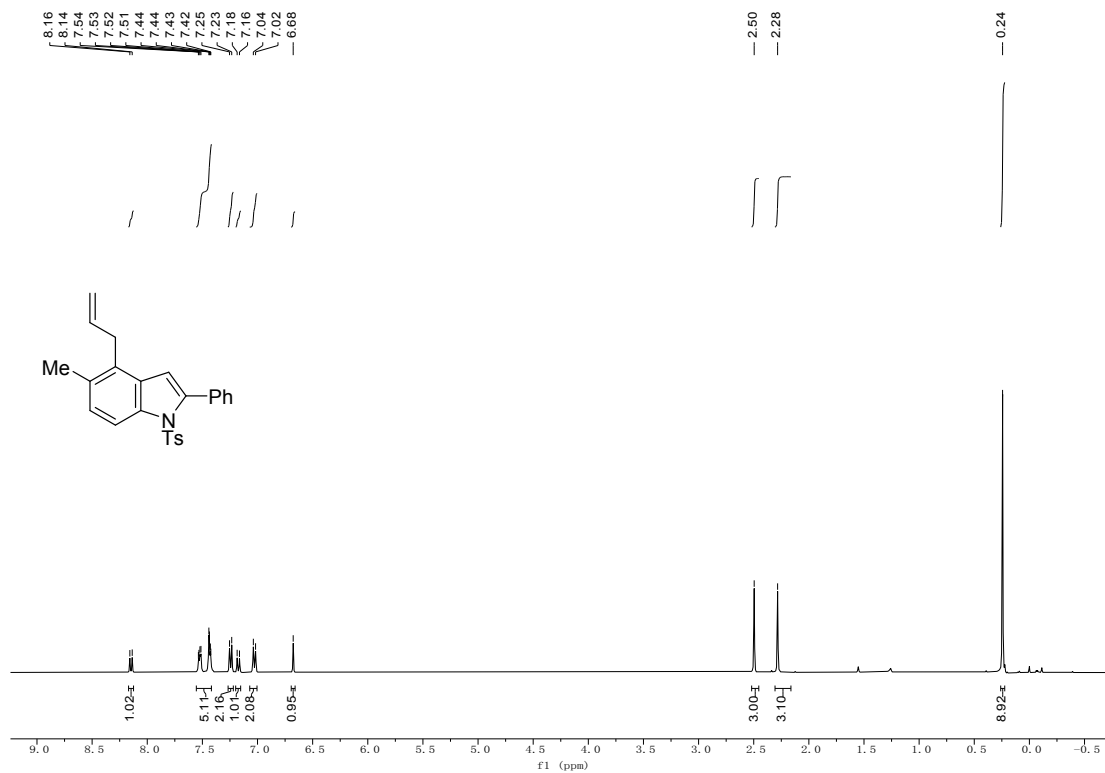

<sup>13</sup>C NMR (101 MHz, CDCl<sub>3</sub>)

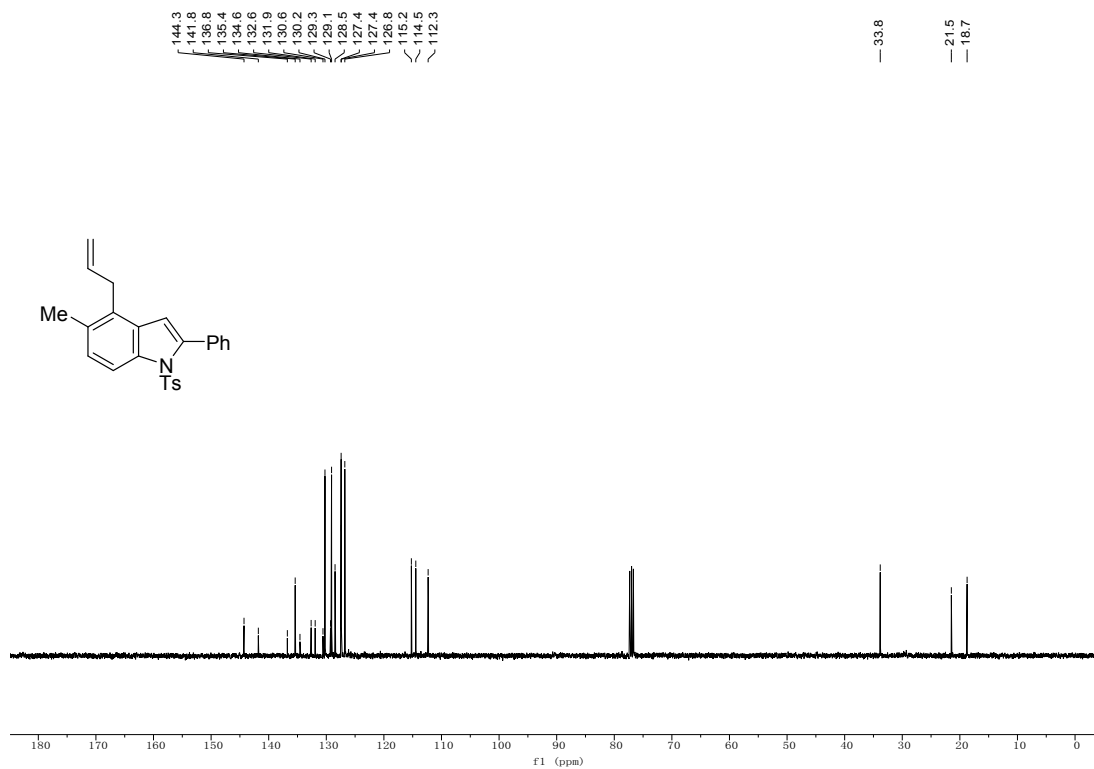

***N*-benzyl-5-methyl-2-phenyl-1-tosyl-1*H*-indol-4-amine (32)**

<sup>1</sup>H NMR (400 MHz, CDCl<sub>3</sub>)

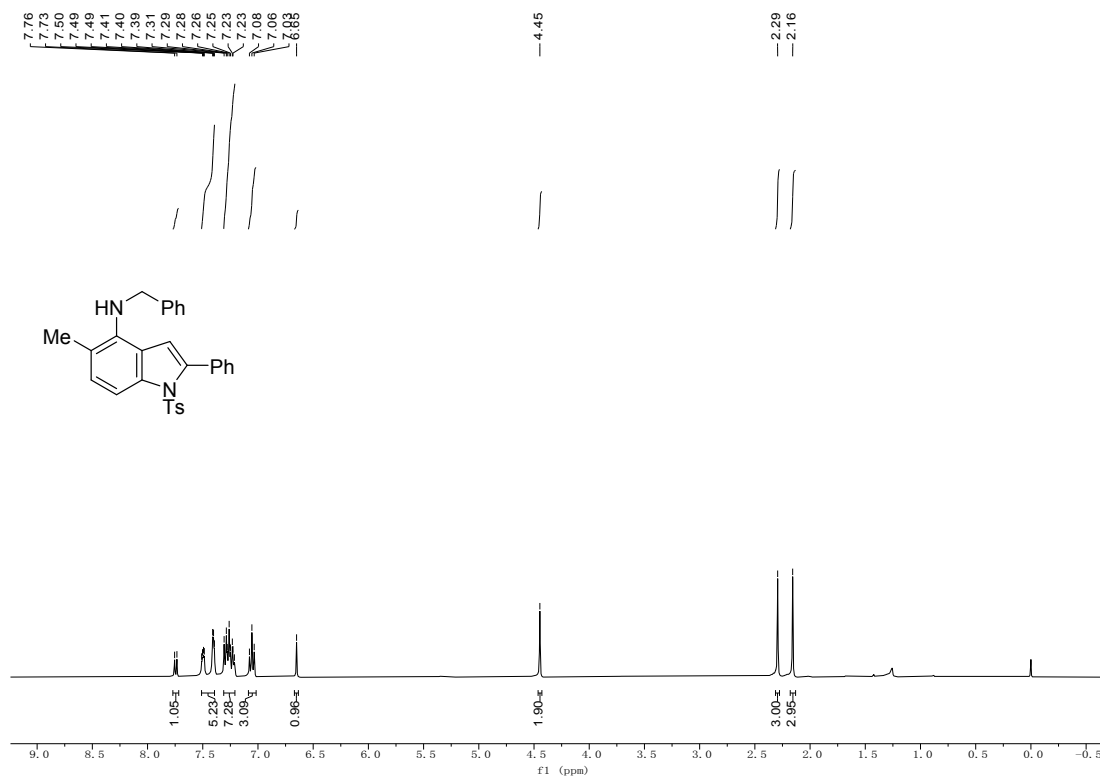

<sup>13</sup>C NMR (101 MHz, CDCl<sub>3</sub>)

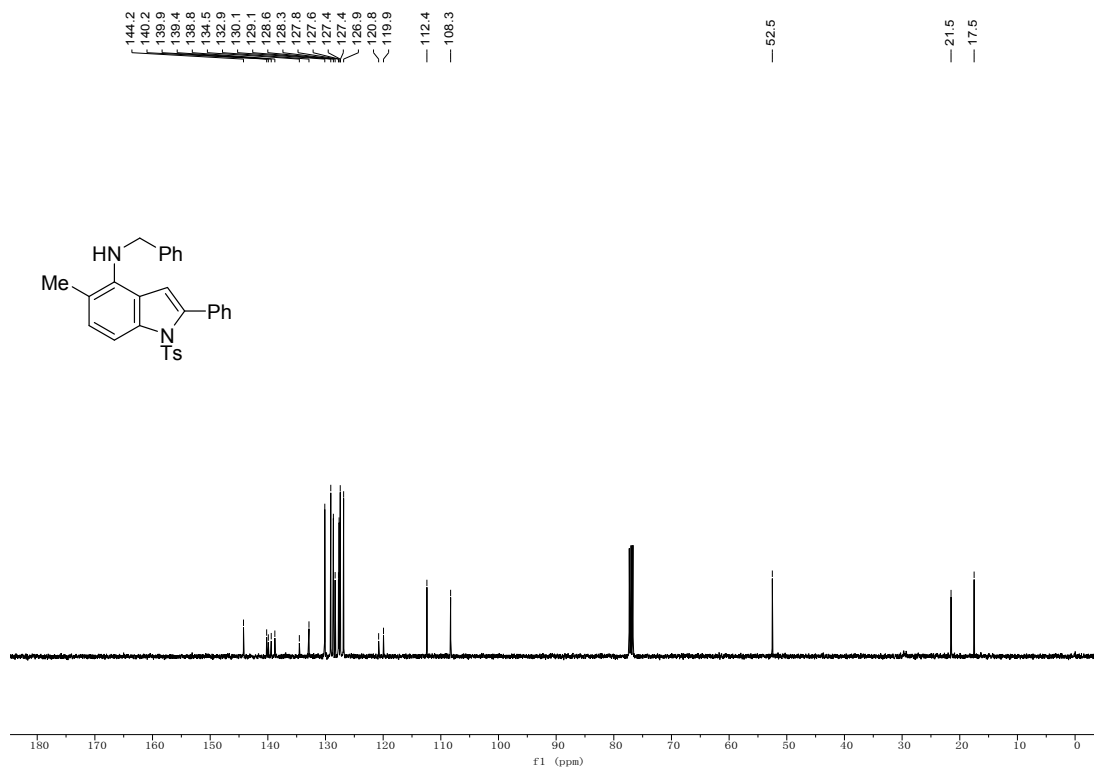

**4-benzyl-5-methyl-2-phenyl-1-tosyl-1H-indole (33)**

<sup>1</sup>H NMR (400 MHz, CDCl<sub>3</sub>)

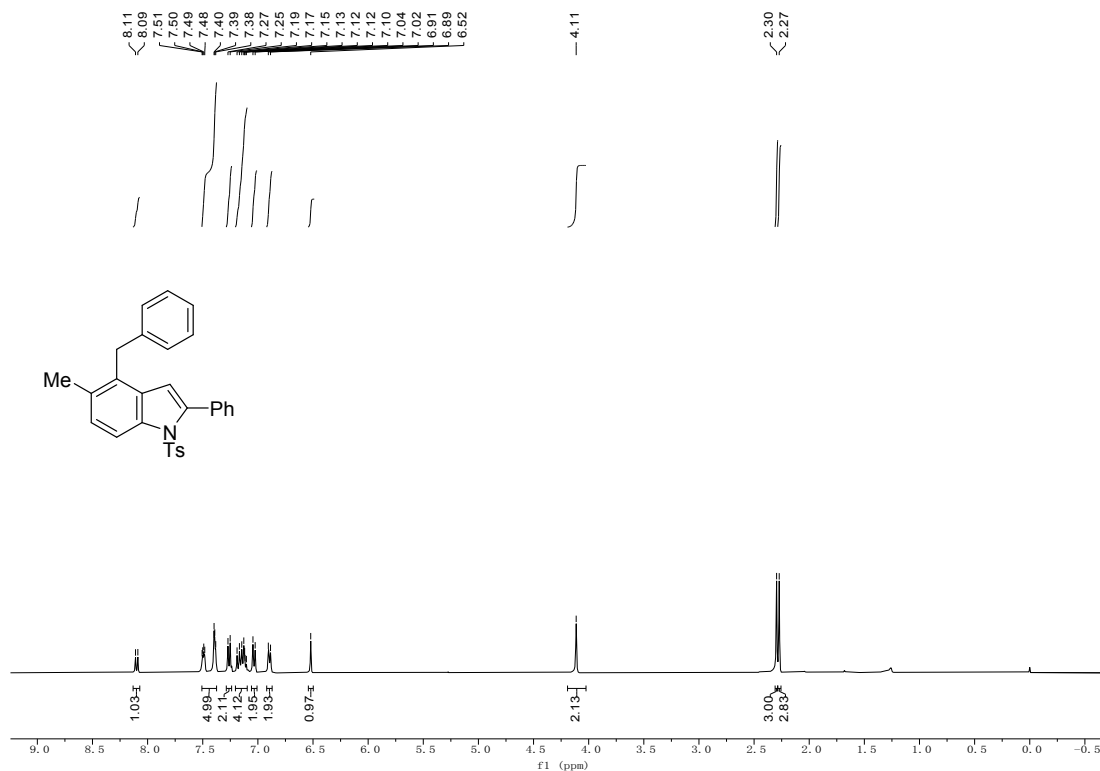

<sup>13</sup>C NMR (101 MHz, CDCl<sub>3</sub>)

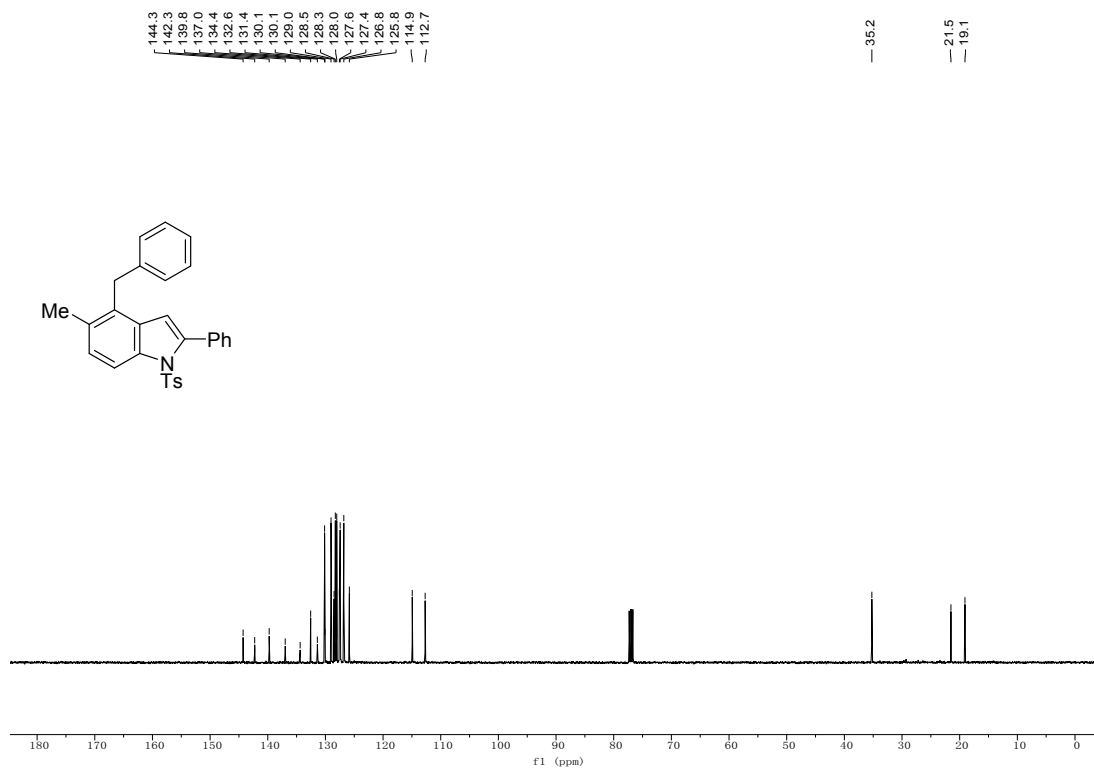

**4,5-dimethyl-2-phenyl-1-tosyl-1H-indole (34)**

<sup>1</sup>H NMR (400 MHz, CDCl<sub>3</sub>)

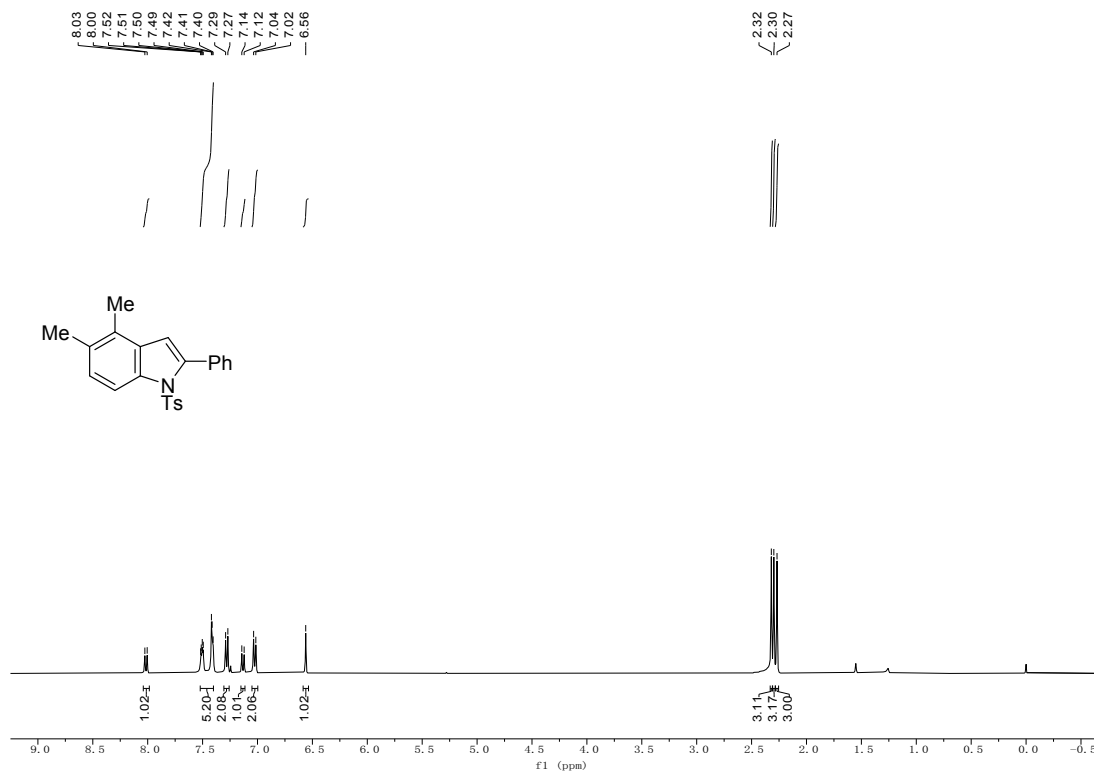

<sup>13</sup>C NMR (101 MHz, CDCl<sub>3</sub>)

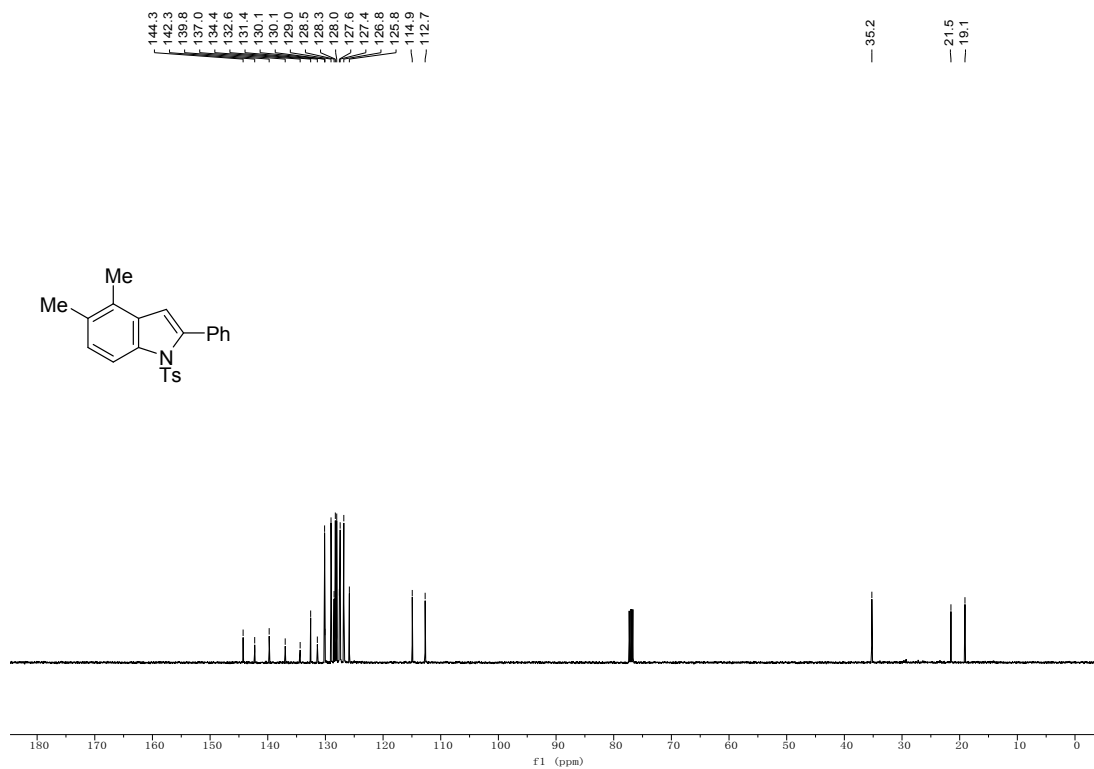

**1-(5-methyl-2-phenyl-1-tosyl-1H-indol-4-yl)pent-1-en-3-one (35)**

<sup>1</sup>H NMR (400 MHz, CDCl<sub>3</sub>)

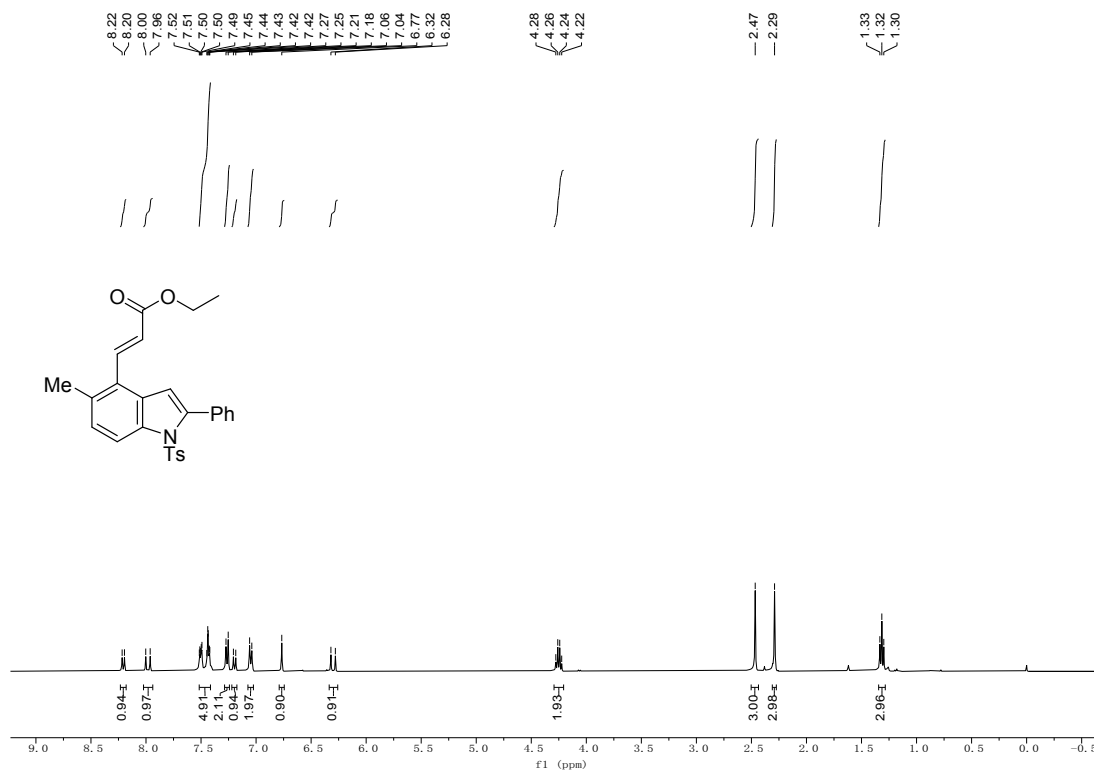

<sup>13</sup>C NMR (101 MHz, CDCl<sub>3</sub>)

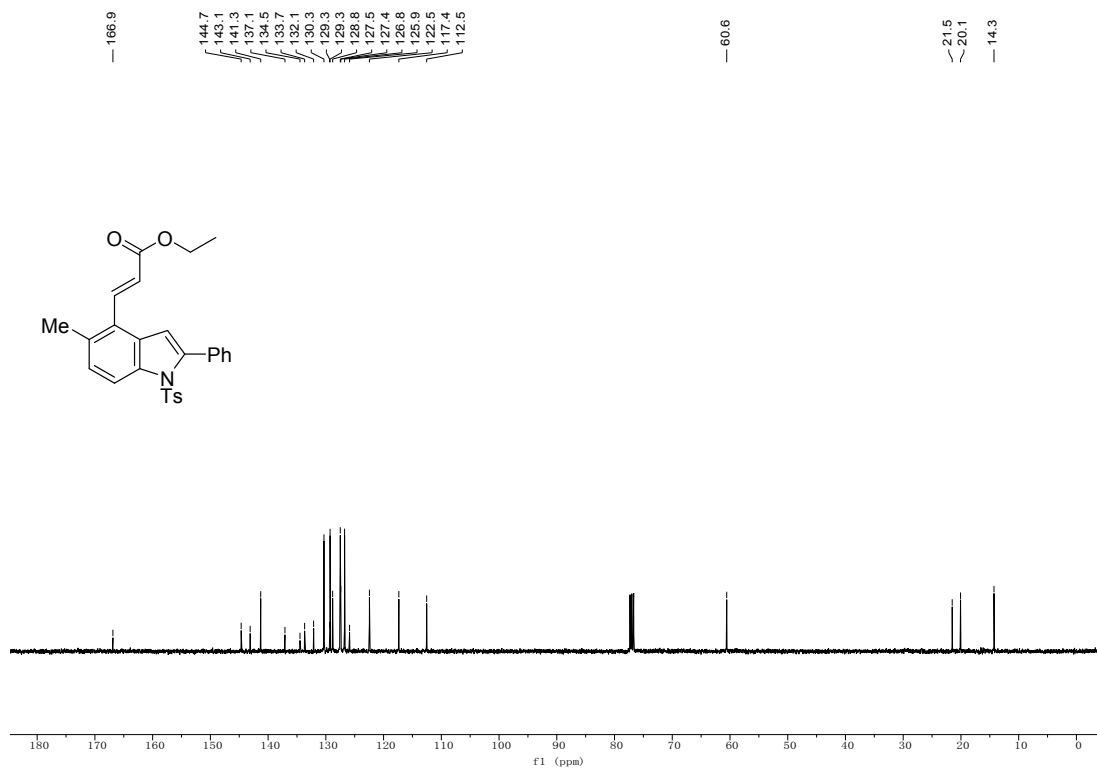

Supplement: d1qo00358e1.pdf [file d1qo00358e1.pdf]
